# Supplementary material for: 3′-End Sequencing for Expression Quantification (3SEQ) from Archival Tumor Samples
Source: PLoS One. 2010 Jan 19;5(1):e8768. doi: 10.1371/journal.pone.0008768 (PMC2808244; doi:10.1371/journal.pone.0008768)
Supplement: Table S2 — Test statistics and FDRs. The first column indicates the gene symbol for the 12,512 genes included in the analysis. The next 8 columns display the row's gene's modified t-statistic and FDR obtained by 3SEQ-frozen, 3SEQ-FFPET, HEEBO-frozen, and HEEBO-FFPET, respectively. A negative t-statistic indicates that the gene showed relatively higher expression in DTF, and a positive t-statistic indicates that the gene showed relatively higher expression in SFT. (2.37 MB XLS) [file pone.0008768.s004.xls]

## Sheet: Gene.Scores.FDRs
Table S2. Test statistics and FDRs.
	3SEQ-Frozen		3SEQ-FFPET		HEEBO-Frozen		HEEBO-FFPET
Gene	Score	FDR	Score	FDR	Score	FDR	Score	FDR
COL1A1	-27.1701	0	-11.2917	0	-5.95257	0	-4.79715	0
TTLL3	16.6029	0	5.40165	0	1.84428	0.03542	-0.15347	0.99145
LRP3	14.5467	0	10.108	0	3.36471	0.00036	0.99355	0.82573
LSP1	14.0418	0	4.55244	0	2.69977	0.00264	2.09519	0.34965
EDF1	13.4554	0	7.28609	0	-0.65999	0.5209	2.08198	0.35779
ARL2	12.7604	0	4.97117	0	0.86645	0.3748	3.17415	0.06881
CCND3	12.4389	0	4.37659	0	5.4865	0	0.05719	0.99719
UBXD1	11.8814	0	4.54327	0	1.39247	0.1211	1.39675	0.65977
CIRBP	11.7191	0	4.75791	0	3.80654	0	1.47281	0.62359
RPS11	11.6667	0	2.74361	0	-0.54954	0.60443	-1.23292	0.72845
C19orf60	11.1785	0	5.51203	0	0.80709	0.41388	1.02411	0.81412
RPS9	11.0736	0	3.8931	0	0.98014	0.30305	-1.18258	0.74976
C19orf24	11.0704	0	3.60807	0	2.07759	0.01771	0.54219	0.93969
NDUFV1	10.4314	0	4.96404	0	-0.51973	0.62681	0.06385	0.99638
PRKD2	10.4118	0	5.27568	0	2.90158	0.00124	0.22372	0.9852
FBF1	10.4061	0	5.2395	0	5.88342	0	0.32759	0.96815
TAPBP	10.4054	0	9.57615	0	2.31268	0.0086	2.42697	0.23098
CENTB5	10.3865	0	7.61247	0	1.40146	0.11844	-0.17378	0.98965
CAPNS1	10.2341	0	7.65781	0	-1.36041	0.13165	-1.03945	0.80708
ERGIC3	10.1414	0	5.85306	0	-0.25553	0.82509	0.11135	0.99459
SCNN1D	10.0128	0	3.63218	0	2.45432	0.0052	-0.22342	0.9852
EML3	9.99467	0	6.02786	0	1.31849	0.1465	1.43902	0.64385
COPE	9.93252	0	7.46367	0	-0.8335	0.39552	-0.63238	0.92182
GSDMDC1	9.90543	0	4.87574	0	1.65104	0.05925	0.13761	0.99145
SUPT6H	9.83752	0	8.37407	0	1.28762	0.15755	0.16491	0.99014
NDUFS8	9.65233	0	5.08121	0	-1.25016	0.17139	0.67179	0.91394
RPL18	9.62099	0	7.64187	0	0.94101	0.32776	-0.51469	0.9434
PARP10	9.5244	0	5.15956	0	1.18629	0.19868	-1.69496	0.53382
NRBP1	9.50784	0	9.02011	0	-0.46855	0.6667	-0.37793	0.96202
ARL6IP4	9.39543	0	4.83075	0	-0.83361	0.3955	-0.19376	0.98894
CORO7	9.32984	0	5.3968	0	1.1495	0.21655	-0.47664	0.95026
LGALS3BP	9.30345	0	8.76265	0	3.7013	0	1.3776	0.66851
INTS1	9.30318	0	6.54525	0	1.26241	0.16671	-1.4323	0.64664
SDF4	9.18738	0	3.90444	0	-1.95243	0.02546	-0.38363	0.96082
NDUFA11	9.1767	0	4.92982	0	-2.0383	0.01959	1.02264	0.81412
OTUB1	9.12346	0	3.85261	0	0.54526	0.60811	1.63727	0.55532
GNB2L1	9.10742	0	3.27713	0	0.27142	0.81402	-1.28801	0.70847
DUS1L	9.05992	0	5.77024	0	2.01761	0.02119	0.73145	0.90122
GPX4	9.01956	0	4.99568	0	-1.88444	0.03142	0.02047	0.9992
NENF	8.9727	0	4.16522	0	-0.40661	0.71529	-1.83319	0.4673
COQ4	8.94667	0	4.53308	0	2.62302	0.00307	0.38327	0.96082
APRT	8.86061	0	4.40896	0	1.44232	0.10704	-0.23896	0.98435
FBXO31	8.85806	0	5.77854	0	0.11974	0.92368	1.28632	0.70847
FAM113A	8.83589	0	3.41479	0	1.81609	0.03825	1.55074	0.58858
KIAA0913	8.75606	0	6.29226	0	0.87365	0.36997	1.42062	0.65272
LY6E	8.75275	0	14.8674	0	-0.45825	0.67439	0.23192	0.98513
NR1H2	8.71115	0	5.56604	0	1.47287	0.0987	0.45995	0.95278
LRP1	8.65969	0	4.9292	0	0.87102	0.37119	0.03694	0.9992
LMAN2	8.59047	0	5.67098	0	1.41227	0.11522	0.21128	0.98827
TCIRG1	8.49996	0	3.81047	0	-0.73611	0.46372	-0.27864	0.97887
TUFM	8.49788	0	5.45043	0	0.79225	0.42378	0.25567	0.98171
PALM	8.46132	0	3.58697	0	2.21598	0.01164	0.51483	0.94333
MAPK8IP3	8.43391	0	4.63536	0	2.08632	0.01736	0.5286	0.94226
APEH	8.38439	0	4.48975	0	1.60856	0.0663	-0.10063	0.99537
COX4I1	8.33478	0	4.1098	0	0.03904	0.97727	-1.63141	0.55789
CYC1	8.33225	0	3.25472	0	1.02586	0.27738	-0.17024	0.99014
PHPT1	8.32658	0	4.19775	0	-2.82065	0.00177	0.2793	0.97809
DPM3	8.30458	0	4.07715	0	1.7864	0.04105	0.38179	0.96082
STUB1	8.24566	0	4.19385	0	-0.5405	0.61148	-3.38338	0.04706
RHBDD2	8.24279	0	5.20716	0	3.52815	0	0.46626	0.95208
IRF3	8.21648	0	6.21719	0	2.39696	0.00653	0.72626	0.90197
NDUFA13	8.17188	0	4.12904	0	-1.32002	0.14619	-0.2207	0.98601
SAP30BP	8.16132	0	4.41146	0	0.0117	0.99333	0.41984	0.95836
BSG	8.1162	0	5.21957	0	3.27128	0.00036	-0.56392	0.93738
OTUD5	8.10553	0	6.8582	0	3.02334	0.00082	-0.67125	0.91394
PFDN5	8.08926	0	6.98769	0	-0.25963	0.82275	0.71311	0.90297
PHLDA3	8.08462	0	4.84628	0	0.14943	0.9012	0.00709	0.9992
SSR4	8.01829	0	3.09474	0	-2.53276	0.00431	-2.89309	0.11821
NISCH	8.00934	0	7.21258	0	4.13145	0	0.60376	0.92987
UBA52	7.98961	0	6.07758	0	-0.63601	0.53937	-0.61583	0.92583
COBRA1	7.86033	0	4.46116	0	-0.29529	0.79715	-0.35693	0.96275
PTBP1	7.85993	0	5.5267	0	0.57399	0.58584	0.44024	0.95581
H2AFJ	7.85693	0	4.63796	0	4.48259	0	0.20672	0.98827
SPTBN1	7.85168	0	6.33512	0	2.14796	0.0145	0.61937	0.92562
GSS	7.83721	0	5.54768	0	2.25049	0.01062	1.14597	0.76557
PPP2R4	7.81781	0	3.81317	0	0.46596	0.66833	-0.45262	0.95581
VPS25	7.80681	0	5.54091	0	0.72564	0.47185	0.85852	0.87323
AUP1	7.79346	0	5.28232	0	1.0043	0.28895	-0.01004	0.9992
SHARPIN	7.77513	0	4.01463	0	1.2353	0.17883	-0.07506	0.99626
CPT1B	7.69507	0	4.12437	0	-0.07329	0.95484	-1.05464	0.80159
AKAP8L	7.68764	0	5.6516	0	2.21044	0.01181	1.24737	0.72291
GRINA	7.6616	0	5.15185	0	-1.04178	0.26876	0.59308	0.93179
PRPF6	7.63272	0	7.05144	0	1.51699	0.08774	-1.18625	0.74795
SIL1	7.48464	0	4.86385	0	0.42543	0.69903	-0.24526	0.9824
FAU	7.41438	0	2.85516	0	-0.00855	0.99495	-0.685	0.90976
ZDHHC1	7.39912	0	3.73362	0	-0.72048	0.47585	-0.3082	0.97192
LOC389541	7.35958	0	5.14397	0	1.01094	0.28483	0.55435	0.93767
RNF187	7.35845	0	4.74611	0	1.78511	0.04125	0.94951	0.84552
SH3GL1	7.34687	0	3.45525	0	-0.2342	0.84051	-0.2581	0.98117
ADRM1	7.33224	0	4.09515	0	-1.39384	0.12048	-0.17657	0.98909
THAP7	7.31707	0	4.25158	0	4.64556	0	1.79734	0.48742
RPL8	7.25988	0	5.05949	0	0.33762	0.76703	-0.77134	0.8941
ATP6AP1	7.24547	0	7.11961	0	0.44909	0.68183	-0.9155	0.85162
CABIN1	7.19775	0	4.05086	0	2.7977	0.002	0.87777	0.86504
PLXNB2	7.19555	0	8.79032	0	1.17847	0.2029	0.27516	0.97912
COL1A2	-7.16056	0	-4.74538	0	-12.0359	0	-6.9307	0
CDK10	7.15942	0	3.83962	0	3.00163	0.00095	-0.71166	0.90319
TRAP1	7.15619	0	3.30275	0	1.25374	0.17002	0.47155	0.95208
CLCN7	7.15503	0	5.36857	0	1.3454	0.13698	1.08376	0.79321
WASF2	7.15401	0	5.41013	0	2.35241	0.00768	1.10803	0.78303
BAIAP2	7.09668	0	7.09658	0	8.61031	0	1.00334	0.82453
TMEM175	7.05144	0	5.65417	0	3.62132	0	0.40562	0.96082
RNF31	7.02784	0	4.26244	0	0.08165	0.94994	-0.45364	0.95581
CCS	6.9536	0	5.73818	0	1.82604	0.03736	1.93637	0.42772
AIP	6.9514	0	4.21092	0	1.71209	0.04984	1.61479	0.56425
ETFB	6.94355	0	3.17895	0	-0.09683	0.94076	2.04243	0.38111
DNM2	6.89118	0	5.31234	0	-2.08492	0.01753	1.10643	0.78329
NDUFB7	6.88615	0	3.09868	0	-1.7786	0.04225	-0.28183	0.97723
GPR137	6.88461	0	3.28974	0	0.50944	0.63394	1.30828	0.69881
TBC1D17	6.83798	0	3.96358	0	1.99097	0.0229	-0.41704	0.95878
ZNF692	6.82041	0	2.7878	0	1.02709	0.27686	0.94593	0.84552
GCN5L2	6.81647	0	5.05925	0	6.02457	0	-0.92677	0.85028
ST5	6.80953	0	5.45731	0	0.0027	0.9984	-1.1944	0.74691
TSPYL2	6.80017	0	4.15827	0	6.86214	0	0.85615	0.87482
BCKDHA	6.77662	0	6.04501	0	-0.56407	0.59343	0.99956	0.82573
PRAF2	6.76087	0	3.59384	0	-0.73983	0.46167	-0.96253	0.83877
CTBP1	6.73281	0	3.37133	0	3.44112	0.00036	0.35562	0.96275
PTOV1	6.73144	0	4.90883	0	-0.20328	0.86204	-0.55902	0.93738
B3GNT1	6.70205	0	3.20323	0	3.80354	0	0.76809	0.8941
CCDC57	6.68327	0	5.20936	0	3.63284	0	1.06726	0.79785
RER1	6.65395	0	2.48137	0.00018	-1.14242	0.21875	-2.20349	0.31409
FBXW5	6.61035	0	4.65648	0	-1.85067	0.03446	-1.16934	0.75632
CCDC124	6.60244	0	4.35276	0	-0.30004	0.79346	-1.13187	0.77
CUL7	6.59763	0	4.86618	0	3.98048	0	1.07564	0.79614
NR2F6	6.59254	0	4.12836	0	1.50713	0.0898	-0.0177	0.9992
LMNA	6.5871	0	1.71314	0.00408	-3.77699	0	-0.81181	0.88632
TRMT1	6.58362	0	3.07192	0	2.56838	0.00375	2.38168	0.24274
PRNPIP	6.58064	0	5.38332	0	-1.20678	0.18943	-0.62979	0.92284
ZER1	6.57643	0	4.32962	0	2.66789	0.00286	2.07416	0.36425
HTF9C	6.57556	0	2.98058	0	1.18076	0.20181	-0.7326	0.90122
CALR	6.57548	0	0.68854	0.24722	-3.41146	0.00036	-0.31926	0.96982
SLC12A4	6.56065	0	4.46962	0	-0.15402	0.89818	-0.83241	0.88099
DPH1	6.55352	0	4.84845	0	3.86902	0	1.36623	0.67137
NDUFS6	6.53514	0	1.94873	0.00122	-0.87176	0.37095	0.04127	0.9992
AP1M1	6.50978	0	4.57281	0	-0.68797	0.49719	-0.0585	0.9971
COL3A1	-6.4939	0	-4.09348	0	-3.53101	0	-2.43222	0.22985
AATF	6.49362	0	4.60232	0	0.42031	0.70402	2.53625	0.19831
DNAJB2	6.44786	0	3.77844	0	3.48113	0	2.03118	0.39121
VAMP8	6.44755	0	4.93916	0	3.52417	0	1.20613	0.74511
MAN1B1	6.43782	0	5.3542	0	-1.38385	0.12387	-0.36935	0.96224
ASNA1	6.42817	0	4.13709	0	-1.01143	0.28451	-0.41076	0.96024
D2HGDH	6.42711	0	4.56418	0	1.96932	0.02433	-0.2665	0.981
AP2S1	6.42589	0	5.4522	0	-2.4853	0.00489	-1.64014	0.55532
PPP5C	6.42025	0	3.5897	0	1.34925	0.13565	0.22483	0.9852
SYF2	6.40899	0	2.50046	0.00018	3.73787	0	0.50039	0.94675
SMG6	6.40407	0	5.42761	0	3.41214	0.00036	0.47605	0.95077
LAG3	6.3979	0	4.97485	0	8.11875	0	1.23247	0.72845
ACADVL	6.38341	0	4.64451	0	6.08081	0	2.71408	0.15147
SCAND1	6.3787	0	4.54707	0	-0.40791	0.71429	0.2573	0.98124
PDDC1	6.36119	0	2.74152	0	1.34312	0.13788	-0.57944	0.93596
RHOT2	6.3276	0	3.38204	0	-0.13639	0.91111	1.1765	0.75381
RALY	6.32399	0	6.09866	0	-4.31309	0	0.23274	0.98513
GPS1	6.31802	0	4.79436	0	-1.12958	0.2239	-0.57372	0.93699
SNX17	6.31635	0	6.24205	0	1.7617	0.04321	0.49209	0.94853
SORBS3	6.29728	0	6.49417	0	-0.41859	0.70556	-0.20769	0.98827
MRPL55	6.28432	0	3.35933	0	0.75896	0.44717	0.66242	0.91675
WDR74	6.28073	0	3.19063	0	2.52774	0.00451	-0.12363	0.99199
C21orf33	6.2655	0	5.81268	0	1.97412	0.02426	0.53572	0.94187
GUK1	6.26382	0	7.70803	0	-0.31776	0.78122	-0.61745	0.92562
TBKBP1	6.25819	0	4.29102	0	4.14315	0	0.55962	0.93738
SGTA	6.2433	0	5.4098	0	1.49394	0.09321	-0.18048	0.98894
PSD	6.23166	0	9.7105	0	4.61579	0	0.39556	0.96082
PHLDB1	6.22294	0	4.13598	0	4.67623	0	1.85495	0.45857
PLD3	6.22115	0	14.9653	0	1.6121	0.06528	0.55732	0.93738
MRPL37	6.1963	0	4.29281	0	-0.19235	0.86994	-1.57858	0.57955
TXN2	6.19078	0	2.95194	0	3.27362	0.00036	0.75569	0.89823
RFXANK	6.18652	0	2.3495	0.00018	1.60342	0.06762	0.01801	0.9992
MIB2	6.18419	0	4.12245	0	-3.66383	0	0.1457	0.99145
CYBASC3	6.17266	0	2.42564	0.00018	1.14941	0.21655	0.58527	0.93501
ST6GALNAC6	6.16221	0	4.88522	0	-0.02286	0.98637	-0.56504	0.93738
WDR13	6.15814	0	3.79521	0	0.99903	0.29188	0.63724	0.92182
APOBEC3C	6.14261	0	0.63483	0.28983	2.06503	0.01818	-0.03221	0.9992
SCRN2	6.13935	0	3.00798	0	2.59826	0.00341	-0.62221	0.925
ARFRP1	6.13492	0	4.93517	0	-1.83632	0.0362	-0.36746	0.96224
DCTN1	6.1316	0	5.70448	0	-1.19836	0.1928	0.08939	0.99556
SSU72	6.11091	0	9.65034	0	2.25296	0.01032	-0.94676	0.84552
SEC61A1	6.08432	0	2.81493	0	-3.74302	0	-0.84264	0.87858
SLC25A11	6.07426	0	3.89927	0	0.10641	0.93336	-0.42344	0.95836
ITFG3	6.06501	0	2.5741	0	-0.63649	0.53907	0.06947	0.99636
NPDC1	6.05971	0	4.77153	0	2.28065	0.00968	0.80243	0.88842
PPP1R7	6.05863	0	1.36726	0.01781	1.87092	0.03275	0.14231	0.99145
SIVA1	5.99704	0	4.41509	0	-0.46233	0.67085	0.15717	0.99137
DDX56	5.97241	0	2.36938	0.00018	0.66584	0.51589	0.18776	0.98894
HADHA	5.94123	0	3.87342	0	0.66747	0.51419	0.09978	0.99537
SNRPD2	5.93552	0	2.22356	0.00032	1.27355	0.16293	0.42625	0.95836
OGFR	5.93039	0	3.70906	0	2.09273	0.01712	0.05422	0.9977
MKNK2	5.92241	0	1.89559	0.00154	2.80441	0.002	-0.98944	0.82766
CHMP2A	5.90329	0	2.85493	0	0.16386	0.89106	0.89201	0.86011
LCAT	5.89621	0	4.49986	0	1.38878	0.12215	-0.35414	0.96295
MBD3	5.86559	0	5.05222	0	0.24364	0.83413	-0.29251	0.97589
AURKAIP1	5.85693	0	2.32723	0.00026	-1.00473	0.28885	1.18949	0.74691
PRPF19	5.84676	0	4.14459	0	0.21301	0.85658	0.87448	0.86721
NDUFA3	5.84473	0	2.48052	0.00018	0.42207	0.70209	1.27104	0.71431
BUD31	5.83495	0	3.01825	0	-1.0006	0.29086	0.96917	0.83459
CDC37	5.8055	0	3.63361	0	-0.01399	0.99188	0.03357	0.9992
TNFRSF1A	5.79888	0	4.1104	0	-0.19016	0.87117	-1.38233	0.66667
FKBP8	5.7856	0	4.10455	0	0.35601	0.75287	0.05576	0.99736
TBC1D24	5.77812	0	8.64571	0	5.52013	0	6.03766	0
GADD45GIP1	5.76946	0	1.98391	0.00101	-1.13679	0.22116	0.26669	0.981
MAF1	5.74447	0	3.5577	0	1.27188	0.16331	0.10806	0.9946
MGRN1	5.74364	0	6.22628	0	3.48052	0	1.60732	0.56684
C3	5.72538	0	3.12495	0	2.14106	0.01474	1.43763	0.64385
G6PC3	5.72477	0	3.73414	0	0.75171	0.45327	-0.32226	0.96949
ZMIZ2	5.72387	0	4.05257	0	-0.12784	0.91785	0.82181	0.88408
NMRAL1	5.71113	0	4.21865	0	0.22473	0.8478	0.12989	0.99145
PRKCSH	5.70668	0	6.06875	0	1.09458	0.24032	0.27467	0.97912
TRMU	5.67784	0	3.82384	0	1.11048	0.23202	0.08274	0.99626
ATP6V0D1	5.671	0	5.31666	0	1.34935	0.13565	2.79141	0.13372
CDC42EP5	5.66072	0	3.39537	0	-1.08625	0.24436	0.0946	0.99537
CENTD2	5.65838	0	2.72865	0	-2.28304	0.00968	-0.78426	0.8941
SPG7	5.65809	0	2.88378	0	2.24884	0.01062	1.49722	0.61275
NME3	5.64803	0	3.76753	0	1.21016	0.18879	-0.75042	0.89823
PQBP1	5.64054	0	1.66896	0.00511	2.03431	0.01975	-0.14321	0.99145
PYCARD	5.63511	0	3.52203	0	3.92488	0	-0.04114	0.9992
SPATA20	5.62003	0	3.03645	0	0.85552	0.38155	1.27626	0.71357
NPLOC4	5.61745	0	2.36558	0.00018	0.09473	0.94153	-0.08819	0.99556
ECHS1	5.59323	0	3.65804	0	0.02144	0.98746	-0.66262	0.91675
AP2A2	5.58739	0	3.65752	0	-0.41399	0.7092	0.59353	0.93179
RPL11	5.58527	0	3.80003	0	1.11959	0.22823	-0.39427	0.96082
DMWD	5.56716	0	3.73287	0	0.40219	0.71827	-0.00277	0.9992
C12orf57	5.55729	0	5.51669	0	-1.1384	0.22047	-1.19186	0.74691
MAP2K2	5.55551	0	5.33858	0	-1.36807	0.12854	-0.56902	0.93738
INPPL1	5.55288	0	3.07365	0	-0.47912	0.65804	0.01406	0.9992
PTMS	5.55122	0	5.91109	0	2.54095	0.00421	3.60215	0.02985
VARS	5.54961	0	4.03331	0	2.26965	0.00984	1.09327	0.79022
ENSA	5.54211	0	2.77903	0	3.69972	0	2.467	0.21881
GBL	5.51442	0	3.24102	0	0.96685	0.31116	-0.43638	0.95581
POLL	5.50865	0	3.69057	0	2.70867	0.00264	-0.52628	0.94226
TCEB2	5.50011	0	2.38489	0.00018	-0.19564	0.86728	0.29946	0.97365
TRAPPC6A	5.49949	0	5.63372	0	4.80079	0	-0.46184	0.95232
RRAS	5.49401	0	8.1196	0	0.78136	0.4324	-0.99436	0.82573
CARM1	5.48033	0	6.84682	0	-0.91329	0.34431	-0.29158	0.97633
COASY	5.47769	0	2.44179	0.00018	3.75594	0	1.33328	0.68866
CALCOCO1	5.47138	0	3.50844	0	1.38536	0.12338	0.47049	0.95208
POLR2L	5.45046	0	3.11046	0	-3.17469	0.00067	0.58707	0.93436
FLJ44968	5.42794	0	2.88555	0	0.83559	0.3939	-1.09465	0.79011
SNX21	5.40984	0	4.70362	0	3.60392	0	-0.0732	0.99626
RPS19BP1	5.37624	0	2.99082	0	0.37122	0.74217	-0.15706	0.99137
UQCRC1	5.35875	0	2.59099	0	-1.51712	0.08774	-0.12515	0.99145
LSM4	5.35104	0	3.38101	0	0.2152	0.85463	-0.6563	0.91803
FAM3A	5.34435	0	2.95901	0	0.57499	0.58512	-0.79236	0.89165
ATG4B	5.291	0	2.27951	0.00032	2.90948	0.00124	-0.51757	0.94237
FBL	5.28911	0	2.11398	0.00047	2.20404	0.0122	0.26144	0.981
UNC45A	5.28426	0	3.61017	0	0.02518	0.98499	0.0203	0.9992
CHMP1A	5.27734	0	3.99844	0	-0.56577	0.5922	0.00551	0.9992
IFITM1	5.26141	0	3.07882	0	0.37944	0.73541	0.17789	0.98894
FLAD1	5.24985	0	2.56447	0	0.00619	0.99616	-0.6734	0.91394
SARS	5.22847	0	2.49583	0.00018	1.83983	0.0361	1.36296	0.67345
PGLS	5.21462	0	2.57875	0	-1.42351	0.11228	0.68137	0.91235
TMEM134	5.21236	0	3.46153	0	1.47295	0.0987	-1.79831	0.48742
STAT6	5.20328	0	3.48817	0	6.45676	0	3.24258	0.06
MYST1	5.20161	0	2.63805	0	4.123	0	0.89056	0.86047
SLC22A17	5.19601	0	3.03102	0	-0.25766	0.82397	0.16282	0.9907
LRDD	5.18242	0	4.6163	0	4.43639	0	1.22564	0.73287
FAM50A	5.17905	0	3.80296	0	-2.12619	0.01578	-0.19988	0.98827
BTBD2	5.17488	0	3.60504	0	1.19402	0.19535	-0.65295	0.91923
HCCA2	5.16313	0	3.82231	0	4.44435	0	1.38477	0.66515
MRC2	5.15533	0	3.96525	0	-0.13046	0.91631	0.13431	0.99145
CIB1	5.14297	0	3.17973	0	0.34312	0.76229	0.20085	0.98827
CTDSP1	5.13059	0	4.54385	0	-1.05954	0.25914	-0.19796	0.98853
C19orf53	5.08622	0	1.85753	0.00166	-0.08719	0.94666	-0.37286	0.96224
VRK3	5.07809	0	3.98558	0	3.67937	0	2.34092	0.26384
RANGAP1	5.0773	0	3.67724	0	1.54144	0.08144	1.1069	0.78303
RNF26	5.07712	0	4.97343	0	0.65753	0.52235	-0.83957	0.87876
EXOC3	5.07608	0	3.4005	0	4.86761	0	0.98114	0.83221
ZNHIT1	5.07327	0	2.71716	0	-3.03393	0.00082	-0.71455	0.90297
MOV10	5.066	0	3.42855	0	1.86762	0.03299	1.92895	0.4287
LTBP3	5.05484	0	6.05055	0	-0.4263	0.69825	-0.21922	0.98623
TRIOBP	5.05421	0	5.40137	0	0.06299	0.96236	-1.02268	0.81412
GSK3A	5.00289	0	3.69485	0	-0.41599	0.70808	1.10736	0.78303
TTC15	5.00192	0	1.93742	0.00128	-0.00739	0.99535	-0.89411	0.85855
CNTROB	4.9935	0	4.73888	0	1.38132	0.12491	0.15339	0.99145
RHOC	4.99219	0	3.1805	0	-5.46896	0	-1.37395	0.66905
CHD3	4.97454	0	4.24391	0	3.62735	0	2.53623	0.19831
VAMP5	4.96297	0	2.40367	0.00018	-0.47716	0.65968	1.93833	0.42772
SNRP70	4.96092	0	2.49109	0.00018	0.89072	0.35931	-1.16244	0.7587
AAAS	4.95514	0	3.23882	0	0.87667	0.36818	0.37438	0.96224
AGTRAP	4.95032	0	4.2532	0	1.71859	0.04903	1.48164	0.61915
FBXL15	4.94491	0	2.57969	0	-0.02049	0.98807	0.00733	0.9992
GNL1	4.93889	0	2.31045	0.00032	1.49799	0.09242	1.61618	0.56425
S100A10	-4.92087	0	-4.48093	0	-14.9746	0	-5.40083	0
POLR2I	4.91954	0	2.02969	0.00074	-0.09649	0.94077	-0.63567	0.92182
BLOC1S1	4.91422	0	2.44749	0.00018	-2.36498	0.00739	-0.94927	0.84552
NAB2	4.90968	0	2.83721	0	4.73142	0	0.68065	0.91235
ISYNA1	4.90633	0	3.49798	0	2.55802	0.00385	2.21633	0.30966
FGFR1	4.90194	0	4.33209	0	4.62467	0	1.63933	0.55532
PNKD	4.89406	0	3.89539	0	-1.03433	0.27272	-0.41841	0.95836
PTPRV	4.8782	0	4.1906	0	8.83931	0	1.0605	0.80159
FBXL11	4.87761	0	4.30726	0	3.4504	0.00036	1.7838	0.48996
EIF2B5	4.87352	0	2.81576	0	2.73329	0.00225	-0.17902	0.98894
RABL4	4.87044	0	1.91105	0.00141	3.10835	0.00067	-0.11569	0.99403
PHF15	4.86675	0	2.49917	0.00018	3.32819	0.00036	1.22746	0.73225
RNF167	4.86567	0	2.9712	0	1.45536	0.10308	-0.30539	0.97264
NUP188	4.85784	0	3.70863	0	5.99016	0	2.26389	0.28708
RARA	4.8516	0	6.75667	0	4.46559	0	0.68106	0.91235
UNC119	4.8503	0	2.47526	0.00018	2.78553	0.002	1.3511	0.67959
PLEKHJ1	4.84943	0	4.14459	0	2.78702	0.002	-0.04239	0.9992
EFEMP2	4.84507	0	3.25077	0	-1.17006	0.20686	-0.17707	0.98899
GBF1	4.84215	0	6.62809	0	-0.01273	0.99269	1.86988	0.44807
RUNX1	4.84089	0	5.12031	0	0.90233	0.352	-0.36655	0.96262
HDAC6	4.83519	0	3.62859	0	2.99117	0.00095	-0.33323	0.96777
EFS	4.82109	0	3.58005	0	-0.28416	0.80462	1.64302	0.55532
TSC2	4.81828	0	3.91928	0	2.11579	0.0162	0.27585	0.97912
CST3	4.79743	0	3.40562	0	-0.266	0.81751	0.89038	0.86069
AP1G2	4.79388	0	3.17155	0	6.0349	0	-0.26891	0.98095
PKD1	4.78423	0	3.06807	0	-0.05921	0.96556	-0.0114	0.9992
LTBP4	4.78301	0	4.13604	0	2.34478	0.00777	2.22377	0.30833
NCOR2	4.78156	0	3.00041	0	2.86175	0.00149	1.53615	0.59499
MBOAT5	4.779	0	3.29086	0	3.24933	0.00036	1.13871	0.76642
SAPS1	4.76988	0	2.90661	0	0.8043	0.4162	0.41859	0.95836
FOXP4	4.76936	0	3.28962	0	5.49054	0	1.05562	0.80159
RGL2	4.76929	0	4.04684	0	1.8665	0.03299	0.65259	0.91923
VWF	4.76923	0	3.05218	0	0.32719	0.7745	0.14682	0.99145
GSTP1	4.75619	0	2.21595	0.00032	-3.52804	0	-2.36718	0.24623
PPP2R5D	4.74753	0	2.62394	0	4.08904	0	0.71247	0.90297
PSMB10	4.74142	0	1.71696	0.00402	0.0509	0.96998	-0.87728	0.86533
LASS5	4.73617	0	6.7308	0	-3.52111	0	2.02669	0.39225
NDUFS7	4.73218	0	1.96603	0.00101	-0.12125	0.92259	-0.21315	0.98801
COX5B	4.72621	0	1.67261	0.00499	0.19719	0.86621	-0.6408	0.92182
PER1	4.72335	0	3.59758	0	2.89245	0.00139	1.19519	0.74691
CLTA	4.72328	0	4.90012	0	-2.1199	0.01612	-0.2294	0.9852
ABHD14B	4.71942	0	4.1436	0	2.47148	0.00499	-0.69936	0.90663
TP53I13	4.71557	0	3.60116	0	2.10229	0.01663	0.45522	0.95571
TMEM101	4.71343	0	1.5022	0.01035	6.06652	0	2.29237	0.27991
LONP1	4.70833	0	3.55358	0	0.33258	0.7697	-0.14522	0.99145
VPS28	4.70013	0	4.36491	0	-0.52003	0.62673	-0.00837	0.9992
PH-4	4.6983	0	2.57493	0	3.3144	0.00036	0.14162	0.99145
ATP5D	4.68582	0	2.91066	0	-1.09735	0.23891	-0.71969	0.90289
DHX30	4.68479	0	3.04614	0	1.98303	0.02343	0.55897	0.93738
EMILIN1	4.68071	0	3.95021	0	-1.20981	0.18885	-0.116	0.99403
TNNT3	4.66547	0	4.01652	0	3.46951	0	2.53693	0.19831
ACADS	4.66293	0	1.72989	0.00371	0.90014	0.35312	0.22809	0.9852
KLC1	4.65916	0	4.06263	0	0.5782	0.58281	-0.17549	0.98948
IDH3G	4.64826	0	2.54223	0	-2.69356	0.00273	0.10574	0.99518
ARHGDIA	4.63749	0	3.40505	0	-4.27731	0	-0.77516	0.8941
URM1	4.63425	0	1.97673	0.00101	-0.29283	0.7987	-0.10912	0.99459
BRD2	4.63328	0	1.73295	0.00371	3.63595	0	0.77149	0.8941
RAD23A	4.63283	0	2.29441	0.00032	-0.76151	0.4451	1.06665	0.79785
C1orf160	4.62195	0	6.06341	0	1.42581	0.11193	-1.24523	0.72418
THBS2	-4.61371	0	-5.61027	0	-10.5194	0	-7.26171	0
C9orf16	4.61057	0	4.91954	0	-0.98708	0.29915	-0.29677	0.97429
HTRA1	-4.60672	0	-4.4934	0	-14.6029	0	-6.7399	0
NDUFB11	4.60144	0	1.96235	0.00108	-1.06349	0.25647	-0.73709	0.89823
BCKDK	4.59479	0	2.74591	0	-1.09533	0.24003	-1.04845	0.80444
APBB1	4.58954	0	4.16627	0	-1.5391	0.08207	-0.43417	0.95655
SCAMP3	4.5881	0	1.56306	0.00756	-2.34235	0.00798	-1.11578	0.78081
MLF2	4.58705	0	2.4404	0.00018	3.08733	0.00067	1.39252	0.66128
DAZAP1	4.58304	0	3.5861	0	-0.04321	0.97504	0.85054	0.8767
CDC42EP1	4.56912	0	5.14346	0	1.31049	0.14978	1.29742	0.70492
NDRG2	4.56644	0	3.30427	0	3.11122	0.00067	1.1113	0.78234
GIPC1	4.56092	0	3.62946	0	-1.63007	0.06298	1.87578	0.44761
MCM7	4.56019	0	3.06709	0	1.20436	0.19031	-0.2258	0.9852
OAZ1	4.55829	0	2.50609	0.00018	0.89555	0.35622	0.09364	0.99537
ARD1A	4.55259	0	1.35393	0.01842	-3.47464	0	0.66857	0.91407
SKIV2L	4.55078	0	1.24032	0.03019	0.18085	0.87886	0.45929	0.95311
SEPW1	4.55041	0	3.54155	0	0.05262	0.9693	0.28705	0.97669
CES2	4.53861	0	1.88974	0.00154	0.30666	0.78843	0.26483	0.981
RPS6KB2	4.53607	0	3.55143	0	-1.15029	0.21625	-1.68847	0.53501
COX6B1	4.53288	0	4.35886	0	-0.69438	0.49281	-0.8876	0.86185
TRIM28	4.5214	0	3.80478	0	-0.34626	0.76052	-1.57279	0.58102
RPS16	4.51927	0	3.12409	0	-0.21574	0.85438	-0.52359	0.94237
GRWD1	4.50785	0	3.14469	0	1.05183	0.26303	0.35337	0.96381
SF3B5	4.50251	0	2.29081	0.00032	-0.69305	0.4939	-1.25641	0.71809
ITIH4	4.49718	0	4.1438	0	3.96521	0	1.48357	0.61806
DDX54	4.49497	0	2.15541	0.00047	0.5164	0.62914	-0.18406	0.98894
TNPO2	4.47866	0	4.31711	0	-0.0118	0.99333	0.67471	0.91363
NFIX	4.47647	0	4.70095	0	6.99807	0	4.11439	0.01075
CD151	4.47117	0	2.45483	0.00018	-0.92526	0.33763	0.13552	0.99145
RPS19	4.4657	0	2.26759	0.00032	0.75035	0.45414	0.48672	0.94902
CAD	4.46349	0	2.98282	0	0.97764	0.30451	2.10823	0.3476
MTA1	4.46262	0	3.96091	0	0.19739	0.86621	-0.44095	0.95581
SPRYD3	4.45226	0	1.69573	0.00463	-0.17656	0.88163	-0.67772	0.91245
PML	4.45068	0	5.52467	0	0.6851	0.49938	-1.08346	0.79321
DPP7	4.43872	0	2.34368	0.00026	0.43532	0.69221	1.02673	0.81295
CORO1B	4.43721	0	5.34299	0	-0.74101	0.46094	-0.78522	0.8941
PARC	4.42761	0	2.67845	0	1.44904	0.10502	-0.09735	0.99537
WDR46	4.4237	0	3.11983	0	-1.46596	0.10031	2.04761	0.37882
PSAP	4.42343	0	2.29919	0.00032	-1.33263	0.14157	-2.61859	0.17857
SIRT2	4.42284	0	3.52979	0	-3.41914	0.00036	-0.1228	0.99239
UBTF	4.40558	0	3.06376	0	3.0699	0.00067	1.49907	0.61275
SMARCD3	4.40327	0	2.93663	0	1.63735	0.06141	0.22701	0.9852
PMPCA	4.40322	0	3.04951	0	1.77347	0.04242	0.3253	0.96939
COL8A1	-4.39868	0	-1.09482	0.05109	-5.11114	0	-1.45157	0.63417
CHID1	4.39811	0	2.22801	0.00032	-0.82768	0.39928	0.71927	0.90289
CPSF1	4.39461	0	2.68819	0	2.35276	0.00768	-0.36526	0.96262
PLEKHM2	4.38168	0	4.22934	0	-1.84971	0.03446	-1.33629	0.6874
SPARC	-4.37265	0	-7.67406	0	-8.71579	0	-5.96418	0
TNIP1	4.35688	0	3.18336	0	-0.01011	0.99426	-0.12557	0.99145
FCGRT	4.35066	0	2.84542	0	-1.45127	0.10459	0.02078	0.9992
NUCB1	4.34727	0	2.64091	0	-4.08764	0	0.25993	0.981
ARFGAP1	4.33669	0	3.26254	0	-2.63684	0.00307	-1.49338	0.61275
NAP1L4	4.31644	0	2.35101	0.00018	0.96323	0.31249	0.63882	0.92182
MXD4	4.3082	0	2.51288	0	-2.81287	0.00191	-1.26605	0.71511
C19orf6	4.30797	0	4.39328	0	3.03602	0.00082	0.96892	0.83459
RBM10	4.30693	0	2.23891	0.00032	2.53457	0.00431	0.00595	0.9992
HM13	4.30632	0	2.75957	0	-4.57897	0	-1.41735	0.65272
RAB11FIP3	4.30215	0	5.44992	0	-0.79243	0.4237	0.68653	0.90893
BSCL2	4.30043	0	2.1189	0.00047	2.45037	0.0052	0.38276	0.96082
RGS7	4.30015	0	1.25871	0.0276	-3.33108	0.00036	-0.77731	0.8941
C20orf52	4.29873	0	0.74647	0.20497	-0.45094	0.68039	1.00085	0.82573
WIPI2	4.29508	0	2.84155	0	2.21208	0.01181	-0.97019	0.83459
DMAP1	4.29412	0	1.80965	0.00232	0.98827	0.29875	0.90058	0.85849
NCLN	4.29335	0	3.18041	0	-1.24694	0.17316	-0.14912	0.99145
USP36	4.2918	0	4.20651	0	1.52958	0.08422	-0.58088	0.93596
C6orf47	4.28949	0	1.99814	0.00088	-0.26115	0.82172	0.37599	0.96222
TRAPPC5	4.28746	0	2.27783	0.00032	-1.8854	0.03119	-0.63204	0.92182
FLJ21865	4.27665	0	2.91491	0	1.62682	0.06314	0.18261	0.98894
CLTB	4.27196	0	2.25398	0.00032	-0.9654	0.31159	0.14026	0.99145
RNF40	4.27175	0	3.01832	0	0.21421	0.8557	-0.91838	0.85093
PCOLCE	4.26747	0	2.5689	0	-1.83188	0.03673	-0.6799	0.91235
RXRB	4.2508	0	2.38848	0.00018	1.18762	0.19838	-1.21533	0.73731
NFATC4	4.25013	0	2.23558	0.00032	-0.4701	0.66567	0.59884	0.93179
GSN	4.244	0	4.11613	0	2.05879	0.0185	3.49932	0.03896
TRIM11	4.24121	0	4.18078	0	4.56747	0	1.9163	0.43408
BASP1	-4.21416	0	-3.78372	0	-8.71607	0	-0.8458	0.87692
IFT122	4.20807	0	3.64839	0	3.56657	0	-0.51098	0.94366
KDELR1	4.20166	0	1.8883	0.00154	-4.38813	0	-2.87502	0.11821
PARVA	-4.19831	0	-0.68749	0.24809	-9.46944	0	-4.16234	0.01075
COPS6	4.19796	0	3.02941	0	0.59406	0.57149	-1.17965	0.75298
P117	4.19517	0	1.69574	0.00463	-3.69417	0	-0.92777	0.85013
BLVRB	4.18001	0	2.37851	0.00018	0.11704	0.92544	-2.32206	0.26825
VPS4A	4.1771	0	2.92062	0	0.76345	0.44375	-0.09961	0.99537
USP11	4.16061	0	5.27688	0	5.05682	0	1.00803	0.82316
GAK	4.14797	0	3.87603	0	1.82347	0.03757	0.99241	0.82573
ABL1	4.14562	0	3.00319	0	-0.98485	0.30073	0.54415	0.93969
ITGB5	-4.1188	0	-4.79374	0	-11.1235	0	-5.2225	0
TIMM13	4.11506	0	2.69807	0	-0.47208	0.66407	-0.54204	0.93969
ADAM12	-4.11267	0	-0.61851	0.30226	-8.13888	0	-4.69808	0
LSMD1	4.11245	0	3.05338	0	-0.87663	0.3682	-1.20853	0.74444
CD81	4.09672	0	2.74785	0	0.19792	0.86578	1.02504	0.81412
MRPS34	4.08269	0	1.94936	0.00115	-1.97845	0.02376	0.81215	0.88632
ANKRD13D	4.08004	0	2.80859	0	1.05177	0.26306	-0.73541	0.90033
QARS	4.06058	0	3.99015	0	-0.72306	0.47378	0.71213	0.90297
PPP2R2D	4.05064	0	1.89138	0.00154	0.87333	0.36999	0.96931	0.83459
UNC84B	4.04763	0	1.89878	0.00141	1.44554	0.10583	0.53506	0.94187
COL5A2	-4.03046	0	-1.98892	0.00095	-7.95922	0	-8.31721	0
POSTN	-4.02878	0	-6.6974	0	-6.62543	0	-8.24855	0
NT5C	4.02596	0	1.57031	0.00744	-2.6827	0.00273	-0.45327	0.95581
UQCR	4.02187	0	1.35835	0.01822	-1.08775	0.2434	-0.27008	0.98048
MAPRE3	4.01318	0	4.01427	0	5.01089	0	1.53211	0.59568
PAQR7	4.00678	0	3.64384	0	0.77563	0.43623	0.81002	0.88632
CRTC1	4.00171	0	3.48632	0	1.19534	0.1944	-0.62563	0.92469
TRAPPC2L	4.00108	0	0.78801	0.18055	0.79628	0.42094	-2.3798	0.24281
FKBP2	3.99405	0	3.74895	0	-2.4683	0.00499	-1.23326	0.72825
MRPS2	3.99265	0	2.97759	0	0.15665	0.89669	1.59102	0.57477
SCAP	3.98096	0	3.94965	0	3.03476	0.00082	-0.62769	0.92417
PTPRA	3.97897	0	8.12228	0	-0.04035	0.97636	-0.6802	0.91235
SARM1	3.97804	0	4.68859	0	4.3845	0	0.13146	0.99145
KIAA1683	3.97294	0	3.94517	0	4.26868	0	0.55705	0.93738
LRRC15	-3.97017	0	-3.01047	0	-7.41883	0	-5.526	0
SORCS2	3.96834	0	3.38733	0	1.3453	0.13703	0.02197	0.9992
CTHRC1	-3.9673	0	-3.40571	0	-13.8119	0	-6.96479	0
CENPB	3.96644	0	2.32628	0.00026	-2.69326	0.00273	-0.81825	0.88534
ADAMTS14	-3.96404	0	-3.91573	0	-9.477	0	-0.90561	0.85562
ATP1A1	3.96385	0	3.0758	0	1.02529	0.27774	0.41936	0.95836
C9orf37	3.94847	0	2.9175	0	3.58571	0	0.39246	0.96082
PMM1	3.94793	0	3.18327	0	-0.70177	0.48839	1.0583	0.80159
NCAPH2	3.93736	0	1.981	0.00101	1.50676	0.08991	-0.6954	0.90691
PIGQ	3.93386	0	2.8727	0	1.34341	0.13771	1.30786	0.69881
DGAT1	3.93074	0	2.54992	0	1.15565	0.21368	-0.42728	0.95836
BIN1	3.93054	0	4.75732	0	2.14721	0.0145	0.45751	0.95452
TMED9	3.92975	0	3.32399	0	-1.14691	0.21761	-2.12691	0.33732
P4HB	3.92384	0	1.21571	0.03288	-5.02071	0	-1.3866	0.66418
AP2M1	3.91983	0	2.02775	0.00074	-4.12128	0	-2.0669	0.37025
KLHL22	3.91733	0	3.47775	0	1.97787	0.02376	-0.48928	0.94902
PRDX2	3.9148	0	3.61974	0	0.72575	0.47174	1.6369	0.55532
UROS	3.90039	0	1.72772	0.00376	-2.83224	0.00149	0.19912	0.98827
CXCL14	-3.88688	0	-6.82571	0	-5.79865	0	-6.7239	0
NARF	3.88411	0	3.53875	0	-0.52319	0.62443	-1.04876	0.80444
NMT1	3.87917	0	3.85042	0	0.56523	0.59268	-0.23838	0.98435
SEMA7A	3.87195	0	4.0382	0	2.33528	0.00818	-0.15952	0.99137
DCXR	3.86787	0	3.24192	0	-0.57672	0.58374	-0.48111	0.94953
IGFBP6	3.86401	0	2.83812	0	1.00816	0.28657	0.76324	0.89622
SAPS2	3.85887	0	4.31566	0	0.68034	0.50384	0.38846	0.96082
SPON2	3.85869	0	3.43305	0	-0.33586	0.76803	-0.66329	0.91673
C11orf2	3.85476	0	3.3732	0	-0.36446	0.7471	1.41297	0.65272
MIDN	3.81836	0	4.72965	0	-1.87342	0.03254	-0.0935	0.99537
PFKL	3.81773	0	2.5572	0	-4.25525	0	-5.26396	0
TNFRSF12A	-3.81437	0	-2.25539	0.00032	-11.3656	0	-0.62251	0.925
ARL4C	-3.81241	0	-3.4434	0	-10.3871	0	-5.19598	0
PABPN1	3.81218	0	1.97078	0.00101	0.49113	0.64803	0.15882	0.99137
UBL7	3.81111	0	2.34171	0.00026	-0.95819	0.31539	0.38444	0.96082
LOC91316	3.80775	0	2.57097	0	1.54709	0.08037	-0.18885	0.98894
SQSTM1	3.79929	0	1.63734	0.00581	-0.66006	0.52085	-0.21839	0.98629
NKD2	-3.79363	0	-3.41391	0	-6.50979	0	-1.70677	0.5287
MRPL4	3.78457	0	2.36681	0.00018	1.74719	0.0449	0.3688	0.96224
TUBGCP2	3.77886	0	2.93439	0	1.4613	0.10104	0.03966	0.9992
GNB2	3.77317	0	2.43946	0.00018	-0.73281	0.46559	0.05959	0.99689
RBMX	3.76508	0	1.21402	0.03308	2.29911	0.00889	-0.13352	0.99145
H1FX	3.7618	0	4.08209	0	0.44773	0.68258	1.57002	0.58102
FLYWCH1	3.75999	0	3.37708	0	2.89276	0.00139	0.36733	0.96224
TLE2	3.75618	0	3.03746	0	3.59657	0	-0.50639	0.94456
CLSTN1	3.75568	0	4.00488	0	-1.70801	0.05037	-0.78782	0.8941
ATP5I	3.75346	0	1.21533	0.03292	-0.89772	0.3549	-0.38802	0.96082
SNRPB	3.75318	0	2.01757	0.00088	3.51461	0	1.61714	0.56425
USP5	3.74918	0	2.33142	0.00026	-1.81569	0.03825	-1.8903	0.44176
CENTG3	3.74758	0	3.47824	0	3.45255	0.00036	-0.07183	0.99626
SPSB3	3.74687	0	2.19639	0.0004	0.57948	0.58189	-0.01309	0.9992
CTSA	3.7462	0	6.12596	0	-3.42802	0.00036	-0.8507	0.8767
COL5A1	-3.74594	0	-4.8214	0	-8.24472	0	-6.63681	0
HGS	3.7392	0	2.43371	0.00018	-1.36196	0.1308	0.22871	0.9852
EIF4G1	3.7276	0	4.75145	0	-1.38301	0.12412	-0.70779	0.90411
PSMB8	3.72548	0	1.12172	0.0464	0.8784	0.36717	0.78575	0.8941
TRPC4AP	3.72121	0	3.61627	0	-1.37292	0.12714	-1.04944	0.80444
MGMT	3.70907	0	3.79807	0	1.43361	0.10997	-0.17543	0.98948
UBE2J2	3.70614	0	3.10142	0	-1.46368	0.10065	0.45463	0.95581
TSPAN17	3.70269	0	1.86526	0.0016	-1.62498	0.06335	0.26245	0.981
PHC2	3.70126	0	1.94466	0.00122	-1.60014	0.06844	-0.89788	0.85849
MIF	3.68874	0	1.48934	0.0108	-3.3678	0.00036	0.25326	0.98171
MFAP4	3.67325	0	2.62396	0	-0.34412	0.76191	-0.79353	0.89117
ARF5	3.66256	0	4.39113	0	0.41332	0.70967	0.19382	0.98894
CD320	3.66155	0	4.23079	0	3.6433	0	0.29748	0.97429
CDC42EP4	3.65908	0	3.19844	0	7.15652	0	1.45965	0.62934
WDTC1	3.65799	0	4.7977	0	2.0179	0.02119	1.2755	0.71385
ECSIT	3.65288	0	3.718	0	2.20563	0.0121	-0.5463	0.93969
CCDC130	3.65231	0	2.38832	0.00018	0.94471	0.32501	0.45158	0.95581
MAP3K12	3.64449	0	2.32103	0.00026	3.8941	0	1.73835	0.5139
NOSIP	3.64077	0	1.93375	0.00128	-0.58266	0.57982	1.25914	0.71735
FHOD3	-3.63579	0	-0.46825	0.42204	-7.78632	0	-1.61712	0.56425
TFEB	3.63297	0	2.16014	0.00047	0.48516	0.65333	-0.33964	0.96708
RFX1	3.6309	0	3.40786	0	0.37384	0.74031	-0.01739	0.9992
RAB34	3.63076	0	2.44377	0.00018	1.83959	0.0361	0.01343	0.9992
ATP13A1	3.62896	0	4.03174	0	1.36001	0.13188	-0.37258	0.96224
TMUB2	3.62242	0	2.3336	0.00026	-0.43997	0.68893	0.94595	0.84552
SULF1	-3.61965	0	-1.04554	0.06316	-10.1654	0	-6.08734	0
MAP3K11	3.61702	0	3.21921	0	0.99909	0.29186	-0.43594	0.95581
U2AF2	3.61426	0	4.07995	0	1.11055	0.23202	0.35456	0.96289
AKT1	3.6098	0	1.68074	0.00481	-0.52684	0.62109	-1.27743	0.7135
RAB31	-3.60903	0	-1.32452	0.02087	-10.0412	0	-4.75212	0
INHBA	-3.5994	0	-3.23425	0	-5.15374	0	-1.88275	0.44726
ARRDC2	3.59754	0	2.82748	0	1.79877	0.0399	2.14185	0.33354
CC2D1A	3.5926	0	3.01187	0	0.31377	0.78372	-0.0488	0.99875
FXYD5	3.59214	0	3.38028	0	2.35245	0.00768	1.00972	0.82298
EIF4A1	3.56997	0	1.69988	0.00445	-1.99053	0.0229	-0.70389	0.90663
STK11	3.56899	0	2.76124	0	-2.32074	0.00843	-0.08331	0.99626
PDGFD	3.56787	0	4.36563	0	5.16981	0	1.65362	0.55245
SFXN5	3.56606	0	2.57014	0	1.72282	0.04838	0.04772	0.99904
PSMD13	3.5658	0	2.74878	0	-0.06326	0.96236	-1.00811	0.82316
PTN	-3.56354	0	-3.11457	0	-3.86191	0	-0.1406	0.99145
SDC1	-3.56321	0	-5.76837	0	-6.94138	0	-2.21447	0.30966
HEXDC	3.56085	0	2.47357	0.00018	2.13272	0.01512	0.6572	0.91803
GRAMD1A	3.55146	0	4.05244	0	-2.11689	0.01612	-0.10532	0.99518
CXXC1	3.55094	0	2.17806	0.00047	-0.21608	0.85426	-1.51043	0.60608
PIP5K1C	3.54729	0	3.51812	0	-2.0555	0.01856	1.14311	0.76605
HKR1	3.5472	0	5.35652	0	1.69428	0.05189	1.06964	0.79744
RFNG	3.54471	0	1.87094	0.0016	-2.12069	0.01604	-0.08236	0.99626
FAF1	3.54211	0	2.77507	0	4.54226	0	0.04708	0.99908
TCN2	3.53942	0	1.34846	0.01881	1.47653	0.09747	-0.12781	0.99145
ARHGEF19	-3.53801	0	-2.7389	0	-7.55117	0	-1.75641	0.50216
IGFBP4	3.53051	0	3.86319	0	1.31631	0.14705	2.14511	0.33354
NUDT16L1	3.52523	0	2.65684	0	1.85138	0.03441	-0.46406	0.95229
GPR108	3.523	0	2.33035	0.00026	1.65778	0.05841	1.24984	0.72186
MAMDC4	3.52232	0	2.08534	0.00061	-4.51468	0	-2.34815	0.2578
C16orf48	3.51637	0	2.21258	0.00032	2.78991	0.002	0.31558	0.97076
ZNF469	-3.50506	0	-4.03436	0	-6.47907	0	-1.27695	0.7135
AMT	3.50055	0	2.74484	0	2.95721	0.00095	1.73427	0.5139
PDZRN3	-3.49931	0	-1.02365	0.06884	-3.81209	0	-2.18558	0.31932
DHCR24	3.49732	0	1.55398	0.00784	3.10897	0.00067	0.36856	0.96224
KIAA0152	3.49272	0	0.87856	0.12779	-1.8625	0.03314	-0.4444	0.95581
BAD	3.49269	0	3.86087	0	-3.26308	0.00036	-0.57561	0.93629
SETD1A	3.48701	0	1.85347	0.0018	-0.27345	0.81286	1.98455	0.40959
TBRG4	3.48265	0	2.32433	0.00026	2.8169	0.00191	-0.07919	0.99626
CHD8	3.47241	0	4.22593	0	1.74772	0.0449	-0.0304	0.9992
BRF1	3.46171	0	2.18738	0.00047	-0.25055	0.82885	0.61772	0.92562
ZGPAT	3.46105	0	2.66141	0	-0.73206	0.46586	-1.78651	0.48805
MRPL41	3.45219	0	1.61623	0.00633	-4.79773	0	0.1015	0.99537
USP4	3.45148	0	2.40827	0.00018	1.77231	0.04247	-0.87068	0.86866
NUBP2	3.44979	0	1.66493	0.0053	-1.96273	0.02469	-0.73998	0.89823
IHPK1	3.44828	0	3.40829	0	-0.54468	0.60838	-1.71436	0.52246
KIAA0182	3.44645	0	3.71608	0	12.6379	0	4.62814	0
IER5L	3.44604	0	2.52101	0	1.73847	0.04596	-0.28922	0.97669
UBE2M	3.44283	0	2.70065	0	-1.69444	0.05189	-1.20055	0.74691
LOC126520	3.43992	0	2.20592	0.00032	7.53978	0	1.4338	0.64646
LAMB2	3.43759	0	2.22981	0.00032	-4.85794	0	0.11226	0.99449
NBL1	-3.43608	0	-4.38666	0	-14.7354	0	-6.22192	0
DCI	3.43244	0	1.52529	0.00926	0.87757	0.36731	-0.54521	0.93969
C1QTNF3	-3.4294	0	-5.1272	0	-7.02774	0	-3.88629	0.01869
HN1	3.42686	0	3.52697	0	-7.41893	0	-2.38376	0.24182
EZH1	3.42186	0	4.47663	0	4.37827	0	1.96844	0.4153
GRN	3.42057	0	3.48721	0	-1.71221	0.04978	-0.8224	0.88408
PMF1	3.41689	0	2.07294	0.00061	0.2561	0.82484	-0.95087	0.84495
CPSF3L	3.4137	0	2.63235	0	-3.58464	0	-3.14203	0.07265
MRPL24	3.41322	0	1.11864	0.04679	1.23729	0.17745	0.15649	0.99137
PPIC	-3.41008	0	-3.50355	0	-8.64032	0	-0.85921	0.87323
COL6A2	-3.41004	0	-4.08383	0	-4.9331	0	-3.70571	0.02985
MAFB	-3.40926	0	-3.74636	0	-10.4556	0	-6.6615	0
AP3S2	3.40904	0	3.63967	0	2.51066	0.00463	-0.43476	0.95653
CTDSPL	3.40277	0	3.1787	0	8.61341	0	1.83401	0.4673
OLFML2B	-3.40158	0	-3.77902	0	-7.97971	0	-2.23003	0.30725
SPON1	-3.40047	0	-0.26072	0.72584	-4.56656	0	-3.82797	0.01869
AKT2	3.39351	0	2.99378	0	2.8313	0.00149	0.31246	0.97109
PRPF31	3.39291	0	1.72517	0.00376	2.869	0.00149	0.39151	0.96082
RPS14	3.39244	0	1.19344	0.03547	1.08146	0.24736	-0.71257	0.90297
FLNC	-3.38769	0	-3.20427	0	-11.3251	0	-3.74025	0.02542
TNC	-3.38514	0	-2.62882	0	-7.90306	0	-3.14513	0.07265
AHDC1	3.38331	0	2.62732	0	5.68214	0	2.26261	0.28708
UNK	3.37514	0	1.49055	0.01075	2.6429	0.00296	-0.52573	0.94226
ABCB6	3.37261	0	2.83765	0	0.79488	0.42212	0.60671	0.92764
CSMD2	-3.3688	0	0.24134	0.75257	-10.0917	0	-1.32836	0.69032
NR3C1	3.36866	0	3.62042	0	9.21807	0	2.78381	0.13372
TSSC4	3.36266	0	2.35343	0.00018	-0.45621	0.67572	-1.20993	0.74304
NXN	-3.36016	0	-0.74856	0.20344	-3.39389	0.00036	-2.548	0.19372
C19orf50	3.35261	0	1.83281	0.00206	0.78818	0.42729	-2.02379	0.39282
PIN1	3.35044	0	2.09344	0.00061	-1.55888	0.07776	-1.06527	0.79973
NOV	-3.35041	0	-3.09363	0	-7.25056	0	-0.65838	0.91803
BAT1	3.34946	0	1.47478	0.01153	3.60606	0	-0.02749	0.9992
C17orf49	3.33842	0	1.26131	0.02717	-2.59114	0.00341	-0.62533	0.92469
PRPF8	3.33772	0	1.6316	0.00581	2.37711	0.00717	0.85739	0.8739
PTPRS	3.33675	0	4.00789	0	0.65362	0.5252	0.3477	0.96494
DPT	-3.33459	0	-3.84163	0	-2.77875	0.002	-2.50802	0.20654
LOC51035	3.33376	0	0.13641	0.88048	2.69077	0.00273	-0.7888	0.89329
ZFPM1	3.32862	0	1.92398	0.00135	-0.94153	0.32759	-0.38222	0.96082
TCEA2	3.32783	0	1.49256	0.01063	0.83043	0.39752	-1.4112	0.65396
NUMBL	3.32315	0	2.79089	0	4.67616	0	-0.5391	0.94016
C20orf149	3.32167	0	3.36038	0	-2.7551	0.002	-2.22233	0.30833
KIF26B	-3.32038	0	-0.66949	0.26066	-4.5844	0	-0.33847	0.96708
PLP2	-3.32005	0	-2.34161	0.00026	-7.94013	0	-1.90695	0.43734
CILP2	-3.30511	0	-3.36585	0	-2.66968	0.00273	-1.06113	0.80159
FAM53B	3.30243	0	3.41733	0	0.55219	0.60181	-0.6109	0.92681
TUBGCP6	3.30111	0	2.59524	0	3.12785	0.00067	0.69674	0.90663
TXLNA	3.2981	0	-0.41572	0.49119	1.6137	0.06488	-1.0655	0.79928
PSMD8	3.28456	0	2.82957	0	-0.90112	0.35256	-1.20621	0.74511
PDGFRL	-3.28095	0	-2.57454	0	-4.93101	0	-1.19104	0.74691
SUV420H2	3.27717	0	2.99403	0	3.45458	0.00036	-0.65195	0.91923
ADAMTS2	-3.27582	0	-2.55014	0	-13.3096	0	-1.63053	0.55789
ANTXR1	-3.27283	0	0.28961	0.68076	-5.66596	0	-5.04361	0
MSRB3	-3.269	0	-0.73244	0.21439	-4.85539	0	-2.29123	0.27991
RTN2	3.25542	0	2.72829	0	2.82452	0.00163	0.2006	0.98827
USP40	3.25091	0	1.98809	0.00101	1.30373	0.15171	0.95329	0.84384
ATP10A	-3.24938	0	-2.24024	0.00032	-9.79542	0	-0.44349	0.95581
GTF3C5	3.24509	0	2.27183	0.00032	1.18499	0.19955	0.33541	0.96777
ABLIM1	3.24233	0	4.17762	0	6.56017	0	1.43739	0.64385
CPNE1	3.24147	0	1.35467	0.01838	2.18021	0.01308	0.69755	0.90663
NDUFB10	3.23952	0	1.61936	0.00623	-2.55765	0.00385	-2.0249	0.39282
TPM2	3.23537	0	2.4493	0.00018	-2.53385	0.00431	0.39345	0.96082
FAM128B	3.23438	0	2.62189	0	-0.67433	0.50822	-2.32173	0.26825
GABBR1	3.22385	0	3.9022	0	1.7957	0.03996	0.94181	0.84594
PFN1	3.22335	0	0.38233	0.54426	-5.38771	0	-3.0093	0.0947
FPGS	3.22152	0	2.52798	0	0.70951	0.48278	1.20444	0.74659
SNRPA	3.21815	0	2.6529	0	3.43668	0.00036	-0.57816	0.93596
HMCN1	-3.21784	0	-0.50653	0.39291	-6.20006	0	-2.07809	0.35998
SMPD1	3.21526	0	1.74745	0.00333	-4.03974	0	-1.2196	0.73532
EYA2	-3.21304	0	-0.45842	0.43328	-6.77369	0	-1.00358	0.82453
ASCC2	3.20747	0	2.12697	0.00047	0.208	0.85927	1.61159	0.56661
MARCKSL1	-3.20713	0	-2.93949	0	-5.74983	0	-3.76178	0.02542
ALG3	3.20668	0	1.22821	0.03181	-1.14265	0.21865	-0.92268	0.85053
HNRPUL2	3.2064	0	4.45102	0	3.04074	0.00067	0.28294	0.97723
C1QB	3.20057	0	2.05218	0.00068	-0.29483	0.79747	0.41816	0.95836
TNKS1BP1	3.19898	0	6.19554	0	0.54377	0.60862	-0.06467	0.99638
EXOC7	3.19891	0	1.45191	0.01258	0.52621	0.62167	1.87826	0.44741
C22orf32	3.19805	0	1.24887	0.02871	4.03918	0	0.78232	0.8941
LOC201229	3.19624	0	1.774	0.00276	9.98781	0	2.11334	0.34593
CLN6	3.19274	0	3.04482	0	0.80545	0.41509	1.49105	0.61275
SAMM50	3.19214	0	1.05659	0.06021	-0.51872	0.62742	0.8574	0.8739
ZNFX1	3.18501	0	1.18257	0.03694	-1.01439	0.28312	-0.17283	0.98965
COLEC12	-3.18371	0	-0.63721	0.28706	-10.3787	0	-5.01285	0
ATP13A2	3.18029	0	1.42665	0.01371	-1.58614	0.07165	0.3652	0.96262
ZNF580	3.17169	0	3.18976	0	-0.10164	0.93784	-0.42185	0.95836
PLEKHA4	3.16725	0	4.66539	0	3.42402	0.00036	0.78962	0.89316
GDF11	-3.16502	0	-2.91596	0	-6.08396	0	0.2067	0.98827
RPL28	3.15934	0	1.41644	0.01438	0.14992	0.90105	-1.19233	0.74691
PTPN7	3.15226	0	2.06331	0.00061	5.97367	0	0.59712	0.93179
ITPKC	3.15176	0	3.17284	0	4.41717	0	2.17115	0.32417
FOXRED1	3.15016	0	2.7623	0	2.31573	0.00853	-0.28151	0.97723
MAPK11	3.15003	0	2.45736	0.00018	-1.20711	0.18943	-0.29633	0.97429
TENC1	3.143	0	3.19368	0	1.91533	0.02877	2.42753	0.23098
DGCR8	3.14259	0	2.32615	0.00026	-0.48881	0.65057	-0.36309	0.96262
PLEKHA5	3.14143	0	4.5621	0	6.74192	0	4.00335	0.01075
NKD1	-3.13948	0	-3.23788	0	-4.78546	0	-0.93086	0.84926
NUAK1	-3.13506	0	-3.35982	0	-5.81838	0	-5.71598	0
ITGA11	-3.12943	0	-3.32739	0	-9.36601	0	-2.70643	0.15559
SLC38A5	-3.1286	0	-3.43035	0	-1.74147	0.0453	-0.56827	0.93738
ADAMTS12	-3.12142	0	-0.18942	0.82465	-5.42086	0	-1.41321	0.65272
GNAI2	3.11889	0	2.12378	0.00047	-6.06794	0	0.0006	0.99992
PMP22	-3.11868	0	-3.08948	0	-9.64145	0	-3.25591	0.06
UCK1	3.1154	0	2.30784	0.00032	0.16858	0.88771	1.40921	0.65542
SSNA1	3.11424	0	1.03404	0.06566	-1.70627	0.05057	0.21912	0.98623
F2R	-3.11225	0	-3.20574	0	-7.60718	0	-0.32579	0.96939
DDB1	3.10725	0	2.39673	0.00018	1.59648	0.06914	-1.68569	0.53625
MARK2	3.10592	0	2.22429	0.00032	1.19361	0.19566	-0.83394	0.88071
NNMT	3.10568	0	1.00797	0.07403	-3.16935	0.00067	-0.57893	0.93596
RCN1	-3.10486	0	-2.87966	0	-6.47293	0	-2.07376	0.36441
KHSRP	3.10164	0	1.72335	0.00376	1.6165	0.06431	1.09287	0.79022
FSTL3	3.09792	0	2.49117	0.00018	-3.13063	0.00067	0.60278	0.93009
WDR45	3.0964	0	1.4065	0.01511	0.84276	0.38952	0.33396	0.96777
SHMT2	3.09092	0	2.24762	0.00032	-1.45789	0.1025	1.67252	0.54092
GLTSCR2	3.08977	0	3.86768	0	3.75653	0	1.07095	0.79722
ANAPC11	3.08858	0	1.00025	0.0768	-1.96695	0.02437	-0.97668	0.83297
RPLP2	3.08829	0	3.64858	0	-1.12397	0.22642	-0.28006	0.97782
ACTN4	3.08687	0	3.21126	0	-5.95057	0	-2.23138	0.30714
GAS7	-3.08527	0	-0.74359	0.20697	-9.16045	0	-1.55018	0.58858
C11orf67	3.07873	0	2.35031	0.00018	0.3294	0.77265	0.5913	0.93206
C21orf2	3.07764	0	2.02672	0.00074	1.96217	0.02486	0.69703	0.90663
ITGA5	-3.07744	0	-2.26905	0.00032	-8.05106	0	-1.07172	0.79722
LRP10	3.06969	0	2.20753	0.00032	-1.53936	0.08188	0.23525	0.98503
FBLN1	3.06559	0	3.66994	0	-0.36275	0.74831	-0.42975	0.9583
FDXR	3.06459	0	3.31446	0	3.04697	0.00067	2.19448	0.31709
LPHN1	3.06416	0	3.33617	0	2.31445	0.0086	1.19985	0.74691
ProSAPiP1	-3.064	0	-2.74061	0	-4.09433	0	-0.2297	0.9852
ZNF503	-3.06208	0	-2.71024	0	-4.29034	0	-3.12444	0.07265
CNTN1	-3.05955	0	0.02511	0.98001	-3.32092	0.00036	-2.84094	0.11912
TSPAN18	-3.05947	0	-3.03992	0	-7.51494	0	-0.88257	0.86233
COL12A1	-3.05395	0	-1.97287	0.00101	-3.10441	0.00067	-4.42991	0
RBP1	3.05197	0	1.43832	0.01306	5.40573	0	0.58249	0.93574
GPNMB	-3.04738	0	-3.57737	0	-7.91616	0	-2.75636	0.14103
RPL36	3.04615	0	0.98435	0.08161	0.3039	0.79081	0.62777	0.92417
ZYX	3.04171	0	3.20901	0	-2.07712	0.01771	-0.05147	0.99804
MRPL28	3.03605	0	1.94577	0.00122	-0.3339	0.76929	0.37395	0.96224
CIZ1	3.02899	0	1.72263	0.00389	-0.02812	0.98331	-1.07383	0.79722
LRPAP1	3.02668	0	0.47325	0.4177	0.65429	0.52479	0.302	0.97294
CDK5RAP2	3.02271	0	4.19508	0	4.01928	0	2.5414	0.19742
CCHCR1	3.02141	0	2.66838	0	2.23388	0.01111	-0.48623	0.94902
MYO10	-3.01916	0	-0.44656	0.44732	-5.61995	0	-1.03252	0.81042
STK11IP	3.0188	0	2.30334	0.00032	2.30817	0.0086	-0.0626	0.99638
APCDD1	-3.01816	0	-3.29114	0	-5.75747	0	-3.29036	0.05699
CHST6	-3.01684	0	-3.47775	0	-6.25674	0	-3.6246	0.02985
PRELP	-3.01573	0	-2.95419	0	-2.05532	0.01856	-0.57149	0.93706
CNTNAP1	3.01549	0	2.92588	0	2.3589	0.00758	2.55426	0.19365
CD276	-3.01338	0	-2.39402	0.00018	-11.1993	0	-1.34601	0.68198
TCF25	3.00908	0	3.58135	0	1.43388	0.10988	0.45712	0.95452
PRKACA	3.00904	0	3.69911	0	0.73992	0.46161	1.76064	0.49855
KLF16	3.00838	0	2.9027	0	2.73332	0.00225	-2.54956	0.19372
NINJ1	3.00766	0	3.89424	0	-0.10148	0.93794	-0.02924	0.9992
PHYHIP	3.00765	0	4.14229	0	11.2147	0	1.32645	0.69179
MADD	3.00674	0	2.57717	0	3.1491	0.00067	-0.2851	0.97669
LHFP	-2.99938	0	-0.21142	0.79556	-4.91666	0	-1.22067	0.73532
NCAM2	2.99903	0	4.08252	0	9.39789	0	3.99876	0.01075
CHRD	-2.99187	0	-3.16827	0	-11.1841	0	-2.63811	0.17397
HNT	-2.99121	0	0.45653	0.43697	-5.88187	0	-1.18402	0.7489
RNH1	2.99009	0	3.41777	0	0.20629	0.85979	-0.30185	0.97305
ZNF521	-2.98846	0	-0.02532	0.98001	-6.48984	0	-3.20339	0.06604
BMP7	-2.98694	0	-3.62731	0	-8.08249	0	-1.19049	0.74691
KIAA0802	-2.98581	0	-1.7846	0.00263	-4.53215	0	-1.87493	0.44761
FAM100A	2.98407	0	1.64412	0.00557	-0.52715	0.62097	0.58195	0.93596
SNF8	2.98157	0	3.01208	0	-1.75344	0.0443	-0.48618	0.94902
HLA-E	2.97459	0	1.8794	0.00154	-0.18018	0.87915	0.17872	0.98894
STC2	-2.97402	0	-2.43907	0.00018	-3.694	0	0.25899	0.98105
LOC554202	-2.97368	0	-1.67534	0.00493	-1.37864	0.12558	0.37124	0.96224
IQSEC3	2.97203	0	3.95021	0	6.73693	0	1.31683	0.69631
C20orf116	2.96867	0	0.76036	0.19487	1.69756	0.05145	-0.03406	0.9992
IFI35	2.96814	0	1.18237	0.037	0.32671	0.7746	-0.10507	0.99518
LIMD2	2.96751	0	1.54568	0.00837	2.48697	0.00489	-0.81931	0.88513
WISP1	-2.96654	0	-3.33276	0	-8.04811	0	-2.63892	0.17397
PITX2	-2.96472	0	-2.86502	0	-2.11637	0.0162	-0.01354	0.9992
CEP164	2.96259	0	3.95966	0	-0.03322	0.98045	2.19225	0.31782
TIMM50	2.96206	0	1.2166	0.03284	0.12345	0.92091	0.36942	0.96224
FUS	2.96071	0	0.51327	0.38646	1.27535	0.16223	1.49932	0.61275
ABBA-1	-2.95983	0	-3.1297	0	-4.74835	0	-1.43349	0.64646
PPAPDC1A	-2.95911	0	-2.6165	0	-5.83811	0	-3.85194	0.01869
ENG	2.95738	0	2.70886	0	-1.31978	0.14624	0.47519	0.95143
DUOXA1	-2.95591	0	-2.87274	0	-6.29222	0	-0.84312	0.87858
ZBTB7C	2.95591	0	3.2789	0	7.53708	0	-0.83246	0.88099
HSPB6	2.95345	0	2.56125	0	4.98213	0	2.2227	0.30833
P4HA2	-2.94983	0	-3.336	0	-6.65223	0	-1.54654	0.58888
MPZL1	-2.94932	0	-2.35459	0.00018	-4.95015	0	-0.87998	0.86351
SH3BP1	2.94458	0	2.18086	0.00047	3.51441	0	-0.04195	0.9992
ING4	2.94436	0	1.40879	0.01505	2.27983	0.00968	-0.06985	0.99636
SRCAP	2.93843	0	2.79902	0	2.0729	0.01779	-1.29627	0.70492
TANC1	-2.93456	0	-0.38486	0.54013	-3.74957	0	-2.52275	0.19958
CDH23	-2.93294	0	-0.60231	0.3099	-4.46386	0	-1.59546	0.57236
C9orf5	2.93277	0	2.79229	0	4.65325	0	0.50006	0.94675
SLC9A3R2	2.93256	0	2.7395	0	2.41339	0.00615	1.17769	0.75328
MLL	2.93026	0	4.27814	0	0.69027	0.49604	0.80995	0.88632
FOXQ1	-2.92779	0	-2.97095	0	-5.73736	0	-1.5268	0.6001
P4HA3	-2.92661	0	-3.63001	0	-6.56791	0	-1.41566	0.65272
CDGAP	-2.92458	0	-1.35432	0.01838	-6.18322	0	-1.47938	0.6206
CABLES1	-2.92405	0	-1.15648	0.04007	-4.26375	0	-0.68701	0.90893
ANKRD54	2.92025	0	2.68774	0	-0.01076	0.99382	-1.19947	0.74691
GALNT5	-2.91479	0	-2.57691	0	-3.11398	0.00067	-2.87536	0.11821
STYXL1	2.91265	0	3.41588	0	2.44391	0.00553	-1.08726	0.79321
PTPRU	-2.90897	0	-1.98887	0.00095	-2.39249	0.00653	-0.12229	0.99258
MAN2B1	2.90833	0	2.40664	0.00018	-2.31874	0.00843	-2.05635	0.37638
DPM2	2.90782	0	2.4938	0.00018	-1.82931	0.03705	-1.54453	0.58896
REXO1	2.90604	0	3.83333	0	1.45882	0.10218	-0.78993	0.89316
PNKP	2.90535	0	1.85628	0.00173	2.42438	0.00584	0.15478	0.99145
KCNJ12	-2.9033	0	-3.04151	0	-7.33662	0	-0.95377	0.84384
MX2	-2.89848	0	-2.63091	0	-5.84306	0	-1.9841	0.40959
GALNT10	-2.8978	0	-0.28071	0.69655	-6.82013	0	-1.30347	0.69956
FARP1	-2.89722	0	-0.38834	0.53439	-8.00955	0	-3.48538	0.03896
PODN	-2.89451	0	-2.85251	0	-8.16964	0	-0.02254	0.9992
PRDX4	-2.89261	0	-2.97511	0	-8.78316	0	-1.57067	0.58102
CAMTA2	2.88972	0	1.9088	0.00141	-2.35457	0.00758	-2.44998	0.2265
ANPEP	-2.88861	0	-3.32397	0	-9.69978	0	-0.14637	0.99145
SYT1	2.88733	0	3.97397	0	8.78714	0	1.48978	0.61275
ID4	-2.88466	0	-2.72147	0	-3.70687	0	-0.04226	0.9992
TBX1	-2.8795	0	-3.29344	0	-1.9904	0.0229	-0.40638	0.96082
TMEFF1	-2.87941	0	-1.12476	0.04595	-7.11011	0	-0.63365	0.92182
RASA3	-2.87741	0	-2.78546	0	-8.26942	0	-4.9615	0
FZD1	-2.87694	0	-4.01091	0	-8.45964	0	-4.50951	0
VDR	-2.87547	0	-2.94583	0	-5.94637	0	0.39387	0.96082
LOC91461	2.87469	0	2.03383	0.00074	5.38814	0	3.60823	0.02985
DYNLRB1	2.8688	0	1.22895	0.03178	0.19123	0.87038	-1.72536	0.51787
MYO1E	-2.86874	0	0.35613	0.58001	-10.4384	0	0.64676	0.92141
TMEM16D	-2.86851	0	0.02585	0.97976	-10.8686	0	-1.49945	0.61275
AHR	-2.8681	0	-3.88387	0	-8.32541	0	-7.49599	0
PIK3R1	2.86747	0	3.37517	0	2.99281	0.00095	0.9888	0.82766
PDLIM3	-2.86574	0	-3.22146	0	-9.32759	0	-0.3488	0.96475
NDUFS3	2.86336	0	1.12237	0.04624	0.3404	0.76489	0.24872	0.9819
ZFP41	2.86146	0	1.72594	0.00376	1.9697	0.02433	-0.96174	0.83887
EMID1	-2.86089	0	-2.80489	0	-5.28696	0	-0.53847	0.94024
AMPH	-2.85917	0	-1.24869	0.02871	-5.6725	0	-2.66431	0.16792
PPP3CA	2.85902	0	3.81211	0	4.52675	0	2.16924	0.32439
NQO2	2.85791	0	1.43881	0.01306	0.01859	0.98945	-0.2145	0.9875
LMBR1L	2.85541	0	4.04137	0	2.76031	0.002	0.67219	0.91394
EML1	-2.85384	0	-1.48858	0.0108	-5.81837	0	-0.85381	0.87548
ZFYVE19	2.85244	0	2.00193	0.00088	-1.01924	0.28069	0.80702	0.88632
RAI14	-2.85014	0	-1.2601	0.02722	-6.04709	0	-3.09173	0.07917
C1QA	2.8471	0	2.28968	0.00032	-0.43143	0.69479	-0.51996	0.94237
UCHL1	-2.84571	0	-2.9442	0	-9.23051	0	0.07498	0.99626
RHOBTB1	-2.84479	0	-0.97778	0.08385	-1.02916	0.27572	0.00042	0.99992
ARHGAP10	2.84455	0	3.1999	0	5.15393	0	-0.96614	0.83714
VILL	2.84367	0	1.58846	0.00686	6.76495	0	-0.06466	0.99638
HLA-DMA	2.84268	0	1.51974	0.00979	-0.33899	0.76595	-0.08054	0.99626
PPP1R12C	2.8422	0	1.79187	0.00257	-1.05193	0.263	-1.49474	0.61275
ZNF787	2.84053	0	2.1885	0.00047	-2.00677	0.02241	0.18146	0.98894
FAM38B	-2.83993	0	-3.46117	0	-9.23296	0	-3.34579	0.05028
S100B	-2.83885	0	-2.83621	0	-3.72361	0	-0.30875	0.97192
TEAD4	-2.83731	0	-1.85989	0.00166	-1.75767	0.04379	1.41919	0.65272
ANXA2	-2.83623	0	-2.2235	0.00032	-8.21622	0	-3.80446	0.02294
SPEG	-2.83556	0	-1.81088	0.00232	-3.97833	0	-1.17232	0.75566
SBNO2	2.83406	0	2.95077	0	-2.29338	0.00931	-0.33719	0.96765
LGR4	-2.83315	0	-1.2174	0.0328	-6.29414	0	-3.36344	0.05028
DIRAS1	-2.83269	0	-3.27949	0	-3.82287	0	-1.04732	0.80444
SMARCD2	2.83262	0	4.09476	0	3.60975	0	1.97066	0.4153
SYT7	2.83158	0	5.78328	0	12.4144	0	3.1128	0.07595
MUC20	2.83082	0	1.82693	0.00206	5.46008	0	0.41355	0.95953
COL15A1	-2.8305	0	-2.86864	0	-5.81606	0	-3.04426	0.08915
BOC	2.82899	0	1.8812	0.00154	2.40228	0.00635	0.25829	0.98117
SAT2	2.82818	0	3.62751	0	2.91475	0.00124	0.13158	0.99145
ROR1	-2.82705	0	0.11812	0.89944	-10.0803	0	-0.74985	0.89823
TBCD	2.82562	0	2.55592	0	-1.05767	0.26031	0.75484	0.89823
DNAJC4	2.82561	0	1.27054	0.02617	-1.13411	0.22257	0.56784	0.93738
CENTB1	2.82184	0	1.35368	0.01842	1.34984	0.13565	-0.99777	0.82573
DSP	-2.81578	0	-3.1509	0	-4.09386	0	-0.82066	0.88443
FARSA	2.8123	0	2.17929	0.00047	1.09813	0.23856	-0.33659	0.96777
LRRC8E	-2.81167	0	-2.99921	0	-5.34129	0	-1.00855	0.82316
ZDHHC18	2.80775	0	1.26268	0.02695	-0.44346	0.68573	0.44514	0.95581
GPR162	2.80511	0	2.38736	0.00018	0.8664	0.37487	-1.08686	0.79321
TMEM132A	-2.80386	0	-3.65943	0	-6.32247	0	-1.19309	0.74691
AOC3	-2.8034	0	-2.27477	0.00032	-3.29291	0.00036	-1.72684	0.51621
TMEM119	-2.80059	0	-3.10197	0	-6.33952	0	-2.19499	0.31709
SPOCD1	-2.80013	0	-2.84127	0	-3.76492	0	0.6363	0.92182
PAX1	-2.80001	0	-2.84163	0	-3.40996	0.00036	-2.20261	0.31409
FAM63B	-2.79941	0	-2.05315	0.00068	-7.21565	0	-0.71307	0.90297
SEMA6C	2.79921	0	2.45198	0.00018	1.01892	0.28081	-0.02027	0.9992
ALX4	2.79665	0	3.79114	0	9.53876	0	-0.28366	0.97696
DDIT4	2.79634	0	1.44514	0.0128	2.50845	0.00463	-0.76917	0.8941
IRAK1	-2.79407	0	-2.49989	0.00018	-4.48737	0	-0.58902	0.93296
LTBP2	-2.79253	0	-1.10994	0.04829	-3.71451	0	-1.022	0.81464
PPP4R1	-2.79182	0	-2.30828	0.00032	-7.01906	0	-0.82176	0.88408
POLD4	2.79114	0	3.02071	0	-2.00385	0.02262	0.03592	0.9992
ELN	-2.79071	0	-1.8724	0.0016	-9.00665	0	-1.34216	0.68441
LASS4	2.79057	0	2.25293	0.00032	-0.5627	0.59471	-0.05066	0.99804
NID1	-2.78766	0	-1.91351	0.00141	-9.5625	0	-4.51733	0
EHMT2	2.78665	0	1.6644	0.0053	1.06804	0.25441	0.46655	0.95208
LOXL1	-2.78366	0	-3.63474	0	-12.8113	0	-3.21242	0.06604
MEOX2	-2.78308	0	-2.69858	0	-3.14326	0.00067	-0.8956	0.85849
SLC4A3	-2.78218	0	-2.22995	0.00032	-0.69402	0.49328	-1.53036	0.59615
CALM3	2.78179	0	1.40624	0.01515	-0.4884	0.65083	-0.62201	0.925
VSNL1	-2.78071	0	-1.47884	0.0113	-7.70473	0	-2.26593	0.28593
XYLT1	-2.7789	0	0.22317	0.77899	-6.21431	0	-1.69551	0.53382
DVL2	2.77546	0	3.16485	0	3.29004	0.00036	-0.25768	0.98118
METRNL	-2.77501	0	-2.36589	0.00018	-10.0917	0	-0.5842	0.93516
ELOF1	2.77162	0	2.2038	0.00032	1.1856	0.19908	0.22573	0.9852
SYNJ2	-2.77023	0	-2.27318	0.00032	-7.5377	0	-2.21398	0.30992
CGREF1	-2.7688	0	-3.05912	0	-3.11863	0.00067	-0.78921	0.89316
AP2A1	2.76177	0	3.25555	0	-2.27166	0.00984	1.24919	0.72186
CA12	-2.76021	0	-3.10811	0	-2.90508	0.00124	-0.13696	0.99145
CDKN1C	-2.7578	0	-3.00949	0	-4.16339	0	-0.43333	0.95689
DLGAP4	-2.7578	0	-0.3597	0.57549	-4.50229	0	-0.80868	0.88632
EDNRA	-2.75731	0	-1.28718	0.02439	-3.98383	0	-4.07712	0.01075
MICAL2	-2.75705	0	-1.58343	0.00697	-7.342	0	-1.91357	0.43566
FOSL2	-2.75701	0	-2.84319	0	-8.26983	0	-1.09798	0.78832
BICD1	-2.75062	0	-0.17363	0.84445	-6.24216	0	-1.26583	0.71511
KCNMA1	-2.7497	0	0.62814	0.29539	-5.50937	0	0.30413	0.97264
ZNF703	2.74919	0	5.16147	0	1.80062	0.03979	1.62344	0.56024
NOPE	-2.74894	0	-3.24673	0	-12.1887	0	-4.95031	0
USP31	-2.74887	0	-2.67439	0	-4.70212	0	-0.39788	0.96082
SLC44A2	2.74644	0	2.04864	0.00074	-1.37291	0.12714	-0.54211	0.93969
SHB	-2.74468	0	-3.47954	0	-7.65514	0	-1.3692	0.67137
CDR2	-2.7442	0	-2.82659	0	-1.50449	0.09049	-1.88172	0.44739
KLHDC3	2.7416	0	1.58371	0.00697	2.48319	0.00489	0.65732	0.91803
ACOT9	-2.74088	0	-2.34773	0.00026	-4.91708	0	-1.05482	0.80159
PDGFA	-2.74042	0	-3.05764	0	-5.52395	0	-3.24362	0.06
GPR173	-2.73973	0	-2.66845	0	-2.659	0.00296	-0.88727	0.86185
ADAM19	-2.73963	0	-0.52172	0.37978	-9.16444	0	-1.07033	0.79744
C1orf92	2.7395	0	3.04593	0	4.61652	0	2.49211	0.21158
FAM38A	-2.73856	0	-2.71497	0	-6.47904	0	-1.92696	0.4287
NAGLU	2.73711	0	1.00724	0.07416	-5.58358	0	0.27526	0.97912
LSM7	2.73458	0	0.96912	0.08705	-2.95349	0.00095	-0.85423	0.87548
CLPTM1	2.73291	0	1.61903	0.00623	-1.31053	0.14978	-0.54108	0.94016
COMP	-2.73285	0	-2.7573	0	-3.45045	0.00036	-3.24952	0.06
DKK2	-2.73282	0	-1.55788	0.00779	-3.79474	0	-1.49746	0.61275
FRMD5	-2.73144	0	0.20423	0.80498	-5.20196	0	-2.1424	0.33354
HUNK	-2.73082	0	-1.51554	0.00984	-1.13359	0.22257	0.53148	0.94226
ATAD3B	2.73017	0	1.69079	0.00463	0.72774	0.46992	-0.31969	0.96949
ADA	-2.72948	0	-2.34234	0.00026	-2.56308	0.00375	0.1266	0.99145
KIAA1755	-2.72675	0	-2.4441	0.00018	-1.15664	0.21321	-0.7638	0.89578
DRG2	2.72528	0	2.37023	0.00018	0.27115	0.81416	0.439	0.95581
MGC16121	-2.72169	0	-2.73167	0	-4.47484	0	-2.21168	0.31181
SLC24A2	-2.72139	0	-0.03939	0.96858	-4.73361	0	-0.77562	0.8941
PCTK1	2.72094	0	2.95106	0	-2.02757	0.02049	-0.48134	0.94953
CALB2	-2.72091	0	-2.49019	0.00018	-4.53899	0	-1.19386	0.74691
TLN1	2.72083	0	1.67128	0.00505	-4.03089	0	0.02067	0.9992
ALDH18A1	-2.71941	0	-1.78123	0.00263	-3.98873	0	-2.52785	0.19958
TCEB1	-2.71938	0	-2.7501	0	-0.44192	0.68683	1.08249	0.79321
FSCN1	-2.71777	0	-3.65174	0	-11.0717	0	-2.58733	0.18693
KCTD10	-2.71668	0	-2.97726	0	-5.28161	0	-3.88167	0.01869
PNMA6A	-2.71655	0	-3.39541	0	-6.06171	0	-1.35939	0.67345
MFAP2	-2.71544	0	-2.82162	0	-9.73903	0	-2.9379	0.10915
SCUBE2	-2.71371	0	-3.25811	0	-3.20607	0.00036	-0.35757	0.96275
PPP1R13L	-2.71275	0	-2.02714	0.00074	-6.04933	0	-2.67068	0.16456
EFNA5	-2.71238	0	-0.39048	0.52971	-6.86306	0	-1.2579	0.71735
APCDD1L	-2.71121	0	-3.37675	0	-9.659	0	-0.44556	0.95581
GLIS3	-2.70834	0	0.1339	0.88396	-4.91722	0	-2.32422	0.26825
C10orf59	2.70826	0	0.41294	0.49311	2.42746	0.00584	-1.2022	0.74691
FKBP14	-2.70787	0	-2.8771	0	-4.52838	0	0.09607	0.99537
FLOT2	2.7073	0	3.10335	0	2.01212	0.02208	0.61269	0.92637
FAM129A	-2.7071	0	-0.41825	0.489	-6.5263	0	-1.38746	0.66418
CPZ	2.70443	0	4.46511	0	0.66184	0.51916	0.85879	0.87323
GPR1	-2.70419	0	-2.13302	0.00047	-2.42856	0.00584	-0.35919	0.96274
SYNC1	-2.70399	0	-2.67209	0	-6.61908	0	-0.58898	0.93296
PLOD2	-2.70338	0	-1.23743	0.0304	-6.08409	0	-3.38488	0.04706
KBTBD11	-2.70294	0	-3.06741	0	-6.94633	0	-2.71456	0.15147
ACHE	2.70287	0	2.3478	0.00026	1.91711	0.02851	-0.18069	0.98894
CNIH2	-2.70225	0	-2.7061	0	-2.11257	0.01629	0.54883	0.93943
DPYSL3	-2.70068	0	-0.73938	0.20934	-6.45358	0	-2.91049	0.11632
HDAC5	2.69951	0	3.4311	0	2.11874	0.01612	1.41841	0.65272
JDP2	2.69942	0	2.61616	0	-2.73637	0.00225	0.01052	0.9992
DNAJB5	-2.69912	0	-3.03589	0	-2.97071	0.00095	-0.34892	0.96475
PAPSS2	-2.69907	0	-1.10186	0.04954	-7.19474	0	-2.58308	0.18707
WNT5B	-2.69826	0	-2.36944	0.00018	-3.2755	0.00036	-1.28955	0.70847
AARSD1	2.69806	0	1.20992	0.03353	-0.20302	0.86218	-0.62612	0.92469
TGFBRAP1	-2.69787	0	-2.93643	0	-5.04159	0	-0.28392	0.97675
ARHGEF1	2.69688	0	0.71182	0.22879	-2.01694	0.02137	1.27935	0.71311
HS3ST3A1	-2.69681	0	-2.69148	0	-6.38629	0	-1.39836	0.65977
LRRC59	-2.69591	0	-2.50372	0.00018	-6.78404	0	-2.13559	0.33495
CCNYL1	-2.6959	0	-2.89774	0	-4.32282	0	-0.54216	0.93969
SLC6A6	-2.69575	0	-2.67058	0	-3.57384	0	-2.02513	0.39282
TNFRSF19	-2.69386	0	-2.02143	0.00088	-4.65583	0	-4.583	0
ZNHIT4	2.68815	0	5.701	0	2.54825	0.00397	-0.92359	0.85039
CADM3	-2.68719	0	-3.22868	0	-4.31769	0	-0.67139	0.91394
RPS24	2.68421	0	2.20375	0.00032	0.85054	0.384	-0.10064	0.99537
PXMP2	-2.68317	0	-2.67748	0	-4.39051	0	-2.55776	0.19365
DUOX1	-2.68306	0	-2.91294	0	-7.42164	0	0.00527	0.9992
COX7A1	2.68249	0	0.71408	0.22783	-0.8778	0.36718	-0.32161	0.96949
NEK8	2.68108	0.00025	1.2328	0.03125	0.92341	0.33826	-0.69253	0.90725
PLCD3	-2.67617	0.00025	-3.07521	0	-3.2213	0.00036	-0.56495	0.93738
COL16A1	2.67557	0.00025	1.7828	0.00263	-0.93314	0.33243	-1.14241	0.76641
FAM19A5	-2.67471	0.00025	-1.76978	0.00295	-1.95153	0.02563	-2.08442	0.35519
TWIST1	-2.67404	0.00025	-3.13005	0	-8.33639	0	-4.86256	0
FGFR3	-2.67403	0.00025	-3.07705	0	-1.32074	0.14601	-0.28079	0.97729
SLC29A4	-2.67393	0.00025	-3.1953	0	-4.65998	0	-1.93978	0.42772
BCL7A	-2.67376	0.00025	-1.0286	0.06767	-2.95969	0.00095	-0.25086	0.98171
LHFPL2	-2.67229	0.00025	-0.36188	0.57169	-5.81373	0	-2.4094	0.23462
PTPRF	-2.67199	0.00025	-2.78676	0	-2.88726	0.00149	-0.13839	0.99145
NEGR1	2.67162	0.00025	2.54244	0	4.75664	0	3.02817	0.09195
C9orf119	2.66969	0.00025	0.35566	0.58078	-2.65169	0.00296	0.48031	0.94953
ELK3	-2.66888	0.00025	-1.15207	0.04071	-4.23665	0	-0.8085	0.88632
SYT11	-2.66801	0.00025	-3.03208	0	-3.29478	0.00036	-1.88516	0.44678
GRB10	-2.66579	0.00025	-0.63432	0.29044	-4.72636	0	-0.87447	0.86721
CENPT	2.66573	0.00025	2.00914	0.00088	-1.14934	0.21656	-0.81993	0.88458
PPFIA2	-2.66496	0.00025	0.15635	0.86146	-3.17575	0.00067	0.62399	0.925
ILK	2.6639	0.00025	2.06291	0.00061	-6.68245	0	0.24174	0.98334
B4GALNT1	2.66292	0.00025	2.1585	0.00047	2.24789	0.01062	0.63416	0.92182
EPDR1	-2.66101	0.00025	-3.21485	0	-2.63431	0.00307	-0.56039	0.93738
ATN1	2.6606	0.00025	3.06659	0	2.7786	0.002	0.94805	0.84552
PHACTR3	-2.65953	0.00025	-1.05633	0.06021	-3.91485	0	0.4229	0.95836
CSRP2	-2.65883	0.00025	-3.04745	0	-6.14036	0	-4.44001	0
CPNE2	-2.65838	0.00025	-3.14144	0	-4.33826	0	-2.12138	0.34107
ALPL	-2.65756	0.00025	-3.5754	0	-4.98831	0	-1.40448	0.65749
TES	-2.65736	0.00025	-2.9187	0	-6.36625	0	0.10656	0.9946
LMCD1	-2.65696	0.00025	-2.12264	0.00047	-3.54994	0	0.67264	0.91394
PTHLH	-2.65659	0.00025	-2.89212	0	-2.54513	0.00409	-0.33149	0.96777
TNFRSF14	2.65534	0.00025	2.25903	0.00032	1.79979	0.03984	-1.20503	0.74553
CAMK2A	-2.65421	0.00025	-3.12506	0	-4.10156	0	-1.76073	0.49855
RHOBTB3	-2.65368	0.00025	-2.96796	0	-3.19658	0.00036	-2.06114	0.37416
HOXD4	-2.65343	0.00025	-2.49231	0.00018	-5.60037	0	0.38655	0.96082
EMID2	-2.65319	0.00025	-2.30115	0.00032	-1.41651	0.11409	-0.12717	0.99145
AMACR	-2.65059	0.00025	-2.61024	0	-1.17653	0.20417	0.769	0.8941
RALA	-2.64965	0.00025	-1.08147	0.0541	-4.42335	0	-4.43035	0
GTPBP2	-2.64867	0.00025	-2.82488	0	-2.41703	0.00615	-1.34779	0.68078
MEIS3	-2.64649	0.00025	-2.84836	0	-2.52964	0.00451	-0.88896	0.86185
SHROOM1	2.64645	0.00025	2.94893	0	1.50656	0.08991	-1.5422	0.5906
PRDM4	-2.64608	0.00025	-2.6242	0	-3.81327	0	0.41752	0.95869
PDZRN4	-2.64586	0.00025	-0.96849	0.08728	-3.43472	0.00036	-2.58326	0.18707
TMEM132B	-2.64554	0.00025	-0.92813	0.10397	-4.47818	0	-1.6203	0.5608
PTGDS	2.64538	0.00025	2.12796	0.00047	3.4636	0.00036	0.65883	0.91803
PLXNA2	-2.64517	0.00025	-0.41606	0.49078	-5.79481	0	-1.63687	0.55532
KIAA1199	-2.64454	0.00025	-1.62819	0.00586	-6.25082	0	-4.29509	0.01075
RAB15	-2.64413	0.00025	-2.78129	0	-3.85721	0	-2.40763	0.23462
C6orf65	-2.64402	0.00025	-1.30206	0.02303	-8.3792	0	-0.55369	0.93767
TIMELESS	-2.64317	0.00025	-2.97494	0	-2.16352	0.0138	0.32128	0.96949
GLIS1	-2.64297	0.00025	-1.03483	0.06543	-6.11144	0	-0.30595	0.97243
ANKRD1	-2.64234	0.00025	-2.82818	0	-0.68902	0.49672	0.45721	0.95452
ABCF3	2.64104	0.00025	2.64397	0	2.599	0.00341	1.11982	0.77882
FIBCD1	-2.64071	0.00025	-2.93952	0	-1.65543	0.05879	-0.68136	0.91235
PGPEP1	2.64041	0.00025	2.40482	0.00018	0.67828	0.50524	-1.14906	0.76545
ABHD12	2.63979	0.00025	2.19354	0.0004	0.16997	0.88688	-0.36906	0.96224
FAM13C1	-2.63868	0.00025	-2.38776	0.00018	-0.82305	0.4024	1.4404	0.64385
TUBB6	-2.63674	0.00025	-2.95538	0	-5.59294	0	-2.18953	0.31926
SRPK3	-2.63661	0.00025	-2.96183	0	-3.06839	0.00067	-2.15945	0.32872
FREQ	-2.6366	0.00025	-2.74867	0	-5.99633	0	-1.538	0.59417
GALNAC4S-6ST	-2.63617	0.00025	-1.97394	0.00101	-7.2252	0	-1.57932	0.57903
HEY2	-2.63562	0.00025	-3.35997	0	-3.92652	0	-5.40889	0
SERPINE2	-2.63549	0.00025	-3.21969	0	-5.49734	0	-2.4213	0.23333
EMILIN2	2.63478	0.00025	0.13459	0.88279	0.55489	0.59986	-0.33922	0.96708
EN1	-2.63439	0.00025	-2.39049	0.00018	-6.34514	0	-2.19765	0.31434
MTA2	-2.63417	0.00025	-2.17179	0.00047	-0.70545	0.48606	-0.63681	0.92182
TYRO3	-2.6339	0.00025	-3.00673	0	-6.26633	0	0.7969	0.89079
C5orf13	-2.63291	0.00025	-2.05053	0.00074	-8.7286	0	-4.5106	0
SLC2A5	-2.63161	0.00025	-2.99137	0	-6.90327	0	0.32849	0.96815
MYBPC1	-2.63033	0.00025	-1.80503	0.00245	-1.99871	0.02269	-0.73751	0.89823
C14orf132	-2.62988	0.00025	-3.24533	0	-6.46408	0	-3.4577	0.04321
CCDC23	-2.62605	0.00025	-3.00736	0	-4.77025	0	-1.07153	0.79722
ECE1	-2.62553	0.00025	-2.30239	0.00032	-4.54423	0	-1.13446	0.76686
ADAMTS9	-2.62263	0.00025	-0.58534	0.32668	-5.04574	0	-2.40445	0.23462
KIAA1949	-2.62219	0.00025	-2.8588	0	-3.62005	0	-2.1403	0.33455
BOLA3	-2.622	0.00025	-2.81322	0	0.51535	0.62953	-0.32545	0.96939
MAP2K7	2.62158	0.00025	2.05505	0.00068	0.74047	0.46117	0.47345	0.95151
ARHGAP24	-2.6214	0.00025	0.30855	0.65108	-2.61374	0.00318	-0.55795	0.93738
MEOX1	-2.62005	0.00025	-2.90252	0	-2.12487	0.01587	0.10112	0.99537
KIAA1539	-2.6194	0.00025	-2.64255	0	-8.73657	0	0.77427	0.8941
MYOD1	-2.61854	0.00025	-2.82521	0	-1.57052	0.0756	0.3304	0.96777
FN1	-2.61822	0.00025	-0.69243	0.24396	-5.55052	0	-3.94563	0.01869
PES1	2.61773	0.00025	1.59197	0.00686	0.87938	0.36676	0.7121	0.90297
KLF7	-2.6177	0.00025	-1.83722	0.002	-7.9802	0	-2.4346	0.2297
ENPP1	-2.6176	0.00025	-2.55488	0	-5.82369	0	-0.25576	0.98171
FIZ1	2.61692	0.00025	2.33101	0.00026	0.57473	0.58521	-0.53928	0.94016
CSRP3	-2.61688	0.00025	-2.9897	0	-2.03696	0.01967	-0.88798	0.86185
SCN8A	-2.61579	0.00025	-1.182	0.03709	-5.42858	0	-1.68588	0.53625
OAS2	-2.61571	0.00025	-2.75707	0	-4.88384	0	-1.05241	0.80288
DKK3	-2.61522	0.00025	-3.64116	0	-5.24159	0	-0.27128	0.98048
MRPL54	2.61409	0.00025	1.13178	0.04434	-0.8353	0.39415	-0.07138	0.99626
CD9	-2.61232	0.00025	-2.97143	0	-5.66923	0	-1.04393	0.80493
HRH1	-2.61187	0.00025	-2.69639	0	-2.83299	0.00149	-0.59635	0.93179
PLEKHN1	-2.61157	0.00025	-2.72474	0	-1.15522	0.21398	-1.14939	0.76545
FAM129B	-2.61152	0.00025	-2.87556	0	-8.64252	0	-1.94666	0.42239
ARPC5	-2.61096	0.00025	-2.51668	0	-3.57182	0	-2.83611	0.12037
PGM2L1	-2.60739	0.00025	-2.75276	0	-6.42334	0	-0.36298	0.96262
TCP11L1	-2.60665	0.00025	-2.39019	0.00018	-3.86354	0	-0.55238	0.9384
DDEF2	-2.60593	0.00025	-0.41519	0.49137	-2.28846	0.00952	-1.46345	0.62837
NEFM	-2.60584	0.00025	-2.88332	0	-0.46723	0.66755	-0.51187	0.94346
DYRK1B	2.60543	0.00025	1.55431	0.00784	1.00892	0.28633	1.8597	0.45398
TBC1D2	-2.60527	0.00025	-2.67583	0	-7.58257	0	-0.55989	0.93738
PTGES2	2.60471	0.00025	1.37325	0.01743	2.55686	0.00385	0.63425	0.92182
PRRG3	-2.60468	0.00025	-2.74367	0	-3.6316	0	-0.0993	0.99537
DMN	-2.6045	0.00025	-3.11406	0	-2.30432	0.00881	-0.76493	0.89578
SMPX	-2.60434	0.00025	-3.01874	0	-2.0668	0.01811	-0.29186	0.97615
MYOZ1	-2.60427	0.00025	-3.08811	0	-1.16364	0.20935	-2	0.40184
NPTX2	-2.60398	0.00025	-3.13837	0	-5.6931	0	-5.04222	0
TUBB2B	-2.60382	0.00025	-3.33335	0	-3.48684	0	-1.65752	0.54793
PLD2	2.60266	0.00025	1.74419	0.00346	-0.32122	0.77822	0.54849	0.93943
ZNF536	-2.60255	0.00025	-1.10426	0.04904	-4.75315	0	-1.4415	0.64385
TSPAN13	-2.60244	0.00025	-3.51799	0	-6.50526	0	-4.01585	0.01075
SND1	2.6007	0.00025	3.46716	0	-0.01784	0.99001	0.10789	0.9946
SCG2	-2.6003	0.00025	-2.72484	0	-3.33608	0.00036	2.27187	0.28125
KIF13A	-2.60011	0.00025	0.43806	0.45773	-6.5302	0	0.44942	0.95581
SLC38A3	-2.59968	0.00025	-3.22309	0	-2.99986	0.00095	-0.83324	0.88099
TPST1	-2.59954	0.00025	-0.53325	0.37076	-6.41091	0	-2.60215	0.18203
SOX11	-2.59906	0.00025	-3.01057	0	-6.12734	0	-0.74135	0.89823
DUSP4	-2.59882	0.00025	-3.05252	0	-3.89495	0	-0.4395	0.95581
ENTPD6	2.59864	0.00025	1.98078	0.00101	-0.5576	0.59824	0.74902	0.89823
CMYA1	-2.59849	0.00025	-2.83025	0	-1.80012	0.03984	-0.20271	0.98827
GJA1	-2.59767	0.00025	-3.84298	0	-10.1286	0	-8.99831	0
MCART1	-2.59725	0.00025	-2.77299	0	-2.09125	0.0172	-0.38146	0.96082
PTGER3	-2.59678	0.00025	-0.49886	0.39782	-2.93893	0.00095	-3.84886	0.01869
DUSP26	-2.59663	0.00025	-2.98368	0	-0.30029	0.79329	-1.14582	0.76557
IMMT	-2.59618	0.00025	-2.18362	0.00047	-1.84378	0.03542	-1.66218	0.54543
EIF2C4	-2.59554	0.00025	-1.49071	0.01075	-3.71554	0	0.87436	0.86721
NT5DC2	-2.5945	0.00025	-3.3475	0	-5.44282	0	-2.61739	0.17857
LAYN	-2.59404	0.00025	-2.68578	0	-3.76198	0	-1.3919	0.66136
ACAN	-2.59403	0.00025	-2.91869	0	-6.03193	0	-0.3779	0.96202
STK17A	-2.5939	0.00025	-2.75563	0	-3.32006	0.00036	-0.32783	0.96815
PTGIR	-2.59189	0.00025	-0.92761	0.10411	-0.64369	0.53293	-0.39426	0.96082
GAMT	2.59189	0.00025	1.28819	0.02429	1.60725	0.06677	0.40533	0.96082
GPRIN1	-2.59181	0.00025	-3.187	0	-4.4587	0	1.28439	0.70847
IRX5	-2.59152	0.00025	-2.95594	0	-9.56787	0	-1.5227	0.60056
CHRNG	-2.59082	0.00025	-2.72946	0	-1.50625	0.09011	0.61277	0.92619
DIO2	-2.59	0.00025	-3.32156	0	-4.25116	0	-0.82813	0.88376
ALDH1A3	-2.58998	0.00025	-3.16018	0	-3.9396	0	-1.57663	0.58002
ITGB1BP3	-2.58876	0.00025	-2.77207	0	-0.61993	0.55193	-0.82544	0.88408
KIFC3	-2.58868	0.00025	-2.17876	0.00047	-5.09335	0	0.11005	0.99459
PVALB	-2.58851	0.00025	-2.73257	0	-2.39355	0.00653	-0.49031	0.94856
PDCL3	-2.58849	0.00025	-2.70806	0	-0.46691	0.66773	0.77889	0.8941
C1orf115	-2.58717	0.00025	-2.80661	0	-1.49423	0.09314	-1.31173	0.69846
ANXA6	2.58704	0.00025	1.74033	0.00352	-2.87464	0.00149	-1.43195	0.64702
ST6GAL2	-2.58615	0.00025	-3.17497	0	-4.56564	0	-1.32647	0.69179
C14orf151	-2.58585	0.00025	-2.77867	0	-5.64193	0	-1.79961	0.48742
NFIB	2.58572	0.00025	3.36149	0	7.43964	0	2.29115	0.27991
MVD	2.58428	0.00025	1.38114	0.01694	-1.13803	0.22086	-0.77584	0.8941
TXLNB	-2.58408	0.00025	-1.74696	0.00333	-1.40251	0.11824	-1.51354	0.60541
IPO8	-2.58379	0.00025	-2.91125	0	-0.96373	0.31235	-1.04223	0.8051
RAC3	-2.58374	0.00025	-2.96192	0	-7.10519	0	-0.8481	0.87692
RASAL2	-2.58295	0.00025	0.7424	0.20782	-4.87772	0	0.34552	0.96525
PELP1	2.58295	0.00025	1.41677	0.01433	1.7638	0.04305	-0.02861	0.9992
YWHAB	2.58216	0.00025	3.62133	0	-0.1826	0.87729	-0.36749	0.96224
SRRM2	2.58215	0.00025	2.21584	0.00032	1.60031	0.0684	0.70839	0.90364
GPX3	2.5821	0.00025	2.60563	0	1.17292	0.20602	0.28174	0.97723
COL25A1	-2.58146	0.00025	0.19677	0.81612	-3.9431	0	-0.11232	0.99449
IGF2BP2	-2.57976	0.00025	-0.9581	0.09139	-6.68062	0	-0.72975	0.90122
GPR161	-2.57856	0.00025	-2.79499	0	-6.13663	0	-2.03219	0.38967
ST8SIA1	-2.57813	0.00025	-1.31214	0.0219	-5.85035	0	-1.35947	0.67345
RPL3L	-2.57756	0.00025	-2.90492	0	-1.60726	0.06677	-0.79252	0.89165
LMOD2	-2.57734	0.00025	-3.09008	0	-2.72127	0.00264	-0.33059	0.96777
MMP11	-2.57701	0.00025	-4.07879	0	-6.07214	0	-4.18399	0.01075
FZD6	-2.57642	0.00025	-2.64906	0	-5.50263	0	-2.48286	0.21513
ALS2CR4	-2.57637	0.00025	-2.95662	0	-2.69737	0.00273	-1.79788	0.48742
FNDC1	-2.57597	0.00025	-2.47463	0.00018	-1.7311	0.04699	-3.17555	0.06881
BUD13	-2.57596	0.00025	-2.70718	0	-0.88035	0.36575	-0.65253	0.91923
PERP	-2.57553	0.00025	-3.07416	0	-10.8883	0	-3.63114	0.02985
CDK3	2.57447	0.00025	1.50008	0.01041	0.40644	0.71532	-0.64744	0.92066
GTSE1	-2.57434	0.00025	-2.99069	0	-2.01424	0.02181	0.84213	0.87863
BCAT1	-2.57328	0.00025	-1.12279	0.04619	-6.34598	0	-1.98994	0.40698
ARSE	-2.57313	0.00025	-3.15758	0	-5.47312	0	-0.1917	0.98894
RECQL5	2.57277	0.00025	2.50434	0.00018	3.42306	0.00036	0.73837	0.89823
ARHGEF10L	-2.57274	0.00025	-2.55857	0	-7.04939	0	0.28103	0.97723
SAA4	-2.57247	0.00025	-2.87088	0	-0.54767	0.60591	0.13156	0.99145
C12orf10	2.57224	0.00025	1.24922	0.02871	0.97661	0.3051	-0.54053	0.94016
SCN2B	-2.57222	0.00025	-2.88052	0	-2.61541	0.00318	-0.59638	0.93179
DGKQ	2.5722	0.00025	1.62859	0.00586	0.8996	0.35368	-1.18704	0.74771
LMOD3	-2.57213	0.00025	-3.04487	0	-1.39308	0.12089	-1.22687	0.7326
MYLK2	-2.57203	0.00025	-2.95764	0	0.09151	0.94342	1.06299	0.80159
FGFR2	-2.57161	0.00025	-0.89139	0.12131	-1.36951	0.12844	-0.89003	0.86069
ARHGAP28	-2.57116	0.00025	-1.29641	0.02338	-9.63655	0	-3.01793	0.09351
PCBP3	-2.57087	0.00025	-2.36857	0.00018	-0.94353	0.32589	0.83075	0.8818
UCK2	-2.57071	0.00025	-2.00105	0.00088	-4.50736	0	-1.25779	0.71735
STXBP2	2.57035	0.00025	2.3942	0.00018	4.99766	0	0.42463	0.95836
KIAA0040	-2.56972	0.00025	-2.66353	0	-2.72104	0.00264	0.68269	0.91171
LY6H	-2.56971	0.00025	-2.13921	0.00047	-2.80044	0.002	-0.33819	0.96708
DUSP13	-2.56915	0.00025	-2.96463	0	-1.98887	0.0229	0.53684	0.94108
ARHGAP22	-2.56909	0.00025	-0.89485	0.11937	-5.20335	0	-1.5398	0.59276
GFRA3	-2.56905	0.00025	-2.86201	0	-3.01542	0.00095	-2.82374	0.12385
CHDH	-2.56898	0.00025	-2.88157	0	-3.9163	0	-1.14224	0.76641
SLC31A1	-2.56806	0.00025	-1.75819	0.0032	-5.3765	0	-1.08349	0.79321
CXCL12	-2.56745	0.00025	-2.87508	0	-5.55937	0	-0.49815	0.94675
LDOC1L	-2.56701	0.00025	-2.66753	0	-1.83476	0.03642	-1.15702	0.76312
SDC2	-2.56692	0.00025	-1.41982	0.01405	-5.42564	0	-1.59343	0.57477
ASTN2	2.56624	0.00025	1.64381	0.00557	4.21439	0	-0.70966	0.90358
KIAA0082	2.56617	0.00025	1.10238	0.04944	3.50878	0	2.8333	0.12037
ADD2	-2.56609	0.00025	-1.97706	0.00101	-0.91793	0.34236	-0.917	0.85093
HIG2	-2.56581	0.00025	-2.62897	0	-1.77601	0.04242	-1.26769	0.71471
RNPEPL1	2.56549	0.00025	2.99704	0	-2.09007	0.01729	-0.40746	0.96082
SGCB	-2.5652	0.00025	-3.09813	0	-2.41634	0.00615	-0.09577	0.99537
NANOS3	-2.56483	0.00025	-3.06428	0	-1.68695	0.05304	0.1784	0.98894
GPR133	-2.56467	0.00025	-2.99145	0	-1.3358	0.14067	1.7189	0.51982
CHST1	-2.56446	0.00025	-2.82653	0	-6.07018	0	-1.89836	0.43734
EEF1G	-2.56436	0.00025	-2.7097	0	0.16864	0.88768	-0.75526	0.89823
SERPING1	2.56381	0.00025	3.03226	0	-0.4522	0.67938	0.55037	0.93899
UAP1L1	-2.56379	0.00025	-2.85274	0	-4.80079	0	-1.28134	0.71179
ARNT2	-2.5636	0.00025	-0.5971	0.31386	-2.16817	0.01354	-0.49132	0.94853
HTR7	-2.56347	0.00025	-2.05368	0.00068	-3.96998	0	1.55741	0.5852
CIDEA	-2.56338	0.00025	-2.88916	0	-0.62452	0.54766	-1.07772	0.79438
CACNG6	-2.56332	0.00025	-2.93492	0	0.21593	0.85429	0.11886	0.99339
DYSFIP1	-2.56331	0.00025	-2.71044	0	-1.29636	0.1545	-0.78753	0.8941
CCT7	2.56324	0.00025	0.7568	0.19664	1.99036	0.0229	-0.92878	0.84989
CRYM	-2.56309	0.00025	-2.72537	0	-3.57056	0	0.80494	0.88724
SLFN5	-2.5629	0.00025	-2.66884	0	-4.60144	0	0.04147	0.9992
STMN1	-2.56281	0.00025	-2.85738	0	-3.57247	0	-1.15472	0.76397
GYLTL1B	-2.56167	0.00025	-3.03631	0	-2.41301	0.00626	0.73139	0.90122
C16orf45	-2.56146	0.00025	0.03544	0.97204	-5.98166	0	-0.64218	0.92182
TMEM59L	-2.56137	0.00025	-3.08227	0	-2.55166	0.00385	0.08754	0.99595
IMPA2	-2.56129	0.00025	-2.90581	0	-5.76564	0	-0.72415	0.90212
TNFRSF9	-2.56105	0.00025	-3.05557	0	-7.0132	0	-2.94718	0.10893
ACSL1	-2.56097	0.00025	-2.94751	0	-3.98879	0	-1.55794	0.5852
SYNPO2L	-2.56072	0.00025	-2.75422	0	-0.85919	0.3796	-0.68108	0.91235
TUBB3	2.56054	0.00025	2.9024	0	-10.0047	0	-1.55869	0.5852
SEC24C	2.56032	0.00025	1.50705	0.01012	-0.63943	0.53677	0.10226	0.99537
EGFL6	-2.56031	0.00025	-3.063	0	-4.51369	0	-1.80584	0.48497
ABI3BP	-2.56026	0.00025	0.00353	0.9976	-2.8412	0.00149	-0.1679	0.99014
ADAMTS15	-2.56002	0.00025	-2.92696	0	-1.78083	0.04199	0.14511	0.99145
ABCC4	-2.55983	0.00025	-0.69496	0.24211	-3.21634	0.00036	0.3283	0.96815
RPL13	2.55971	0.00025	1.74899	0.00327	-0.33089	0.77132	0.18224	0.98894
SPSB4	-2.55953	0.00025	-3.1046	0	-3.74731	0	-0.43045	0.9583
TNFRSF21	-2.55918	0.00025	-1.99247	0.00088	-3.02209	0.00095	-0.81103	0.88632
KBTBD5	-2.55889	0.00025	-2.78325	0	-1.24042	0.17585	0.17341	0.98965
ADM2	-2.55864	0.00025	-2.93065	0	-0.84094	0.3904	-1.32826	0.69032
KBTBD10	-2.55861	0.00025	-2.7589	0	0.57559	0.58486	0.56442	0.93738
NTF3	-2.55828	0.00025	-3.14005	0	-4.29733	0	-1.17718	0.75375
ABHD8	2.55801	0.00025	2.29429	0.00032	1.59294	0.07015	-0.77291	0.8941
CXCR7	-2.55793	0.00025	-2.69187	0	-8.97624	0	-1.76605	0.49672
ITGA2	-2.55788	0.00025	-2.07773	0.00061	0.1205	0.92323	-1.05319	0.80233
DPP4	-2.55762	0.00025	-2.74537	0	-7.13325	0	-2.82955	0.12385
ARHGDIG	-2.55738	0.00025	-2.8087	0	-5.63358	0	-2.77715	0.13584
RGS11	-2.55647	0.00025	-2.7375	0	-3.07545	0.00067	2.19929	0.31409
ARHGAP20	-2.55601	0.00025	-1.29814	0.02317	-1.50269	0.09148	-2.37558	0.24327
FAM101A	-2.55562	0.00025	-3.04961	0	-2.23286	0.01119	-0.56038	0.93738
TSC22D4	2.55531	0.00025	2.73919	0	5.36602	0	0.34977	0.9647
PADI2	-2.55526	0.00025	-3.04626	0	-1.30942	0.1502	-1.0039	0.82453
ENTPD4	-2.55509	0.00025	-1.20334	0.03427	-3.85074	0	-2.72692	0.1485
FLJ11151	-2.55378	0.00025	-1.83775	0.002	-3.92553	0	0.72455	0.90212
PRND	-2.55331	0.00025	-2.75035	0	-3.06656	0.00067	-0.97296	0.83452
MPZ	-2.55315	0.00025	-2.48076	0.00018	0.72943	0.46833	-0.89618	0.85849
ENTPD3	-2.55313	0.00025	-3.04215	0	-3.47249	0	0.35116	0.96454
LOC440508	-2.55297	0.00025	-2.75516	0	-2.87814	0.00149	-0.73686	0.89823
ARPP-21	-2.55261	0.00025	-0.82282	0.16214	-1.23633	0.17808	-0.9015	0.85849
C9orf58	-2.55169	0.00025	-2.61567	0	-0.74217	0.46054	-0.63245	0.92182
CDH15	-2.5515	0.00025	-2.90661	0	-4.3086	0	-0.32683	0.96821
LAMB3	-2.55128	0.00025	-2.87742	0	-0.64083	0.53619	-0.48633	0.94902
LOC347273	-2.5511	0.00025	-2.83789	0	-3.88743	0	-1.47086	0.62435
VASH2	-2.55107	0.00025	-3.03483	0	-11.8143	0	-1.66088	0.54565
DPEP1	-2.55089	0.00025	-2.87489	0	-0.52378	0.62398	0.39495	0.96082
PTPRK	-2.54942	0.00025	0.29371	0.67497	-4.71707	0	-0.54391	0.93969
ACTN3	-2.54911	0.00025	-2.78352	0	-1.8687	0.03298	-0.10092	0.99537
LOC387856	-2.54872	0.00025	-2.69346	0	-1.01205	0.28434	0.56223	0.93738
CD58	-2.54869	0.00025	-2.24436	0.00032	-3.19729	0.00036	0.58445	0.93514
CACNA1S	-2.54865	0.00025	-3.10857	0	-1.75718	0.04402	0.23666	0.9848
ST6GALNAC2	-2.54793	0.00025	-2.91684	0	-2.53172	0.00431	0.29109	0.97633
FABP3	-2.54767	0.00025	-2.84172	0	-2.52722	0.00451	-0.24308	0.98313
C1orf159	2.54763	0.00025	1.93549	0.00128	-0.11381	0.92822	-0.35777	0.96275
TNIK	-2.54746	0.00025	0.06181	0.94883	-6.43715	0	-1.12248	0.77688
WNT9B	-2.54736	0.00025	-2.76416	0	-0.50485	0.6367	-0.30983	0.97192
CASQ1	-2.54685	0.00025	-2.86358	0	-1.01105	0.28466	-0.91557	0.85162
NDUFV3	2.54652	0.00025	1.00633	0.07449	1.50029	0.092	-0.48884	0.94902
HSPB8	-2.54644	0.00025	-3.03427	0	-2.65197	0.00296	-0.37208	0.96224
PUNC	-2.54618	0.00025	-3.34259	0	-2.1498	0.0145	0.2249	0.9852
MYLC2PL	-2.54612	0.00025	-2.91986	0	-2.68034	0.00273	-1.61099	0.56661
FHL2	-2.54539	0.00025	-1.4258	0.01371	-6.10684	0	-0.6522	0.91923
DUOX2	-2.54539	0.00025	-3.02314	0	-5.81154	0	-2.13263	0.33575
SYT6	-2.54496	0.00025	-3.03417	0	-5.56746	0	-0.59156	0.93206
ITPKA	-2.54493	0.00025	-2.88888	0	-2.85453	0.00149	-1.30801	0.69881
MGC45800	-2.54441	0.00025	-2.78149	0	-4.77854	0	-0.55583	0.93747
XG	-2.54428	0.00025	-2.89648	0	-2.93023	0.00124	-1.27729	0.7135
ADAMTS7	-2.54408	0.00025	-3.05689	0	-6.40822	0	-0.22305	0.9855
PEG10	-2.54322	0.00025	-3.10632	0	-4.83454	0	-1.13684	0.76671
IL17B	-2.54312	0.00025	-2.64886	0	-1.53822	0.08236	-0.06258	0.99638
SLC27A3	2.54301	0.00025	1.70537	0.0044	0.80145	0.41801	1.58091	0.5769
MN1	-2.54296	0.00025	-1.88667	0.00154	-3.92513	0	-3.32115	0.05495
SC65	-2.54246	0.00025	-3.52155	0	-8.67097	0	-1.87217	0.44761
FLJ14213	-2.54236	0.00025	-0.72348	0.2217	-3.16178	0.00067	1.1355	0.76686
CYP1B1	-2.54196	0.00025	-2.81973	0	-2.32864	0.00836	-0.099	0.99537
AFMID	-2.54123	0.00025	-2.56506	0	-0.94318	0.32622	-0.20304	0.98827
DOPEY2	-2.54116	0.00025	-1.94077	0.00128	-3.99934	0	0.04094	0.9992
PBLD	-2.54101	0.00025	-2.83147	0	-1.71144	0.04991	-0.08671	0.99604
UNQ1940	-2.54034	0.00025	-2.92618	0	-3.35201	0.00036	0.53496	0.94187
PPIB	-2.54019	0.00025	-2.7952	0	-7.02799	0	-0.8829	0.86233
NRGN	2.53992	0.00025	2.21605	0.00032	13.853	0	4.31121	0.01075
PRG2	-2.53973	0.00025	-2.83395	0	-0.97851	0.30393	0.33313	0.96777
YEATS2	-2.53955	0.00025	-0.27521	0.7061	-2.70257	0.00264	0.17758	0.98894
OSBPL3	-2.53946	0.00025	-1.79598	0.00257	-8.59082	0	-2.34017	0.26384
ITGA10	-2.53938	0.00025	-2.79614	0	-4.0132	0	-0.92806	0.85007
HHIP	-2.53907	0.00025	-2.08341	0.00061	-2.49963	0.00482	1.68154	0.53986
ZNF317	-2.53892	0.00025	-2.50723	0.00011	2.85329	0.00149	1.63565	0.55532
DHRS1	-2.5389	0.00025	-2.85553	0	-1.66552	0.05699	1.90178	0.43734
OLFML2A	-2.53879	0.00025	-3.04696	0	-4.02796	0	-1.23799	0.72593
GPC2	-2.53848	0.00025	-2.81444	0	-9.86312	0	-0.95126	0.8445
CA3	-2.53796	0.00025	-2.07189	0.00061	-1.18332	0.20046	-0.80246	0.88842
YRDC	-2.53764	0.00025	-2.68717	0	-0.74974	0.45441	-1.36799	0.67137
FBN2	-2.53746	0.00025	-0.13978	0.87689	-9.9438	0	-5.55642	0
MS4A2	-2.53739	0.00025	-2.91126	0	-3.38116	0.00036	-0.78235	0.8941
PPP1R1B	-2.53712	0.00025	-2.79888	0	0.48894	0.65045	-0.16903	0.99014
ARMCX6	-2.53663	0.00025	-2.70482	0	-1.23878	0.1766	0.75168	0.89823
ADRA2A	-2.53662	0.00025	-2.85653	0	-4.8787	0	-3.22295	0.06436
RAPSN	-2.53638	0.00025	-2.8928	0	-2.0369	0.01967	-2.01386	0.39356
CEBPG	-2.53634	0.00025	-2.85734	0	-3.30787	0.00036	0.22511	0.9852
ALDH2	-2.53631	0.00025	-2.39269	0.00018	0.85913	0.37963	2.00536	0.39825
LYSMD1	-2.53615	0.00025	-2.68851	0	3.13176	0.00067	0.53027	0.94226
KIAA0367	-2.53605	0.00025	-1.82937	0.00206	-2.35688	0.00758	0.39955	0.96082
TFF3	-2.53598	0.00025	-3.11836	0	-2.6778	0.00273	-0.81578	0.88581
IRS1	-2.53577	0.00025	-2.57702	0	-2.71327	0.00264	-2.46256	0.21881
NAT11	-2.53549	0.00025	-2.92561	0	-1.25124	0.17101	-0.56689	0.93738
ACAA2	-2.53547	0.00025	-2.87507	0	-0.58599	0.57782	-0.7022	0.90663
ATP7B	-2.53454	0.00025	-2.06529	0.00061	-1.46027	0.10145	-0.70914	0.90358
KIF23	-2.53453	0.00025	-2.92195	0	-1.7698	0.04254	0.04068	0.9992
ACTR8	-2.5345	0.00025	-2.68376	0	0.28684	0.80285	0.23894	0.98435
FLJ16008	-2.53446	0.00025	-3.49805	0	-5.20129	0	-0.51238	0.94346
COBLL1	-2.53435	0.00025	-2.4471	0.00018	-6.95831	0	-2.68974	0.15722
ADARB1	-2.53435	0.00025	-2.57345	0	-3.94282	0	0.14068	0.99145
JPH1	-2.53427	0.00025	-2.67675	0	-2.08243	0.01762	-0.20508	0.98827
KCNK6	-2.534	0.00025	-2.64629	0	-4.47682	0	0.07189	0.99626
NCAPH	-2.5337	0.00025	-2.89872	0	-2.33347	0.00818	1.42164	0.65272
SPG3A	-2.53364	0.00025	-1.09575	0.0509	-1.02401	0.27814	1.88048	0.44741
JPH2	-2.53323	0.00025	-2.91422	0	-3.51993	0	-0.23909	0.98435
MYO5A	-2.53251	0.00025	-0.00219	0.99836	-4.0173	0	0.50659	0.94448
ALG13	-2.53244	0.00025	-2.92052	0	5.64386	0	1.45033	0.6352
FGF18	-2.53238	0.00025	-2.91392	0	-5.24667	0	0.51423	0.94346
RNF214	-2.53229	0.00025	-2.20009	0.0004	0.67299	0.50956	1.1668	0.75699
TRIP13	-2.53193	0.00025	-2.94401	0	-2.55104	0.00385	-0.61427	0.92618
HMGA2	-2.53181	0.00025	-2.07681	0.00061	-7.13398	0	-2.56603	0.19085
ZSWIM4	-2.5318	0.00025	-2.31037	0.00032	-7.00642	0	-0.21459	0.9874
KCTD2	2.5313	0.00025	1.96126	0.00108	3.4101	0.00036	-0.74071	0.89823
ABLIM2	-2.5308	0.00025	-1.85186	0.0018	-3.31952	0.00036	0.21965	0.98618
LRIG1	-2.53063	0.00025	-2.88392	0	-5.2616	0	-2.23041	0.30725
PACSIN3	-2.53058	0.00025	-2.62855	0	-4.96151	0	-1.01331	0.82068
GJB2	-2.53055	0.00025	-2.79962	0	-4.50611	0	-0.32969	0.96789
GLA	-2.53022	0.00025	-3.09184	0	-1.95082	0.0257	-0.26458	0.981
WNT5A	-2.53015	0.00025	-3.10551	0	-3.296	0.00036	-3.50843	0.03896
LDHD	-2.52981	0.00025	-2.81931	0	-2.77648	0.002	-0.53541	0.94187
NR5A2	-2.52892	0.00025	-0.60661	0.30797	-2.47693	0.00489	-0.38033	0.96131
AIG1	-2.52858	0.00025	-0.0982	0.91808	-4.6241	0	-0.71379	0.90297
GNG4	-2.52827	0.00025	-2.28414	0.00032	-2.26248	0.01004	0.92093	0.85093
BAPX1	-2.52786	0.00025	-2.82639	0	-3.34786	0.00036	-1.10994	0.78234
WNT9A	-2.52713	0.00025	-3.1287	0	0.71242	0.48138	0.06998	0.99636
CHRND	-2.52706	0.00025	-2.74087	0	-2.06688	0.01811	-1.54617	0.58888
SGIP1	-2.52705	0.00025	-0.69257	0.24394	-3.50961	0	0.66647	0.91542
ZNF444	2.52666	0.00025	2.20579	0.00032	-0.9741	0.30686	-0.79776	0.89035
SH3BP4	-2.52666	0.00025	-1.575	0.00727	-2.74406	0.00213	-0.36477	0.96262
PPM1L	-2.52654	0.00025	-0.1949	0.81802	-4.59612	0	-0.56006	0.93738
ARL4A	-2.52652	0.00025	-2.78381	0	-2.65193	0.00296	0.94407	0.84594
C18orf19	-2.52598	0.00025	-2.91602	0	-1.24711	0.17285	-1.08152	0.7941
HSD17B6	-2.52582	0.00025	-2.82107	0	-2.08524	0.01753	-1.03697	0.80743
MTFR1	-2.52581	0.00025	-2.69501	0	-3.42374	0.00036	-1.57108	0.58102
GLT8D2	-2.52568	0.00025	-2.39176	0.00018	-4.67224	0	-2.70829	0.15508
C14orf118	-2.52563	0.00025	-1.99046	0.00088	2.19026	0.01262	-1.07284	0.79722
MYL4	-2.52553	0.00025	-2.98977	0	-4.2617	0	-1.73274	0.5139
GPD1	-2.52549	0.00025	-2.69739	0	-0.91033	0.34607	0.38115	0.96082
ITGB3	-2.52549	0.00025	-3.07098	0	-5.76458	0	-0.81733	0.88575
HSPA12A	-2.52549	0.00025	-1.11535	0.04729	-5.5755	0	-0.04653	0.9992
SAP30	-2.52539	0.00025	-3.01704	0	2.22478	0.01135	0.37014	0.96224
FAM46B	-2.52536	0.00025	-2.69583	0	-1.7669	0.04266	-0.18164	0.98894
MET	-2.52524	0.00025	-1.00952	0.07359	-3.06633	0.00067	-0.16047	0.99137
SNX7	-2.52489	0.00025	-1.96418	0.00108	-8.26029	0	-1.99144	0.40568
OXSR1	-2.52482	0.00025	-2.14237	0.00047	-3.18154	0.00067	-1.97492	0.41337
C1orf183	-2.52472	0.00025	-2.83439	0	-4.2175	0	1.11288	0.78234
CDH6	-2.52462	0.00025	-0.83895	0.15189	-1.63299	0.06237	-0.08863	0.99556
POP4	-2.52442	0.00025	-2.56847	0	-0.04692	0.97224	2.14708	0.33354
C2orf27	-2.5241	0.00025	-2.44372	0.00018	-0.11789	0.92491	-0.938	0.84601
BCL2L11	-2.52406	0.00025	-2.73591	0	-3.43799	0.00036	0.7444	0.89823
CCDC8	2.52396	0.00025	2.68035	0	2.36824	0.00728	-0.73959	0.89823
CAPN1	2.52391	0.00025	2.81177	0	-3.3381	0.00036	1.59057	0.57477
SNAP23	-2.52387	0.00025	-2.82091	0	-3.32498	0.00036	0.27983	0.97782
SLC1A7	-2.52381	0.00025	-3.29743	0	-1.21503	0.18682	-0.95126	0.8445
GAP43	-2.52372	0.00025	-1.19756	0.03482	-4.47106	0	0.09391	0.99537
DFNA5	-2.52367	0.00025	-3.03339	0	-6.88157	0	-2.57101	0.19085
DBNDD1	-2.52366	0.00025	-2.79343	0	-0.87114	0.37119	0.26741	0.981
RGS17	-2.52364	0.00025	-0.94199	0.09809	-1.21971	0.18495	0.68443	0.91011
RTN4RL2	-2.52346	0.00025	-2.86074	0	-2.61646	0.00318	-0.33835	0.96708
LRRC2	-2.52294	0.00025	-2.18063	0.00047	-0.28909	0.80149	0.31312	0.97106
SBK1	-2.52287	0.00025	-3.04151	0	-0.73972	0.46167	0.40942	0.96082
PLCB4	-2.5226	0.00025	0.18062	0.8352	-1.91656	0.02859	-0.1507	0.99145
GAN	-2.5225	0.00025	-2.67388	0	-1.68432	0.05342	-0.93688	0.84601
HOXC10	2.52245	0.00025	1.33814	0.01978	4.62565	0	3.61862	0.02985
FLJ23834	-2.52192	0.00025	-0.83231	0.15613	-2.51668	0.00451	0.08327	0.99626
SDS	-2.52179	0.00025	-2.41645	0.00018	-2.15478	0.01405	-1.31117	0.6985
MKRN3	-2.52177	0.00025	-2.29998	0.00032	-1.93846	0.02648	-0.97394	0.83389
TNXB	-2.52176	0.00025	-2.40578	0.00018	-1.44238	0.10704	-1.11618	0.78081
RABIF	-2.5217	0.00025	-2.94781	0	-0.01465	0.99164	1.46414	0.62837
LNX2	-2.52136	0.00025	-2.73473	0	-3.60343	0	-0.5192	0.94237
C10orf12	-2.52092	0.00025	-2.77913	0	-0.36564	0.74607	-1.10011	0.78664
GGN	-2.52081	0.00025	-2.71735	0	-2.90545	0.00124	-0.33735	0.96765
PANX1	-2.52079	0.00025	-2.9878	0	-8.4752	0	-1.244	0.7247
CAV3	-2.52069	0.00025	-2.77784	0	-3.5302	0	0.41267	0.95953
TCF7L2	2.52031	0.00025	4.32103	0	4.01586	0	1.6743	0.54068
FAM110B	-2.5203	0.00025	-1.16222	0.03941	-5.77033	0	-1.42169	0.65272
APOBEC2	-2.52029	0.00025	-2.8548	0	-2.96374	0.00095	-0.73851	0.89823
HYPE	-2.52026	0.00025	-2.74965	0	0.5321	0.61743	0.33344	0.96777
EZH2	-2.51995	0.00025	-2.55863	0	-1.01472	0.2828	-1.24448	0.72444
IL6R	-2.51983	0.00025	-2.54066	0	-2.62452	0.00307	2.67372	0.16371
ERBB3	-2.5197	0.00025	-2.80164	0	-3.67307	0	0.73713	0.89823
GPC3	-2.51956	0.00025	-0.27618	0.70477	-2.16062	0.0138	-1.45623	0.63077
MTBP	-2.51858	0.00025	-2.57906	0	0.08293	0.94969	0.34205	0.96623
PITX3	-2.51856	0.00025	-3.06986	0	-2.30232	0.00889	-0.75078	0.89823
DPY19L4	-2.51856	0.00025	-2.83543	0	-1.81565	0.03825	-1.08038	0.79411
SGCE	-2.51836	0.00025	-3.42499	0	-4.98577	0	-0.71862	0.90289
TMEM106C	-2.51824	0.00025	-2.78088	0	-0.2216	0.85003	-1.51587	0.60347
DDB2	2.51821	0.00025	3.94596	0	4.2031	0	-0.56377	0.93738
SLC36A1	-2.51814	0.00025	-2.79789	0	-5.11898	0	-0.06347	0.99638
SRGAP3	-2.51814	0.00025	-0.22577	0.77504	-3.85601	0	-0.17729	0.98894
CDC2	-2.51782	0.00025	-2.73325	0	-0.10778	0.93224	-0.44683	0.95581
MGC70863	-2.51781	0.00025	-2.91877	0	-5.51791	0	-0.1017	0.99537
SLC37A3	-2.51769	0.00025	-1.11095	0.04815	-5.71016	0	-2.28405	0.28018
CHCHD1	-2.51761	0.00025	-2.68111	0	0.76261	0.44449	0.17801	0.98894
RTN4RL1	-2.51714	0.00025	-2.47144	0.00018	-1.42732	0.11143	-1.1925	0.74691
IGF1	2.51694	0.00025	4.21533	0	5.19475	0	1.5485	0.58868
IL17RB	-2.51682	0.00025	-3.08737	0	-2.66463	0.00286	-0.14536	0.99145
B3GNT2	-2.51628	0.00025	-2.78819	0	-2.73677	0.00225	-0.77142	0.8941
ITGB1	-2.51622	0.00025	-2.99178	0	-7.0813	0	-4.33822	0.01075
ME3	-2.51603	0.00025	-0.79493	0.17648	-2.70108	0.00264	-0.62196	0.925
BAIAP2L1	-2.51572	0.00025	-2.02077	0.00088	-3.14246	0.00067	-1.41246	0.65272
KIAA1211	-2.51569	0.00025	-0.94173	0.09812	-3.28826	0.00036	0.19158	0.98894
DSG2	-2.51543	0.00025	-3.07606	0	-7.94564	0	-0.91363	0.85162
PLXNB3	-2.51526	0.00025	-2.77772	0	-4.97641	0	0.16874	0.99014
RNF139	-2.51514	0.00025	-2.84584	0	-1.41526	0.11422	-0.90442	0.85632
MTMR11	-2.51508	0.00025	-2.8753	0	-6.82974	0	0.0133	0.9992
C13orf29	-2.51496	0.00025	-2.72471	0	-3.60137	0	-0.03777	0.9992
PCSK6	-2.51466	0.00025	-0.69852	0.23908	-8.66846	0	-1.30195	0.70063
MSL3L1	-2.51462	0.00025	-2.7749	0	0.28663	0.80294	-0.2209	0.98587
TMEM65	-2.5146	0.00025	-2.513	0	-7.00248	0	-1.12741	0.77263
OPN4	-2.51452	0.00025	-2.82551	0	-0.99808	0.29264	1.14015	0.76642
SLC25A24	-2.51435	0.00025	-2.60395	0	-3.81956	0	-0.23784	0.98435
MYPN	-2.51414	0.00025	-1.28135	0.02492	-1.26057	0.16729	-0.24491	0.98246
CLSPN	-2.51412	0.00025	-2.95789	0	-1.16743	0.20753	0.41275	0.95953
GCKR	-2.51404	0.00025	-2.79135	0	-2.27342	0.00977	0.04035	0.9992
AP3M1	-2.51403	0.00025	-2.72515	0	1.7326	0.04686	-1.1471	0.76557
FBXL22	-2.51384	0.00025	-2.72956	0	-3.20686	0.00036	0.21533	0.9872
SNX26	2.51371	0.00025	2.21439	0.00032	3.30223	0.00036	0.50938	0.94366
SOX7	-2.51356	0.00025	-2.71247	0	-2.70826	0.00264	-1.52567	0.6001
PDE6D	-2.5134	0.00025	-1.87783	0.00154	-4.20725	0	-0.13679	0.99145
FZD8	-2.51336	0.00025	-2.70986	0	-0.71225	0.48144	-0.64297	0.92182
SCN1A	-2.51311	0.00025	-1.01999	0.07002	-1.09702	0.23891	0.64336	0.92182
CAMK2B	-2.51308	0.00025	-2.80775	0	-1.45599	0.10302	1.36113	0.67345
NCAPD3	-2.51297	0.00025	-2.92439	0	1.41044	0.11553	-1.19727	0.74691
ANKRD40	-2.51293	0.00025	-2.67448	0	1.14713	0.21754	1.22046	0.73532
GUCY1A2	-2.5129	0.00025	-0.06573	0.946	-1.9851	0.02308	-1.15703	0.76312
DMRT2	-2.51285	0.00025	-2.75385	0	-5.24323	0	-1.58271	0.5769
SUSD1	-2.51275	0.00025	-1.62321	0.00605	-3.17259	0.00067	0.64126	0.92182
PNMA1	-2.5127	0.00025	-2.6979	0	-2.65275	0.00296	-1.12971	0.77082
HECW2	-2.51267	0.00025	-0.16597	0.85198	-3.07283	0.00067	0.04163	0.9992
RGS4	-2.51245	0.00025	-2.83913	0	-6.68972	0	-5.08772	0
TMEM51	-2.51245	0.00025	-1.922	0.00135	-1.70205	0.05097	0.71474	0.90297
CPNE7	-2.51225	0.00025	-2.7648	0	-0.33048	0.77183	-0.60622	0.92764
SRPX	-2.5122	0.00025	-2.28711	0.00032	-0.05627	0.96683	1.64217	0.55532
ST6GALNAC5	-2.512	0.00025	-0.49429	0.40115	-1.15852	0.21225	-0.61053	0.92697
SHC3	-2.51161	0.00025	-2.43147	0.00018	-1.81991	0.03793	-0.43725	0.95581
CDC42EP3	-2.51146	0.00025	-2.52199	0	-5.14243	0	-1.19311	0.74691
TMEM158	-2.51131	0.00025	-2.73998	0	-3.27469	0.00036	-2.01418	0.39356
GREB1	-2.51077	0.00025	-1.89623	0.00154	-1.85892	0.03353	-0.30139	0.97342
PCYT1B	-2.51067	0.00025	-2.44627	0.00018	-3.86373	0	0.7593	0.8979
MGC39900	-2.51058	0.00025	-2.9855	0	0.68942	0.49667	1.24869	0.72186
PCNXL2	2.51044	0.00025	2.99587	0	6.509	0	-0.17499	0.98948
XRCC4	-2.50997	0.00025	0.27984	0.69804	-0.47297	0.66285	1.87914	0.44741
ARSA	2.50983	0.00025	1.91666	0.00141	-0.14279	0.9056	-0.06237	0.99638
SERINC2	-2.50966	0.00025	-3.03978	0	-1.30886	0.15023	-0.49226	0.94853
TFAP2A	-2.50958	0.00025	-3.05439	0	-0.32693	0.7745	0.57414	0.93699
EFNB3	-2.50949	0.00025	-2.77566	0	-3.03176	0.00082	-1.99546	0.40387
KDELR3	-2.50946	0.00025	-3.11131	0	-8.50427	0	-1.27	0.71431
MME	-2.50935	0.00025	-2.02363	0.00082	-5.89923	0	0.82936	0.88312
METTL2B	-2.50929	0.00025	-2.48783	0.00018	0.18571	0.87517	-0.54411	0.93969
C6orf105	-2.50902	0.00025	-2.26818	0.00032	-3.54691	0	1.04091	0.80566
BTBD12	-2.50896	0.00025	-2.45764	0.00018	-2.30273	0.00889	-1.86375	0.45367
GTF2E1	-2.50879	0.00025	-2.61439	0	-0.37589	0.7388	0.43093	0.9583
IFNGR2	2.50879	0.00025	1.52729	0.0092	0.45552	0.67635	-0.13564	0.99145
TPPP	-2.50848	0.00025	-2.70716	0	-1.02533	0.27774	-1.27029	0.71431
PENK	-2.50837	0.00025	-2.7832	0	-4.224	0	0.14136	0.99145
BTK	-2.50831	0.00025	-2.50693	0.00011	0.15814	0.89542	0.27666	0.97912
APH1B	-2.50822	0.00025	-2.97907	0	1.843	0.03581	1.59817	0.57118
GPRC5A	-2.50819	0.00025	-2.68395	0	-1.62248	0.06349	-0.13638	0.99145
CEND1	-2.50801	0.00025	-2.75092	0	-1.85941	0.03353	-0.77936	0.8941
SCD	-2.50801	0.00025	-2.90989	0	-5.2293	0	-1.85441	0.45857
RANBP1	-2.50798	0.00025	-2.7078	0	-0.37051	0.74256	-0.26356	0.981
BRMS1	2.50794	0.00025	0.61739	0.30254	-0.16501	0.89038	0.11357	0.99449
PAX6	-2.5079	0.00025	-3.17361	0	-2.55988	0.00385	1.37654	0.66851
MUC12	-2.50788	0.00025	-2.28186	0.00032	-0.8697	0.3725	-0.0693	0.99636
STX2	-2.50769	0.00025	-2.70792	0	-4.60896	0	-1.40444	0.65749
IRX2	-2.50746	0.00025	-2.85712	0	-0.88704	0.36192	-0.18492	0.98894
RFK	-2.50736	0.00025	-2.79644	0	0.79007	0.42542	1.65842	0.54739
NOL14	-2.50712	0.00025	-2.72799	0	1.33075	0.14194	0.47744	0.95026
ACLY	-2.50699	0.00025	-2.4735	0.00018	-4.10951	0	-4.31589	0.01075
CANT1	-2.50693	0.00025	-2.96627	0	-2.82251	0.00177	-1.80188	0.48742
KIF2C	-2.50682	0.00025	-3.02419	0	-1.09896	0.23819	-0.14179	0.99145
CCDC112	-2.5068	0.00025	-2.79022	0	-2.32864	0.00836	0.77229	0.8941
WFDC1	-2.50678	0.00025	-3.09523	0	-3.69869	0	0.53314	0.94189
BRD4	2.50675	0.00025	3.37515	0	1.80722	0.03924	0.92489	0.85028
KIF7	-2.50657	0.00025	-2.63906	0	-0.34655	0.76043	-1.04408	0.80493
AKR1C3	-2.50649	0.00025	-2.11965	0.00047	-0.18093	0.87886	0.48439	0.94953
DACT3	-2.50645	0.00025	-2.75258	0	-1.74702	0.04494	0.232	0.98513
GUCY1B3	-2.5063	0.00025	-3.05031	0	-2.75505	0.002	-0.87966	0.86373
ELF2	-2.50607	0.00025	-0.65649	0.27123	0.0538	0.96836	-0.2096	0.98827
NOTUM	-2.50592	0.00025	-2.81372	0	-1.36844	0.12851	-0.85889	0.87323
HES6	-2.50581	0.00025	-2.66647	0	-2.73369	0.00225	-0.86684	0.86991
C11orf75	-2.50562	0.00025	-2.55179	0	-2.64585	0.00296	-0.34134	0.96647
FOXF2	-2.50533	0.00025	-2.91044	0	-4.64098	0	-0.65053	0.91971
C3orf55	-2.50532	0.00025	-2.98182	0	-0.48742	0.65149	0.37328	0.96224
MRPS14	-2.50528	0.00025	-2.99248	0	1.65303	0.05901	-1.73643	0.5139
F12	-2.50524	0.00025	-2.63034	0	-2.87551	0.00149	0.81075	0.88632
C8orf41	-2.50514	0.00025	-3.07734	0	1.51524	0.08811	0.03045	0.9992
CDH19	-2.50508	0.00025	-2.41621	0.00018	-2.44962	0.0052	0.56219	0.93738
CPA3	-2.5049	0.00025	-2.93796	0	-2.17755	0.01319	-0.84686	0.87692
ASB5	-2.50483	0.00025	-2.83001	0	-2.20435	0.0122	-1.29938	0.70391
EIF2B2	-2.50464	0.00025	-2.66219	0	0.54471	0.60838	-0.13912	0.99145
BCL11A	-2.50453	0.00025	-1.14566	0.04171	-2.76547	0.002	-0.93468	0.84623
TMEM46	-2.50441	0.00025	-2.86603	0	-3.3027	0.00036	-1.08291	0.79321
ADORA2B	-2.50439	0.00025	-2.81339	0	-6.81612	0	-1.41593	0.65272
DC2	-2.50438	0.00025	-2.8666	0	-5.01028	0	-2.42105	0.23333
HOXC11	2.50429	0.00025	1.74396	0.00346	6.37347	0	1.98022	0.41185
KIAA1324L	-2.50428	0.00025	-1.32003	0.0213	2.53291	0.00431	2.35733	0.25165
C10orf71	-2.50422	0.00025	-3.1278	0	-0.00344	0.99792	-0.02817	0.9992
PSMD10	-2.50417	0.00025	-2.94851	0	-0.51656	0.62892	0.24078	0.98371
NPNT	-2.50417	0.00025	-2.06693	0.00061	-0.21835	0.85259	1.32717	0.69137
CH25H	-2.50414	0.00025	-2.90058	0	-4.33205	0	-1.3863	0.66418
LOC129293	-2.50408	0.00025	-2.98145	0	-3.05941	0.00067	-0.31559	0.97076
C20orf29	-2.50399	0.00025	-2.56127	0	-1.05236	0.26298	-1.73637	0.5139
TMEM163	-2.50398	0.00025	-1.1106	0.0482	-0.75707	0.44873	-0.61843	0.92562
DPAGT1	-2.50396	0.00025	-2.84546	0	-2.8983	0.00124	-0.15176	0.99145
ENTPD7	-2.50361	0.00025	-2.95264	0	-4.09258	0	-1.80496	0.48497
LOC153328	-2.50356	0.00025	-3.14319	0	-3.39311	0.00036	-1.48801	0.61477
WWOX	2.50344	0.00025	2.50052	0.00018	1.55143	0.07912	1.55355	0.58688
RAD17	-2.50344	0.00025	-2.18296	0.00047	-1.31438	0.14766	-0.67031	0.91407
ADAMTS4	-2.5032	0.00025	-2.75323	0	-6.19354	0	0.20924	0.98827
KCNJ2	-2.5032	0.00025	-3.16059	0	-2.36609	0.00739	-0.82529	0.88408
ZNF101	-2.50317	0.00025	-2.64973	0	1.21027	0.18879	0.8762	0.86571
TINF2	-2.50307	0.00025	-2.68002	0	-0.70144	0.48871	-0.21571	0.9872
TUBB2A	-2.50306	0.00025	-2.7776	0	-7.08155	0	-2.26297	0.28708
IL17D	-2.50302	0.00025	-3.14385	0	-4.38981	0	0.47268	0.95151
SLC9A7	-2.50277	0.00025	-1.94589	0.00122	-2.23182	0.01119	0.4957	0.94814
KIAA1549	-2.50276	0.00025	-1.3748	0.01739	-3.03161	0.00082	-0.26213	0.981
SLC45A2	-2.50265	0.00025	-3.07724	0	-1.70933	0.05036	0.51371	0.94346
OBFC2B	-2.50261	0.00025	-2.66137	0	-2.15902	0.01397	-0.52122	0.94237
TXNL4B	-2.50257	0.00025	-2.72939	0	0.49541	0.6438	-0.25229	0.98171
MFSD9	-2.50236	0.00025	-2.79548	0	-0.98887	0.29852	-0.10209	0.99537
TMEM169	-2.50231	0.00025	-2.96422	0	-2.74017	0.00213	-0.43598	0.95581
NEU3	-2.50222	0.00025	-2.85121	0	0.37216	0.74146	-0.38704	0.96082
MTHFD1	-2.50195	0.00025	-2.84779	0	-0.25578	0.82503	0.32066	0.96949
CLEC1B	-2.50181	0.00025	-3.13877	0	-3.69854	0	-1.79868	0.48742
MMRN2	-2.50173	0.00025	-2.6233	0	-1.13686	0.22113	0.99207	0.82573
PANK3	-2.50165	0.00025	-2.72297	0	0.12302	0.92093	-0.57039	0.93738
SLC7A1	-2.50153	0.00025	-2.75912	0	-2.58879	0.00341	-0.91111	0.85284
PSMC3IP	-2.50151	0.00025	-2.71436	0	-0.69005	0.49615	-0.91661	0.85118
KCNAB2	-2.50136	0.00025	-2.74318	0	-2.03815	0.01959	0.46892	0.95208
PRUNE2	-2.50112	0.00025	-2.24689	0.00032	-3.20451	0.00036	-1.75711	0.50181
CD84	-2.50083	0.00025	-2.85891	0	-1.36647	0.12927	-0.03044	0.9992
TGFB2	-2.50081	0.00025	-1.00417	0.07527	-3.64783	0	-0.61524	0.92594
TSPAN12	-2.5008	0.00025	-3.03441	0	-0.39408	0.72492	0.22989	0.9852
ADAMTS20	-2.50047	0.00025	-0.89627	0.11863	-2.54941	0.00397	-0.19004	0.98894
GAL3ST4	-2.50036	0.00025	-2.71883	0	-4.97797	0	-5.66982	0
WNT2B	-2.50031	0.00025	-2.65073	0	-0.57211	0.58717	0.01792	0.9992
MBOAT2	-2.50028	0.00025	-1.27285	0.02584	-4.42945	0	-1.75165	0.51041
SESTD1	-2.50024	0.00025	-0.66046	0.26888	-2.27204	0.00984	0.14344	0.99145
PPARGC1B	-2.5001	0.00025	-2.4845	0.00018	0.31815	0.78098	0.48192	0.94953
TBL1Y	-2.5001	0.00025	-2.4458	0.00018	-0.08138	0.95007	0.15494	0.99145
KCNMB4	-2.50003	0.00025	-1.85486	0.0018	-2.72653	0.00239	-1.11322	0.78234
MGC33846	-2.50002	0.00025	-2.7035	0	-1.95339	0.02546	0.27403	0.97928
HSPA2	-2.50001	0.00025	-2.97239	0	-3.90333	0	-1.16867	0.75662
GRASP	2.4998	0.00025	2.09127	0.00061	-1.73583	0.0461	0.70132	0.90663
SCYL1	2.49974	0.00025	0.27364	0.70828	-2.85773	0.00149	0.12345	0.99199
C1orf93	-2.4996	0.00025	-2.82456	0	-5.14547	0	-0.40525	0.96082
ARF6	-2.4995	0.00025	-3.04789	0	-2.72877	0.00239	0.77764	0.8941
KLHL6	-2.49945	0.00025	-3.01269	0	-1.80955	0.03895	-0.48679	0.94902
PLCG1	2.49917	0.00025	0.18775	0.82633	-2.61078	0.00318	0.95373	0.84384
MBOAT1	-2.49908	0.00025	-1.04487	0.06319	-1.83636	0.0362	0.49162	0.94853
LOC285382	-2.49907	0.00025	-3.06477	0	-2.63473	0.00307	-0.45068	0.95581
TLN2	-2.49907	0.00025	-0.86626	0.13568	-2.79106	0.002	-0.15574	0.99137
C1orf61	-2.49901	0.00025	-3.04941	0	-0.07073	0.95676	-1.4326	0.64646
PHLDB2	-2.49897	0.00025	-1.80561	0.00245	-8.00615	0	-3.08017	0.08163
CCDC86	-2.49889	0.00025	-2.78601	0	-1.68797	0.05291	-0.40642	0.96082
RBM7	-2.49886	0.00025	-2.83358	0	1.42967	0.11055	0.63374	0.92182
LOC200312	-2.4985	0.00025	-2.6377	0	-0.66664	0.51527	0.46051	0.95278
MGAT5	-2.49849	0.00025	-0.9336	0.10117	-4.83924	0	0.72041	0.90289
RNF152	-2.49813	0.00025	-1.91426	0.00141	-3.12356	0.00067	-0.86748	0.86991
PBK	-2.49808	0.00025	-2.78821	0	-0.28401	0.80468	0.73928	0.89823
AATK	-2.49798	0.00025	-2.84608	0	-1.17597	0.20451	1.17022	0.75595
MTMR2	-2.4979	0.00025	-1.01774	0.07072	-3.34099	0.00036	0.05955	0.99689
GADD45G	-2.49771	0.00025	-2.90184	0	-2.0554	0.01856	-0.27403	0.97928
ZNF394	-2.49766	0.00025	-2.89532	0	4.36999	0	1.69154	0.53501
C14orf139	-2.49761	0.00025	-2.71377	0	-2.54749	0.00409	0.51069	0.94366
COX17	-2.49756	0.00025	-2.80337	0	-0.11123	0.93041	-1.58189	0.5769
MRE11A	-2.49755	0.00025	-2.44432	0.00018	3.22003	0.00036	1.0378	0.80743
PFAS	-2.49735	0.00025	-2.63597	0	2.11747	0.01612	0.93166	0.84886
SOX13	-2.49725	0.00025	-2.5494	0	-2.07633	0.01771	1.20321	0.74683
POLR2J2	-2.49722	0.00025	-2.52231	0	1.85845	0.03361	1.68426	0.53743
STT3A	-2.49717	0.00025	-3.03138	0	-4.07007	0	-1.69784	0.53358
CDCP1	-2.49713	0.00025	-2.23055	0.00032	-1.90225	0.02945	-0.13482	0.99145
SNAI1	-2.49686	0.00025	-2.83871	0	-6.98778	0	-3.27665	0.05699
C1orf176	-2.4966	0.00025	-2.84187	0	0.08516	0.9476	0.47053	0.95208
C14orf138	-2.4964	0.00025	-2.71851	0	-0.23987	0.83673	1.41495	0.65272
KCNJ11	-2.49639	0.00025	-2.54297	0	-0.05477	0.96802	0.25673	0.98135
ELMOD2	-2.49637	0.00025	-2.88351	0	-0.99448	0.29447	-0.0483	0.99887
PI4K2B	-2.49636	0.00025	-2.93201	0	-4.37171	0	-1.4018	0.65977
ADSSL1	-2.49632	0.00025	-2.85534	0	0.17393	0.88394	-0.18372	0.98894
LGI2	-2.49616	0.00025	-3.14201	0	-5.88228	0	-2.55037	0.19365
ACRC	-2.49594	0.00025	-2.69179	0	-0.52882	0.61954	1.17837	0.7532
SORT1	-2.49589	0.00025	-2.49306	0.00018	-1.71287	0.04962	0.63103	0.92245
KIF27	-2.49585	0.00025	-2.88133	0	2.32887	0.00836	0.77588	0.8941
PPP1R3C	-2.49583	0.00025	-2.80108	0	-5.31567	0	-0.89682	0.85849
PRC1	-2.49577	0.00025	-2.89081	0	0.27937	0.8089	-0.69888	0.90663
FAM126A	-2.49569	0.00025	-2.51349	0	-0.83979	0.39127	0.47217	0.95166
TNFAIP8L3	-2.49569	0.00025	-2.83204	0	-2.87706	0.00149	1.39484	0.65979
AFAP1L1	-2.4955	0.00025	-0.35535	0.58094	-4.25024	0	-1.82613	0.4731
TXNDC9	-2.49544	0.00025	-2.8677	0	-2.02183	0.02093	-1.31432	0.69812
ATP1A2	-2.49544	0.00025	-2.98259	0	-2.57916	0.00353	-0.52066	0.94237
C1orf212	-2.49538	0.00025	-2.63978	0	-1.07341	0.25132	0.80739	0.88632
SULT2B1	-2.49521	0.00025	-2.84843	0	-0.75719	0.44856	-0.95164	0.8445
DSC2	-2.49502	0.00025	-3.18337	0	-5.21605	0	-2.14877	0.33271
EPB49	-2.49499	0.00025	-1.85851	0.00166	-1.65044	0.05925	1.6345	0.55673
MKI67IP	-2.4949	0.00025	-2.83424	0	1.8124	0.03865	-0.32699	0.96815
LY86	-2.49487	0.00025	-2.97114	0	-0.90341	0.35121	2.38184	0.24229
NPHP1	-2.49453	0.00025	-1.55494	0.00784	1.87258	0.03268	0.65964	0.91803
APOC2	-2.49453	0.00025	-3.00067	0	0.80839	0.41302	-0.77837	0.8941
C4orf27	-2.4945	0.00025	-2.80973	0	-1.88618	0.03102	-0.72705	0.90155
TMEM92	-2.49433	0.00025	-2.71694	0	-2.31014	0.0086	0.06124	0.99676
PTPN3	-2.49417	0.00025	-0.82045	0.16329	0.35979	0.75064	0.49017	0.94864
FZD9	-2.49417	0.00025	-3.16188	0	-2.76654	0.002	0.85596	0.87482
MTERF	-2.49397	0.00025	-2.93433	0	2.6404	0.00296	1.83212	0.4673
ARHGAP23	-2.49378	0.00025	-3.02645	0	-2.75663	0.002	-0.95809	0.84178
RNF122	-2.49373	0.00025	-2.90778	0	-4.05247	0	-0.6103	0.92703
NUDT17	-2.49372	0.00025	-2.71228	0	5.28834	0	1.17842	0.7532
EFTUD1	-2.49366	0.00025	-1.02556	0.06819	-1.91873	0.02835	-0.07719	0.99626
MSN	-2.49361	0.00025	-2.7121	0	-4.954	0	-2.05247	0.37706
MESDC1	-2.49348	0.00025	-2.71575	0	-2.71763	0.00264	-0.975	0.83321
SFT2D2	-2.49337	0.00025	-2.70082	0	-1.49203	0.09363	0.91813	0.85093
CCDC85A	-2.49336	0.00025	-1.0613	0.05915	1.88515	0.03126	1.3235	0.69364
ZNF699	-2.49334	0.00025	-2.78231	0	0.84845	0.38505	0.98933	0.82766
MTMR10	-2.49333	0.00025	-2.76053	0	-0.06234	0.96302	0.27326	0.9793
LOXL3	-2.49325	0.00025	-2.95497	0	-1.35643	0.1334	-1.06933	0.7976
PPEF1	-2.49324	0.00025	-2.70443	0	-1.17993	0.20219	-2.02416	0.39282
DCLRE1B	-2.49304	0.00025	-2.73825	0	-1.41085	0.11548	0.38555	0.96082
SIM2	-2.49304	0.00025	-2.93	0	-0.79304	0.42342	1.1436	0.76605
LOC388524	-2.4929	0.00025	-2.96228	0	6.13877	0	0.52698	0.94226
SUGT1	-2.49286	0.00025	-3.07931	0	1.68576	0.05317	-0.11032	0.99459
C14orf24	-2.49285	0.00025	-2.30509	0.00032	-4.25183	0	-2.41594	0.23393
HS3ST3B1	-2.49281	0.00025	-3.01233	0	-5.58258	0	-0.5083	0.94388
HIST1H1E	-2.49276	0.00025	-2.65438	0	-1.573	0.07472	-0.00794	0.9992
EIF5A2	-2.49274	0.00025	-2.96673	0	-2.92139	0.00124	0.01729	0.9992
AMD1	-2.49266	0.00025	-2.89987	0	-0.56998	0.58913	0.15336	0.99145
KIF4A	-2.49241	0.00025	-2.78136	0	0.52588	0.62174	-0.63854	0.92182
KCNN2	-2.49241	0.00025	-2.06605	0.00061	-2.17495	0.01354	-1.58113	0.5769
SERTAD4	-2.49239	0.00025	-2.91801	0	-3.46296	0.00036	-0.06028	0.99689
COX18	-2.49232	0.00025	-2.8948	0	1.08426	0.24588	0.96152	0.83887
KIAA1822L	-2.49227	0.00025	-2.9645	0	-0.29063	0.80029	-0.81792	0.88534
MRAS	-2.49212	0.00025	-2.65513	0	-3.71123	0	-1.51244	0.60608
FRK	-2.49211	0.00025	-2.16583	0.00047	-1.84696	0.03506	-1.22272	0.73296
DCST1	-2.49206	0.00025	-2.65632	0	1.17212	0.20618	-0.74571	0.89823
ZNF549	-2.49206	0.00025	-2.68893	0	3.44046	0.00036	-0.51488	0.94333
STX1A	-2.49202	0.00025	-2.77752	0	-3.2978	0.00036	-0.63758	0.92182
NCF2	-2.49201	0.00025	-2.8399	0	-1.18252	0.2009	0.25994	0.981
RAI2	-2.49196	0.00025	-3.11256	0	-4.70439	0	-0.2939	0.97549
SMTNL2	-2.49195	0.00025	-2.92375	0	-4.51452	0	-0.36171	0.96274
SIM1	-2.49192	0.00025	-2.21801	0.00032	-1.17967	0.20242	0.46718	0.95208
SHCBP1	-2.49188	0.00025	-3.09886	0	-2.51448	0.00451	0.5343	0.94189
LYST	-2.49182	0.00025	-0.68206	0.25282	-2.189	0.0127	-0.26395	0.981
PTPLA	-2.4918	0.00025	-2.84908	0	-5.79677	0	0.46734	0.95208
GDNF	-2.49166	0.00025	-3.08026	0	-3.02526	0.00082	-0.95652	0.84258
MMACHC	-2.49158	0.00025	-2.87279	0	1.77841	0.04225	0.54916	0.93942
C6orf211	-2.49155	0.00025	-2.67733	0	-1.82029	0.03786	0.79561	0.89117
TFAP2C	-2.49148	0.00025	-2.96187	0	-3.93774	0	-0.09245	0.99556
BBS7	-2.49138	0.00025	-2.90169	0	1.01382	0.28349	-0.86616	0.86991
BCAS4	-2.49133	0.00025	-3.15133	0	-1.16663	0.20767	1.7022	0.53257
PPA1	-2.49131	0.00025	-2.79647	0	-2.14986	0.01443	-1.5263	0.6001
TERT	-2.49112	0.00025	-2.38562	0.00018	0.15528	0.89737	0.08245	0.99626
ACTR1A	2.49104	0.00025	2.27501	0.00032	-2.68967	0.00273	1.00257	0.8254
KCNJ15	-2.49094	0.00025	-3.02863	0	-2.51182	0.00451	1.41074	0.65411
TNMD	-2.49093	0.00025	-3.10175	0	-2.41587	0.00615	1.00673	0.82321
ALDH3B1	-2.49087	0.00025	-2.82594	0	-2.40888	0.00635	-2.13625	0.33495
GUCY1A3	-2.49082	0.00025	-2.38327	0.00018	-3.68936	0	-2.71582	0.15147
TSPAN2	-2.49063	0.00025	-2.82974	0	-1.47275	0.0987	-3.306	0.05699
ZNF70	-2.49058	0.00025	-3.03243	0	0.29565	0.79691	-0.14674	0.99145
GPRC5B	-2.49045	0.00025	-2.66626	0	-3.71428	0	-0.46037	0.95278
SLITRK4	-2.49037	0.00025	-2.83323	0	-0.76426	0.44292	-0.65138	0.91971
C20orf186	-2.49031	0.00025	-3.14754	0	-0.56786	0.59083	-0.53754	0.94091
TDO2	-2.49028	0.00025	-3.22332	0	-2.21956	0.01164	-1.17016	0.75595
OTUD1	-2.49024	0.00025	-2.71457	0	-0.80534	0.41509	0.15154	0.99145
RTN1	-2.49016	0.00025	-0.14027	0.87622	0.20441	0.86128	1.9007	0.43734
APLN	-2.49014	0.00025	-2.06855	0.00061	-1.22784	0.18185	0.18467	0.98894
CLIC4	-2.49014	0.00025	-0.68239	0.25272	-4.0065	0	-2.70196	0.15658
TSPAN4	2.49002	0.00025	2.87711	0	-1.64549	0.06011	0.33171	0.96777
SGCG	-2.48993	0.00025	-1.46828	0.01198	-3.07034	0.00067	-0.82159	0.88408
SMOC1	-2.48979	0.00025	-1.89019	0.00154	-0.07691	0.95275	0.29906	0.97365
NOLA1	-2.48978	0.00025	-2.69276	0	-1.40805	0.11622	-0.24544	0.9824
ZBTB5	-2.48967	0.00025	-2.96022	0	0.19047	0.87105	0.71229	0.90297
LDHA	-2.48955	0.00025	-2.96578	0	-3.61328	0	-2.21973	0.30833
C4orf21	-2.48953	0.00025	-2.99873	0	-1.22819	0.18157	-0.39858	0.96082
CA9	-2.48952	0.00025	-2.64989	0	1.93897	0.02648	0.00477	0.9992
IGSF1	-2.4895	0.00025	-1.4466	0.01269	-0.27018	0.81455	0.53617	0.94159
SLC16A9	-2.48945	0.00025	-2.87923	0	-2.26386	0.01004	-1.56749	0.58121
BFSP1	-2.48941	0.00025	-2.56069	0	-1.84192	0.03581	1.03408	0.80897
ABHD13	-2.48939	0.00025	-2.97863	0	1.00135	0.29034	-0.48059	0.94953
LCTL	-2.48938	0.00025	-3.03454	0	-3.90211	0	-1.64597	0.55532
AJAP1	-2.48936	0.00025	-1.48714	0.01085	-2.46922	0.00499	0.35671	0.96275
SYCE2	-2.48934	0.00025	-2.41254	0.00018	0.5486	0.60513	0.30936	0.97192
NCAPG2	-2.48914	0.00025	-2.92764	0	0.73791	0.46273	0.0853	0.99626
TIRAP	-2.48906	0.00025	-2.5129	0	-0.85537	0.38164	0.14894	0.99145
SLPI	-2.48898	0.00025	-2.69418	0	-0.18586	0.87486	0.31017	0.97192
TMEM44	-2.48895	0.00025	-0.90083	0.11598	-1.05429	0.26203	-0.09161	0.99556
EFHD1	-2.48894	0.00025	-2.24008	0.00032	-1.80491	0.03936	0.59165	0.93206
CYTL1	-2.48884	0.00025	-2.62979	0	-1.17272	0.20612	1.2236	0.73296
COL2A1	-2.48877	0.00025	-2.85888	0	-1.05671	0.26061	0.565	0.93738
PTRH2	-2.48871	0.00025	-2.50964	0.00011	0.05128	0.96981	-0.02902	0.9992
ELF4	-2.48863	0.00025	-2.767	0	-11.5602	0	-1.49523	0.61275
TNFSF4	-2.48857	0.00025	-2.8145	0	-5.09745	0	-2.01988	0.39331
TXNRD3	-2.48848	0.00025	-3.03269	0	1.2131	0.1876	1.10888	0.78302
GRIP1	-2.48838	0.00025	-0.23008	0.76855	-2.85303	0.00149	1.28506	0.70847
AIRE	-2.48824	0.00025	-2.84907	0	-1.05651	0.26076	-0.98503	0.82882
PRR6	-2.48824	0.00025	-2.82954	0	-1.9673	0.02437	-0.0793	0.99626
PCTP	-2.48824	0.00025	-2.84349	0	-2.07722	0.01771	1.35296	0.67822
TMEM100	-2.48823	0.00025	-3.10114	0	-1.43691	0.10876	-0.74071	0.89823
NUP50	-2.48822	0.00025	-3.04826	0	-0.16587	0.89034	-0.36329	0.96262
HNF4A	-2.48809	0.00025	-2.78253	0	0.07022	0.95726	0.97285	0.83452
ZNF275	-2.48806	0.00025	-2.98274	0	-1.94441	0.02619	-1.51083	0.60608
RGS3	-2.48804	0.00025	-1.18826	0.03608	-3.08758	0.00067	-0.9457	0.84555
ADAMTS18	-2.48803	0.00025	-0.68922	0.24686	-1.9345	0.0267	1.21332	0.73964
SLC25A23	-2.48802	0.00025	-2.97585	0	-1.3703	0.12802	-1.93239	0.4287
SSTR2	-2.488	0.00025	-2.58224	0	0.30229	0.79233	0.39667	0.96082
IGSF10	-2.48789	0.00025	-2.90599	0	-1.47081	0.09923	-0.93888	0.84601
NXT1	-2.48788	0.00025	-2.7521	0	-2.02616	0.02058	1.21752	0.73595
RAD54L	-2.48785	0.00025	-2.66592	0	-0.59177	0.57319	-0.15832	0.99137
L1CAM	-2.48785	0.00025	-2.94204	0	-1.67326	0.05521	1.44815	0.63715
PPIL5	-2.48784	0.00025	-2.99556	0	0.88553	0.36248	0.60682	0.92764
MMP13	-2.48779	0.00025	-2.72281	0	-3.69305	0	-0.35723	0.96275
LMNB1	-2.48769	0.00025	-2.73435	0	-0.91706	0.34287	-0.51238	0.94346
7A5	-2.48742	0.00025	-1.50199	0.01035	0.90466	0.35033	-0.27796	0.97889
PUS7L	-2.48721	0.00025	-3.09118	0	0.22962	0.84441	-0.58607	0.93464
HAVCR1	-2.48714	0.00025	-2.76914	0	-2.13633	0.01474	1.41804	0.65272
TTC13	-2.48703	0.00025	-3.04936	0	-2.13735	0.01474	0.03577	0.9992
RPL6	-2.48687	0.00025	-2.80728	0	0.70212	0.48802	-0.8834	0.86233
CEP55	-2.48679	0.00025	-3.07627	0	-3.26078	0.00036	-0.16473	0.99014
SNTB1	-2.48675	0.00025	-0.0958	0.91996	-5.18445	0	-1.2956	0.70532
TEKT2	-2.48669	0.00025	-2.69162	0	-1.37334	0.12692	0.97181	0.83459
ZNF433	-2.48668	0.00025	-2.52835	0	2.2894	0.00952	0.67048	0.91407
PLS1	-2.48665	0.00025	-2.62584	0	1.26815	0.16463	0.00397	0.9992
TGFA	-2.48659	0.00025	-2.1792	0.00047	0.02033	0.98819	1.14917	0.76545
FSD2	-2.48659	0.00025	-2.8346	0	-0.25829	0.82377	-0.26711	0.981
ZNF93	-2.48657	0.00025	-2.82061	0	-1.12873	0.22464	0.79	0.89316
HTATIP2	-2.48655	0.00025	-2.79509	0	-0.56875	0.59005	-0.23556	0.98497
CYP24A1	-2.48651	0.00025	-2.87115	0	-1.77574	0.04242	-1.70512	0.5303
ERCC6	-2.48647	0.00025	-2.61826	0	2.5365	0.00431	1.73625	0.5139
NRBF2	-2.48639	0.00025	-2.93625	0	-5.00939	0	0.77278	0.8941
MFSD2	-2.48637	0.00025	-2.89708	0	-3.20385	0.00036	0.40542	0.96082
REP15	-2.48632	0.00025	-2.75916	0	0.26546	0.81777	-0.14303	0.99145
AGT	-2.48624	0.00025	-2.74423	0	-2.05466	0.01856	0.18319	0.98894
PLEKHA9	-2.48623	0.00025	-2.99063	0	-2.63682	0.00307	-0.34012	0.96708
RFC5	-2.48607	0.00025	-2.9235	0	3.21666	0.00036	-0.48612	0.94902
SCIN	-2.48602	0.00025	-2.55682	0	0.26628	0.81734	-1.10864	0.78302
ZNF45	-2.48602	0.00025	-2.98045	0	2.70384	0.00264	-0.80853	0.88632
LMO1	-2.486	0.00025	-3.0333	0	-1.21595	0.18652	1.0274	0.81295
CREG2	-2.486	0.00025	-2.97925	0	-0.85626	0.38146	0.60932	0.92703
TPO	-2.48596	0.00025	-2.11431	0.00047	-1.45475	0.10327	0.46344	0.95232
FANCG	-2.48594	0.00025	-2.703	0	0.01857	0.98945	1.74449	0.5139
IRX1	-2.48583	0.00025	-2.81727	0	-2.68512	0.00273	1.30647	0.69881
MYT1	-2.48569	0.00025	-2.49603	0.00018	-0.3864	0.7304	-1.76536	0.49672
DUPD1	-2.48563	0.00025	-3.1826	0	-1.4214	0.11296	0.1734	0.98965
COL9A3	-2.48563	0.00025	-2.72757	0	-1.16649	0.20774	-0.37549	0.96222
FSD1L	-2.48546	0.00025	-2.75817	0	-3.33634	0.00036	-0.94411	0.84594
KCNN3	-2.48543	0.00025	-0.46114	0.43086	-2.00427	0.02262	-0.55409	0.93767
CMTM3	-2.4854	0.00025	-2.99247	0	-5.31982	0	-2.78328	0.13372
LOC388610	-2.4854	0.00025	-2.65625	0	-2.58047	0.00353	0.88826	0.86185
C12orf11	-2.48519	0.00025	-3.09561	0	-0.50848	0.6346	0.5614	0.93738
BSPRY	-2.48517	0.00025	-3.04502	0	-0.52933	0.61921	-1.74341	0.5139
APAF1	-2.48515	0.00025	-2.14375	0.00047	-4.16765	0	-0.28715	0.97669
FRRS1	-2.4851	0.00025	-2.44585	0.00018	2.22973	0.01119	-0.7747	0.8941
FOXL2	-2.48503	0.00025	-2.96769	0	-1.86711	0.03299	0.58982	0.93267
ARL10	-2.48496	0.00025	-2.61439	0	-3.90625	0	0.23224	0.98513
C6orf60	-2.48484	0.00025	-0.54451	0.36104	-0.35874	0.75148	1.48018	0.62023
ASTE1	-2.48484	0.00025	-2.92985	0	0.8971	0.35533	0.58476	0.93514
FLJ14154	2.48464	0.00025	1.48388	0.01101	-2.40586	0.00635	-3.2117	0.06604
DSG3	-2.4846	0.00025	-3.06483	0	-0.65106	0.52732	-0.32338	0.96945
GSTM3	-2.48458	0.00025	-2.5865	0	0.71906	0.47687	-0.83663	0.87907
ALDH8A1	-2.48447	0.00025	-3.02583	0	0.15098	0.90036	1.15069	0.76458
FKBP1B	-2.48427	0.00025	-2.9795	0	2.52525	0.00451	0.55635	0.93747
NRG4	-2.48414	0.00025	-2.90683	0	1.78394	0.0414	-0.3366	0.96777
ZNF41	-2.48408	0.00025	-2.68625	0	-1.68051	0.05429	0.54493	0.93969
GRIP2	-2.48407	0.00025	-3.11563	0	-0.01459	0.99164	-0.6097	0.92703
APIP	-2.48401	0.00025	-2.7316	0	1.42867	0.11106	-0.18827	0.98894
THRB	-2.48383	0.00025	0.39919	0.51853	-2.36148	0.00749	-0.17345	0.98965
ZNF746	-2.48369	0.00025	-2.90311	0	-2.45202	0.0052	-1.81163	0.4814
SYT12	-2.48362	0.00025	-2.9877	0	-2.03394	0.01975	-1.36589	0.6717
OCLN	-2.48362	0.00025	-2.45067	0.00018	1.44082	0.10755	0.76497	0.89578
KIAA0644	-2.4836	0.00025	-2.73848	0	-3.97139	0	0.35481	0.96289
RPS26	-2.48359	0.00025	-2.91449	0	-0.2681	0.81566	-0.98997	0.82766
TROAP	-2.48356	0.00025	-2.66439	0	-1.50013	0.092	0.21644	0.9872
NOTCH3	-2.4835	0.00025	-2.33056	0.00026	-4.72833	0	0.78029	0.8941
KIF14	-2.48346	0.00025	-2.94125	0	-1.26073	0.16716	-0.20955	0.98827
BCMO1	-2.4833	0.00025	-2.9226	0	-0.10887	0.93167	-0.02171	0.9992
UBTD1	2.4833	0.00025	3.18007	0	-1.69872	0.0513	-2.00943	0.39575
MAN1C1	-2.48318	0.00025	-2.77857	0	-6.10985	0	-1.38166	0.6668
SNX10	-2.48311	0.00025	-2.57152	0	-1.25697	0.16894	0.31102	0.97191
IL19	-2.48309	0.00025	-2.82339	0	-1.7744	0.04242	0.19771	0.98853
PDCL	-2.48306	0.00025	-2.75639	0	-1.79549	0.03996	-2.72	0.15147
RSPO1	-2.48301	0.00025	-3.12686	0	-3.51641	0	-0.18819	0.98894
GBP5	-2.48277	0.00025	-2.93658	0	-1.15342	0.21485	-1.73651	0.5139
LSM12	-2.48266	0.00025	-2.72331	0	-2.08544	0.01753	-0.06337	0.99638
LCMT1	2.4826	0.00025	1.74543	0.00346	0.13467	0.91248	-1.07895	0.79438
ZNF223	-2.48242	0.00025	-2.80801	0	2.06223	0.01826	0.39576	0.96082
RBMX2	-2.4824	0.00025	-2.88023	0	1.12686	0.22523	-1.08033	0.79411
ZFP37	-2.48234	0.00025	-3.0669	0	2.34136	0.00798	0.03011	0.9992
C17orf51	-2.48233	0.00025	-2.68986	0	-0.59657	0.56885	-0.57773	0.93596
KIRREL3	-2.48218	0.00025	0.07882	0.9346	-1.65502	0.05881	0.82476	0.88408
ING1	-2.48213	0.00025	-2.58591	0	-0.88127	0.36507	-0.902	0.85849
FAM89A	-2.48212	0.00025	-2.91337	0	-6.28454	0	-3.04114	0.08915
SMYD1	-2.48197	0.00025	-3.06478	0	-1.78318	0.04146	-0.64192	0.92182
SPATA9	-2.48196	0.00025	-3.02155	0	-0.94636	0.32418	0.80801	0.88632
CDCA8	-2.4819	0.00025	-3.08534	0	1.77648	0.04242	-0.89759	0.85849
APC2	-2.48178	0.00025	-2.87717	0	-2.07846	0.01771	-0.0569	0.99736
GPX7	-2.48167	0.00025	-3.03123	0	-0.64312	0.53338	1.54863	0.58868
FEM1C	-2.48158	0.00025	-3.01598	0	-4.6431	0	-1.67553	0.54068
C12orf53	-2.48156	0.00025	-2.761	0	-4.53	0	-3.91255	0.01869
TOR3A	-2.48154	0.00025	-2.44687	0.00018	1.05941	0.25914	0.21316	0.98801
ZNF175	-2.48153	0.00025	-2.75982	0	3.45728	0.00036	0.74293	0.89823
THOC7	-2.48153	0.00025	-2.68705	0	2.22898	0.01119	-0.98831	0.82787
CCDC110	-2.48147	0.00025	-3.07171	0	-2.41186	0.00635	-0.98208	0.83193
ADCY8	-2.48145	0.00025	-0.22989	0.76882	-1.1649	0.20862	0.13721	0.99145
CCT5	-2.48145	0.00025	-2.75668	0	-0.6263	0.54657	-0.25399	0.98171
LGR5	-2.48143	0.00025	-0.60818	0.3071	-2.96395	0.00095	-0.8228	0.88408
TLR2	-2.48137	0.00025	-3.12678	0	-1.0581	0.26005	1.12953	0.77095
DEPDC1B	-2.48131	0.00025	-2.41864	0.00018	0.08532	0.94755	0.10376	0.99536
ZNF239	-2.48126	0.00025	-2.69782	0	-0.321	0.77826	0.17769	0.98894
PROX1	-2.48126	0.00025	-2.64253	0	0.78095	0.43259	-1.38484	0.66515
CP	-2.48124	0.00025	-3.01617	0	-0.99106	0.29688	0.12527	0.99145
GPC4	-2.48119	0.00025	-2.54947	0	-0.69465	0.4928	0.54142	0.94016
CD177	-2.48118	0.00025	-2.94787	0	-1.02519	0.27774	0.33189	0.96777
BMP3	-2.48115	0.00025	-2.27001	0.00032	-0.03323	0.98045	-2.43268	0.22985
FUT4	-2.48102	0.00025	-2.72848	0	-1.65025	0.0593	-0.217	0.98708
LOC202051	-2.48096	0.00025	-2.48214	0.00018	-1.8235	0.03757	1.78403	0.48996
GGT1	-2.48094	0.00025	-2.89206	0	-0.59089	0.57375	-0.10454	0.99518
KLF15	-2.48091	0.00025	-2.78971	0	-0.16547	0.89034	1.14688	0.76557
MSX2	-2.48088	0.00025	-2.93407	0	-2.74224	0.00213	0.43399	0.95662
LOC283514	-2.48087	0.00025	-2.61551	0	-0.04251	0.97537	0.37622	0.96222
UBE2E3	-2.48085	0.00025	-2.27051	0.00032	-3.33809	0.00036	-2.49769	0.20825
ARNTL2	-2.48082	0.00025	-2.13449	0.00047	-8.72269	0	-0.13382	0.99145
PSME2	-2.48082	0.00025	-2.75829	0	0.64844	0.52872	0.35882	0.96274
NPTX1	-2.48079	0.00025	-2.80147	0	1.51124	0.08865	0.22577	0.9852
SLC30A6	-2.48071	0.00025	-2.71289	0	-1.03399	0.27283	-0.97695	0.8327
NEK3	-2.48071	0.00025	-2.84161	0	-3.16167	0.00067	-0.05317	0.99804
CDH17	-2.48069	0.00025	-2.78757	0	-0.36354	0.74779	-0.60525	0.92824
C1orf53	-2.48068	0.00025	-3.02137	0	-0.9886	0.2986	0.6925	0.90725
STEAP4	-2.48066	0.00025	-2.79344	0	-1.33885	0.13946	1.11874	0.77994
CIT	-2.48062	0.00025	-0.44415	0.44942	-1.9384	0.02648	-0.05406	0.99787
CCDC77	-2.48055	0.00025	-2.94615	0	-0.4484	0.68214	0.00945	0.9992
BHLHB5	-2.48047	0.00025	-2.70898	0	-1.21839	0.1855	-0.85292	0.87548
TCP1	-2.48047	0.00025	-2.73196	0	-0.1685	0.88771	-1.43891	0.64385
NINJ2	-2.48041	0.00025	-2.75926	0	-1.40528	0.11685	-0.20136	0.98827
MDAC1	-2.4803	0.00025	-2.7075	0	-1.0179	0.28154	0.25322	0.98171
CD109	-2.48023	0.00025	-3.33687	0	-6.93751	0	-4.098	0.01075
GMEB1	-2.48014	0.00025	-1.65842	0.00534	-1.44213	0.10704	1.16965	0.75618
HERC5	-2.4801	0.00025	-3.02484	0	-0.61915	0.55253	0.06861	0.99636
GINS3	-2.48009	0.00025	-2.98296	0	-0.23285	0.84106	-0.85234	0.87592
HOXD8	-2.48003	0.00025	-2.99619	0	-4.37914	0	0.55809	0.93738
BMP8A	-2.47996	0.00025	-3.09892	0	-2.39585	0.00653	0.15796	0.99137
PRLR	-2.47993	0.00025	-0.76198	0.19442	-1.23888	0.1766	0.02605	0.9992
MYCT1	-2.4799	0.00025	-2.68173	0	-1.99668	0.02277	0.07428	0.99626
DGKG	-2.47989	0.00025	-0.4696	0.42073	-2.00107	0.02262	-0.96389	0.83795
KIF18A	-2.47984	0.00025	-2.26275	0.00032	0.62175	0.54999	0.10271	0.99537
MPP3	-2.47969	0.00025	-1.78218	0.00263	-1.87775	0.03223	-0.52611	0.94226
TMEM108	-2.47967	0.00025	-0.14667	0.87012	-6.48943	0	-0.36134	0.96274
ZNF616	-2.47966	0.00025	-2.81103	0	0.50083	0.63953	-1.41972	0.65272
SNX24	-2.47957	0.00025	-1.34804	0.01887	-3.16317	0.00067	-0.92108	0.85093
ACTA1	-2.47952	0.00025	-1.8282	0.00206	-4.35488	0	-0.09413	0.99537
GRM1	-2.47943	0.00025	-0.11749	0.90033	0.51859	0.62742	-0.33951	0.96708
C8orf4	-2.47937	0.00025	-2.62009	0	0.97839	0.30393	2.38134	0.24276
SFTPB	-2.47931	0.00025	-1.84183	0.002	0.19942	0.86473	1.38341	0.66591
YIPF1	-2.4793	0.00025	-2.54133	0	-1.26879	0.16443	0.44482	0.95581
CASC5	-2.47929	0.00025	-1.12687	0.04531	-1.5727	0.07478	-0.74848	0.89823
WT1	-2.47925	0.00025	-2.66586	0	-2.15654	0.01397	-0.39799	0.96082
PNPLA3	-2.4791	0.00025	-2.79729	0	-1.91974	0.02819	-0.54506	0.93969
GFRA1	-2.47908	0.00025	-1.08421	0.05354	-4.08869	0	-0.97723	0.83262
FLJ40172	-2.47906	0.00025	-3.03247	0	0.66764	0.51414	-0.01248	0.9992
UBFD1	-2.47898	0.00025	-2.43211	0.00018	-0.8233	0.40211	1.08126	0.7941
GYG2	-2.47895	0.00025	-3.01518	0	-1.29896	0.15362	-0.49732	0.9472
SYT8	-2.47892	0.00025	-2.46987	0.00018	1.89047	0.03056	0.67573	0.91363
CD55	-2.4788	0.00025	-3.14222	0	-6.98934	0	-1.512	0.60608
UMODL1	-2.47878	0.00025	-2.89051	0	0.02965	0.98274	0.25182	0.98171
STX11	-2.47878	0.00025	-2.80848	0	0.03825	0.97756	0.51034	0.94366
GNA14	-2.47863	0.00025	-0.23365	0.76348	-2.15571	0.01405	1.24717	0.72293
ARPM1	-2.4785	0.00025	-2.62673	0	-2.28158	0.00968	0.10844	0.9946
SLC1A1	-2.47849	0.00025	-2.19254	0.0004	-4.57325	0	-0.43944	0.95581
SMNDC1	-2.47848	0.00025	-2.81466	0	0.67233	0.51023	-0.71702	0.90289
ADCY1	-2.47841	0.00025	-2.91057	0	-0.69631	0.49144	1.71291	0.52305
NME6	-2.47829	0.00025	-2.9019	0	-0.86828	0.37388	-0.02236	0.9992
FOXC2	-2.47822	0.00025	-2.90302	0	-1.48366	0.09604	-0.4611	0.95239
FSIP1	-2.47811	0.00025	-1.22038	0.03254	0.6053	0.56295	0.55572	0.93747
DPH3	-2.47804	0.00025	-2.73226	0	-3.55071	0	0.06561	0.99638
ZNF286A	-2.47797	0.00025	-2.78006	0	0.86255	0.37676	0.7022	0.90663
MAP3K4	-2.47797	0.00025	-0.85762	0.14043	-0.90946	0.34703	-1.30664	0.69881
MGC13057	-2.47793	0.00025	-3.02552	0	-4.04457	0	0.0811	0.99626
NTSR1	-2.47789	0.00025	-2.76661	0	0.03211	0.98086	-0.26201	0.981
C15orf42	-2.47779	0.00025	-3.10342	0	-0.38384	0.7323	0.46317	0.95232
PEX11A	-2.47777	0.00025	-2.81178	0	5.03898	0	1.09769	0.78832
ATP8B3	-2.47776	0.00025	-2.65353	0	0.59084	0.57379	1.21365	0.73964
DEPDC4	-2.47764	0.00025	-2.51874	0	0.53689	0.61419	-0.25917	0.981
MOCS3	-2.47755	0.00025	-2.5728	0	2.2477	0.01062	0.38095	0.96105
LOC201725	-2.47745	0.00025	-2.77597	0	-3.82236	0	-3.2863	0.05699
HOXA11	-2.47728	0.00025	-2.66722	0	-0.61355	0.55691	0.14552	0.99145
ZNF558	-2.47726	0.00025	-2.83188	0	1.08897	0.24269	-0.24483	0.98246
IMPACT	-2.47723	0.00025	-3.03706	0	-0.85903	0.3797	0.02175	0.9992
GLRA3	-2.47721	0.00025	-0.29799	0.66835	0.50163	0.63888	0.58158	0.93596
BUB1	-2.47717	0.00025	-2.98073	0	-0.39308	0.7255	0.52111	0.94237
C6orf118	-2.47714	0.00025	-2.78415	0	-0.20856	0.85919	0.0545	0.99766
F2RL1	-2.47699	0.00025	-2.96863	0	-10.5575	0	-3.08991	0.07917
ALS2CR12	-2.47698	0.00025	-2.61841	0	-1.26446	0.16535	0.56819	0.93738
IFT20	-2.47697	0.00025	-2.72861	0	-2.83692	0.00149	1.29126	0.70847
ART3	-2.47694	0.00025	-2.23178	0.00032	-0.23706	0.83848	-0.41967	0.95836
AIM2	-2.47688	0.00025	-3.15996	0	-3.13559	0.00067	-1.47286	0.62359
MINPP1	-2.47688	0.00025	-3.00851	0	0.65173	0.52697	-0.42654	0.95836
SLC6A9	-2.47683	0.00025	-2.42219	0.00018	-4.26264	0	-0.11377	0.99449
EHHADH	-2.47681	0.00025	-2.90404	0	3.6087	0	-0.03527	0.9992
IGSF3	-2.47679	0.00025	-3.14337	0	-10.9202	0	-0.11931	0.99303
PDCD2L	-2.47676	0.00025	-2.88091	0	2.79124	0.002	0.11547	0.99403
TPRXL	-2.47669	0.00025	-2.62165	0	1.65028	0.0593	0.37143	0.96224
GLRX	-2.47659	0.00025	-3.05273	0	-2.99236	0.00095	-1.39719	0.65977
CDCA5	-2.47657	0.00025	-2.79471	0	-1.32292	0.14537	-0.15383	0.99145
C2orf40	-2.47651	0.00025	-3.02392	0	-0.83313	0.39565	-0.23177	0.98513
EMR4	-2.47645	0.00025	-3.00508	0	-0.54657	0.60667	-0.44358	0.95581
GNG8	-2.47643	0.00025	-2.61565	0	-2.07489	0.01779	0.55575	0.93747
SLC4A1AP	-2.47636	0.00025	-2.78323	0	0.59736	0.56851	-0.14478	0.99145
NOG	-2.47635	0.00025	-2.69011	0	1.29711	0.15405	-0.82952	0.88312
GLI3	2.47634	0.00025	2.61264	0	0.12744	0.91829	-0.06729	0.99638
TAF6	-2.47631	0.00025	-2.70495	0	1.00222	0.29015	1.32278	0.69406
RUNX2	-2.4762	0.00025	-1.23051	0.03156	-3.31925	0.00036	-0.86208	0.87163
PLCG2	-2.47614	0.00025	-1.25156	0.02858	-0.90098	0.35263	0.02905	0.9992
ACTR3	-2.47612	0.00025	-0.05945	0.95084	-5.62483	0	-3.16838	0.07014
C3orf25	-2.47608	0.00025	-2.96343	0	1.13612	0.22161	0.50576	0.94492
B4GALNT4	-2.47608	0.00025	-2.76996	0	-3.02343	0.00082	-0.64892	0.91992
USP44	-2.47599	0.00025	-2.92571	0	0.60637	0.56243	-0.00844	0.9992
RAD51	-2.47599	0.00025	-3.06116	0	-2.93092	0.0011	1.30698	0.69881
RG9MTD2	-2.47594	0.00025	-2.77901	0	2.26198	0.01014	1.26447	0.71551
ZBTB26	-2.47588	0.00025	-2.70254	0	0.6185	0.5528	0.17021	0.99014
HOXD10	-2.47587	0.00025	-3.10844	0	-0.97532	0.30632	0.53713	0.94108
STK40	-2.47583	0.00025	-1.77616	0.00269	-1.22323	0.18316	0.518	0.94237
C9orf72	-2.47579	0.00025	-2.52382	0	6.79397	0	1.82218	0.47569
QPCT	-2.47574	0.00025	-3.11975	0	-7.17725	0	-0.72983	0.90122
NPAS4	-2.4757	0.00025	-2.74478	0	-1.33757	0.14002	0.44093	0.95581
SLC22A2	-2.47557	0.00025	-1.75818	0.0032	-0.43953	0.68932	0.37886	0.96148
ZNF642	-2.47555	0.00025	-2.77539	0	-0.18344	0.87677	-1.37463	0.66905
HKDC1	-2.47551	0.00025	-2.9157	0	-1.16096	0.21067	0.38298	0.96082
MED18	-2.47547	0.00025	-2.62545	0	-2.09015	0.0172	-0.09206	0.99556
CCNE2	-2.47546	0.00025	-2.83501	0	-0.0405	0.97636	-0.37562	0.96222
IGFL2	-2.47543	0.00025	-2.73303	0	-2.09777	0.01668	-0.1443	0.99145
LASP1	-2.47541	0.00025	-2.14241	0.00047	-6.2761	0	-0.23623	0.98497
HS3ST1	-2.47541	0.00025	-2.95022	0	-2.78388	0.002	0.3925	0.96082
CHL1	-2.4754	0.00025	-0.73393	0.21328	-2.63738	0.00296	-1.28032	0.71311
CIAPIN1	-2.4754	0.00025	-2.69155	0	1.28324	0.15951	-0.34452	0.96566
PIWIL4	-2.47539	0.00025	-3.08024	0	-2.43593	0.00574	-0.71634	0.90297
WNT10A	-2.47529	0.00025	-3.02471	0	-2.01202	0.02208	-0.96912	0.83459
MGC87042	-2.47522	0.00025	-1.92469	0.00135	-0.28159	0.80745	-0.23439	0.98513
PLA2R1	-2.47517	0.00025	-0.93199	0.10207	-3.53048	0	-2.99059	0.09665
PARP11	-2.47512	0.00025	-2.75272	0	1.86899	0.03298	1.57198	0.58102
SLC25A14	-2.47496	0.00025	-2.81616	0	-1.3588	0.13219	1.28693	0.70847
MYO5C	-2.47492	0.00025	-2.71419	0	-0.96414	0.31216	-0.49433	0.94853
PHF16	-2.4749	0.00025	-2.9805	0	-4.02519	0	-1.21589	0.73714
ITLN1	-2.47465	0.00025	-2.58598	0	-1.41398	0.11466	-0.59788	0.93179
HOXB9	-2.47465	0.00025	-2.61511	0	-0.69058	0.49589	0.59246	0.93192
SCG3	-2.47465	0.00025	-1.64502	0.00557	-0.19696	0.86633	0.45714	0.95452
KIF12	-2.47465	0.00025	-2.72516	0	-1.58874	0.07103	0.89143	0.86044
SFTPC	-2.47465	0.00025	0.5822	0.32955	1.95197	0.02555	-0.25437	0.98171
DDC	-2.47465	0.00025	-2.22691	0.00032	0.88329	0.36419	-0.03402	0.9992
NOX3	-2.47465	0.00025	-1.37409	0.01743	-0.63633	0.53907	0.46037	0.95278
PDK3	-2.47464	0.00025	-2.40164	0.00018	-4.72756	0	-0.77482	0.8941
PTPRB	-2.4745	0.00025	-0.50643	0.39292	0.59753	0.56833	0.29894	0.97365
PLSCR2	-2.4744	0.00025	-1.74278	0.00352	0.60106	0.56605	-0.53306	0.94189
AKTIP	-2.4743	0.00025	-2.58992	0	-3.60651	0	0.53513	0.94187
TOX3	-2.47423	0.00025	-1.19523	0.03509	0.36674	0.74529	0.39933	0.96082
ADRA1B	-2.47419	0.00025	-2.77967	0	-1.68491	0.0533	-0.92396	0.85039
RAB9B	-2.47406	0.00025	-2.93507	0	2.48195	0.00489	0.62022	0.92562
ZNF253	-2.47406	0.00025	-2.78932	0	3.36632	0.00036	0.83548	0.87994
CCDC58	-2.47402	0.00025	-2.74482	0	3.1844	0.00054	-0.00831	0.9992
ASPHD2	-2.47401	0.00025	-2.87699	0	-1.43749	0.10857	0.70678	0.90508
GMNN	-2.4739	0.00025	-3.07928	0	1.09217	0.24135	-0.6932	0.90725
GPR68	-2.4738	0.00025	-2.96429	0	-3.47706	0	-2.3825	0.24185
APEX2	-2.47375	0.00025	-2.74065	0	-0.27688	0.81085	-0.95076	0.84495
SGTB	-2.47369	0.00025	-2.86684	0	-2.94629	0.00095	-0.55732	0.93738
DRP2	-2.47368	0.00025	-3.06114	0	1.63706	0.06156	0.69753	0.90663
FAM98B	-2.47368	0.00025	-3.03537	0	-0.38857	0.72884	-1.60084	0.56987
TAS2R5	-2.47368	0.00025	-2.68652	0	3.11469	0.00067	0.37284	0.96224
MAPK12	-2.47363	0.00025	-2.66443	0	-4.01237	0	-0.55408	0.93767
ZNF2	-2.47361	0.00025	-3.00998	0	0.65355	0.52525	1.07759	0.79438
SYCP2	-2.47356	0.00025	-3.13823	0	-2.09555	0.01697	-0.14623	0.99145
C13orf34	-2.47355	0.00025	-2.93766	0	-0.8726	0.3703	0.10679	0.9946
NOLA3	-2.47353	0.00025	-2.78932	0	-4.42322	0	0.02439	0.9992
EXOC8	-2.47349	0.00025	-2.82839	0	-0.61068	0.55842	-0.42315	0.95836
C17orf58	-2.47342	0.00025	-2.82309	0	-4.39303	0	0.264	0.981
FLJ35880	-2.47332	0.00025	-3.04069	0	-1.0861	0.24452	0.65806	0.91803
CA5BL	-2.47331	0.00025	-2.64567	0	-1.16161	0.21019	-0.73234	0.90122
PRKG2	-2.47327	0.00025	-1.28534	0.02459	0.67028	0.51183	-0.27604	0.97912
PASD1	-2.47325	0.00025	-2.99066	0	-0.36078	0.74982	0.69162	0.90736
JMJD2D	-2.47325	0.00025	-3.01713	0	-0.01104	0.9937	-0.29397	0.97549
GTF2IRD1	-2.47323	0.00025	-0.23873	0.75608	-3.73118	0	-0.44141	0.95581
C21orf45	-2.4732	0.00025	-3.04808	0	-0.12397	0.92066	-1.03422	0.80897
PSMD9	-2.47316	0.00025	-2.43829	0.00018	-2.89402	0.00124	0.77017	0.8941
LYPLA1	-2.47311	0.00025	-2.47381	0.00018	-0.66999	0.51208	0.47912	0.95022
C1orf174	-2.47309	0.00025	-2.70155	0	-2.95039	0.00095	-0.50559	0.94492
TMC3	-2.47307	0.00025	-2.81928	0	-0.42813	0.69673	0.87418	0.86721
FAM119A	-2.47295	0.00025	-2.58178	0	-0.49422	0.64496	0.75664	0.89823
SRD5A2	-2.47294	0.00025	-3.04953	0	0.16988	0.88688	1.11204	0.78234
TDRKH	-2.47292	0.00025	-2.93012	0	2.86439	0.00149	1.61541	0.56425
ANKRD37	-2.47281	0.00025	-2.89928	0	-0.711	0.48203	-0.00867	0.9992
CDH1	-2.47277	0.00025	-1.26727	0.02648	0.37354	0.7404	-1.1594	0.76125
PAPLN	-2.47276	0.00025	-2.82763	0	-2.49095	0.00482	1.10708	0.78303
GATM	-2.4727	0.00025	-2.96726	0	0.36305	0.74801	0.6924	0.90725
ETV5	-2.4727	0.00025	-2.78838	0	-1.32064	0.14601	0.3273	0.96815
HCG27	-2.47269	0.00025	-2.74989	0	0.76788	0.4406	0.13592	0.99145
C9orf61	-2.47266	0.00025	-2.94464	0	-0.95011	0.32126	-2.56199	0.19111
BPGM	-2.47265	0.00025	-2.7179	0	-3.2922	0.00036	-0.41404	0.95953
CAGE1	-2.47262	0.00025	-2.83122	0	0.43911	0.68956	-0.67309	0.91394
LAMC2	-2.47257	0.00025	-2.37798	0.00018	-1.15709	0.21278	1.06788	0.79785
NUFIP1	-2.47247	0.00025	-2.77459	0	2.30978	0.0086	0.91411	0.85162
DUSP10	-2.47245	0.00025	-3.14853	0	-3.87452	0	-0.85632	0.87482
PPIF	-2.47237	0.00025	-2.66463	0	-2.5293	0.00451	-0.77642	0.8941
USP10	-2.47237	0.00025	-1.77311	0.00289	2.75288	0.002	1.50437	0.61103
RPS15A	-2.47237	0.00025	-2.5684	0	0.78709	0.42809	-0.49967	0.94675
ADAM29	-2.47228	0.00025	-2.96893	0	-1.81387	0.03841	0.17853	0.98894
TYR	-2.47219	0.00025	-1.868	0.0016	1.2576	0.16869	-0.74864	0.89823
EDEM1	-2.47211	0.00025	-2.77481	0	-0.01639	0.99079	0.66881	0.91407
TRDMT1	-2.47208	0.00025	-1.88004	0.00154	0.68689	0.49782	-1.129	0.77189
THBS4	-2.472	0.00025	-2.25428	0.00032	-1.89633	0.03001	-0.64847	0.91992
EXDL1	-2.47189	0.00025	-1.92765	0.00128	-2.0601	0.01832	0.12743	0.99145
PDK1	-2.47176	0.00025	-2.77246	0	-1.22612	0.18244	-0.5779	0.93596
SHFM1	-2.47172	0.00025	-3.08188	0	0.52947	0.61921	-0.68988	0.90821
OCA2	-2.47171	0.00025	-1.02175	0.06927	-3.06772	0.00067	2.02751	0.39179
NMB	-2.47171	0.00025	-2.73991	0	-3.9312	0	-0.62094	0.92562
GPR37	-2.47166	0.00025	-2.97078	0	0.24129	0.8356	0.79332	0.89117
GLG1	2.47165	0.00025	3.32137	0	0.13001	0.91645	0.00657	0.9992
DEPDC7	-2.4716	0.00025	-2.85108	0	-2.87628	0.00149	0.35945	0.96274
IFT140	2.4716	0.00025	2.55808	0	0.77096	0.43842	1.00523	0.82422
BIN2	-2.47158	0.00025	-2.64659	0	0.00837	0.99503	-0.75935	0.8979
CNTD1	-2.47156	0.00025	-2.94938	0	-0.50882	0.63444	1.06326	0.80159
MCHR2	-2.47154	0.00025	-1.51617	0.00984	0.52596	0.62171	-0.12662	0.99145
GALNT8	-2.47151	0.00025	-2.25683	0.00032	-1.0813	0.24736	0.70075	0.90663
SFXN2	-2.4715	0.00025	-2.88077	0	-3.83346	0	-0.9103	0.8533
KIAA1024	-2.47148	0.00025	-2.76545	0	-5.01388	0	-3.48377	0.03896
DIAPH3	-2.4712	0.00025	0.23457	0.76216	-0.96357	0.31237	-0.20579	0.98827
PRDM8	-2.4712	0.00025	-2.87109	0	-0.67738	0.50596	-0.30113	0.97348
C3orf14	-2.47117	0.00025	-2.75114	0	-2.7537	0.002	-1.10541	0.78412
SLC2A9	-2.47117	0.00025	-0.92279	0.10688	-4.43308	0	-1.20725	0.74478
SLC19A3	-2.47115	0.00025	-2.68919	0	1.20444	0.19026	0.62085	0.92562
VPS16	-2.47107	0.00025	-2.7072	0	-1.09725	0.23891	-0.70456	0.90607
CYorf15A	-2.47088	0.00025	-2.68663	0	0.83472	0.39506	-0.20535	0.98827
LMBRD2	-2.47086	0.00025	-2.97494	0	-0.82507	0.40114	0.60738	0.92755
KIF9	-2.47078	0.00025	-2.54413	0	-0.51508	0.62953	-0.62802	0.92417
[truncated: 10,515 more rows]
